# Supplementary material for: The RNA-binding protein DAZL functions as repressor and activator of mRNA translation during oocyte maturation
Source: PubMed Central journal article supplement (PMC7070028; doi:10.1038/s41467-020-15209-9), 2020-03-13
Supplement: 41467_2020_15209_MOESM2_ESM.pdf [file 41467_2020_15209_MOESM2_ESM.pdf]

## Description of Additional Supplementary Files

File Name: Supplementary Data 1

Description: List of transcripts whose translation is significantly affected by Dazl depletion

File Name: Supplementary Data 2

Description: List of transcripts significantly immunoprecipitated above background in a Dazl-RIP experiment
