# Supplementary material for: The RNA-binding protein DAZL functions as repressor and activator of mRNA translation during oocyte maturation
Source: PubMed Central journal article supplement (PMC7070028; doi:10.1038/s41467-020-15209-9), 2020-03-13
Supplement: 41467_2020_15209_MOESM3_ESM.pdf [file 41467_2020_15209_MOESM3_ESM.pdf]

|         | baseMean    | log2FoldChange | lfcSE    | stat     | pvalue   | padj     |
|---------|-------------|----------------|----------|----------|----------|----------|
| Mlh3    | 1934.427933 | 8.383650812    | 0.958396 | 8.747582 | 2.18E-18 | 1.79E-14 |
| Fam69b  | 4878.031832 | -7.383418221   | 0.894194 | -8.25706 | 1.49E-16 | 6.15E-13 |
| Dlgap2  | 3145.791244 | 7.393062876    | 0.959221 | 7.707365 | 1.28E-14 | 3.53E-11 |
| Ccdc120 | 1721.537903 | -7.224269229   | 1.003188 | -7.20131 | 5.96E-13 | 1.23E-09 |
| Tex264  | 1667.29294  | -8.073341333   | 1.144463 | -7.05426 | 1.74E-12 | 2.86E-09 |
| Akt2    | 1842.578231 | -6.851406961   | 0.976448 | -7.01666 | 2.27E-12 | 3.12E-09 |
| Pigb    | 1249.360328 | -8.464945326   | 1.221039 | -6.93258 | 4.13E-12 | 4.62E-09 |
| Igfbp5  | 2781.173417 | 7.478908073    | 1.08064  | 6.920811 | 4.49E-12 | 4.62E-09 |
| Socs4   | 3494.561147 | 6.055688034    | 0.886727 | 6.829257 | 8.54E-12 | 7.81E-09 |
| Cd4     | 1316.666448 | 7.376603899    | 1.090056 | 6.767176 | 1.31E-11 | 9.64E-09 |
| Gm3765  | 956.0613421 | 6.915908806    | 1.0234   | 6.757779 | 1.40E-11 | 9.64E-09 |
| Smarcd2 | 1404.031413 | -7.308902913   | 1.081603 | -6.75747 | 1.40E-11 | 9.64E-09 |
| Slc6a7  | 4521.216155 | -5.83422797    | 0.871707 | -6.69288 | 2.19E-11 | 1.39E-08 |
| Bcl7c   | 1745.378997 | -7.946487657   | 1.226631 | -6.4783  | 9.28E-11 | 5.46E-08 |
| Sdhd    | 1694.456495 | -6.651601633   | 1.036557 | -6.41701 | 1.39E-10 | 7.63E-08 |
| Eif2b2  | 995.1282723 | -7.133643471   | 1.118265 | -6.37921 | 1.78E-10 | 8.83E-08 |
| Pde10a  | 2749.389937 | 6.073831731    | 0.952669 | 6.375594 | 1.82E-10 | 8.83E-08 |
| Gm24270 | 4347.629541 | 5.51009297     | 0.865786 | 6.364268 | 1.96E-10 | 8.98E-08 |
| Fbxl18  | 664.594313  | 7.020198605    | 1.113522 | 6.304498 | 2.89E-10 | 1.25E-07 |
| Rab3il1 | 1037.643528 | -7.387434517   | 1.176383 | -6.27978 | 3.39E-10 | 1.40E-07 |
| Gna12   | 1230.614656 | -6.630625083   | 1.06304  | -6.23742 | 4.45E-10 | 1.74E-07 |
| Dffa    | 812.7497988 | -7.257029143   | 1.187047 | -6.11351 | 9.75E-10 | 3.65E-07 |
| Lrif1   | 1876.740506 | 5.564486412    | 0.916186 | 6.07353  | 1.25E-09 | 4.48E-07 |
| Lmbr1   | 1646.816213 | -5.76484252    | 0.956468 | -6.02722 | 1.67E-09 | 5.72E-07 |
| Fasn    | 2775.4378   | -5.62676127    | 0.936538 | -6.00805 | 1.88E-09 | 6.18E-07 |
| Dab2ip  | 1803.741699 | 5.46518312     | 0.919897 | 5.94108  | 2.83E-09 | 8.97E-07 |
| Irf2bp2 | 766.0661492 | -7.435229678   | 1.253079 | -5.93357 | 2.96E-09 | 9.04E-07 |
| Kcnq1   | 834.2714478 | -7.558729013   | 1.283268 | -5.89022 | 3.86E-09 | 1.13E-06 |
| Smarcb1 | 988.8758574 | -7.804465583   | 1.328519 | -5.87456 | 4.24E-09 | 1.17E-06 |
| Rbm12   | 713.8132134 | -7.333082701   | 1.248806 | -5.87207 | 4.30E-09 | 1.17E-06 |
| Lgals12 | 688.891857  | -7.604439939   | 1.295737 | -5.86882 | 4.39E-09 | 1.17E-06 |
| Ap1m1   | 1323.096906 | -7.084955979   | 1.209178 | -5.85932 | 4.65E-09 | 1.17E-06 |
| Klhl20  | 810.1812375 | -6.835880465   | 1.166829 | -5.85851 | 4.67E-09 | 1.17E-06 |
| Cachd1  | 664.3829293 | -7.552087999   | 1.293822 | -5.83704 | 5.31E-09 | 1.29E-06 |
| Nsmce1  | 828.0742546 | -6.696757791   | 1.157318 | -5.78644 | 7.19E-09 | 1.69E-06 |
| Prr36   | 964.6828857 | -7.505091751   | 1.307296 | -5.74093 | 9.42E-09 | 2.15E-06 |
| Hyal2   | 686.762423  | -7.013206556   | 1.227077 | -5.71538 | 1.09E-08 | 2.44E-06 |
| Acyp1   | 778.2000635 | -6.453896986   | 1.13505  | -5.686   | 1.30E-08 | 2.77E-06 |
| Rnf166  | 887.9133924 | -7.971365757   | 1.402335 | -5.68435 | 1.31E-08 | 2.77E-06 |
| Pla2g6  | 692.9542761 | -6.802893469   | 1.206789 | -5.63718 | 1.73E-08 | 3.56E-06 |
| Fmo5    | 893.3917232 | -6.065582762   | 1.078121 | -5.62607 | 1.84E-08 | 3.70E-06 |
| Itgb1   | 593.0722576 | -7.387777927   | 1.319774 | -5.59776 | 2.17E-08 | 4.26E-06 |
| Mrps2   | 914.663737  | -6.005943568   | 1.075511 | -5.58427 | 2.35E-08 | 4.49E-06 |
| Spock1  | 1168.574703 | 5.628536021    | 1.008855 | 5.579131 | 2.42E-08 | 4.52E-06 |
| Rasa4   | 2001.560803 | -5.402050632   | 0.982596 | -5.49773 | 3.85E-08 | 6.98E-06 |
| Ttll1   | 804.9835757 | -6.23833484    | 1.135203 | -5.49535 | 3.90E-08 | 6.98E-06 |

|           |             |              |          |          |          |          |
|-----------|-------------|--------------|----------|----------|----------|----------|
| Fau       | 681.8504027 | -7.266670576 | 1.325101 | -5.48386 | 4.16E-08 | 7.25E-06 |
| Pdx1      | 1889.135835 | -5.112124906 | 0.932661 | -5.48122 | 4.22E-08 | 7.25E-06 |
| Vamp8     | 596.0362525 | -6.807902433 | 1.246358 | -5.46224 | 4.70E-08 | 7.75E-06 |
| Brsk2     | 596.1853216 | -6.808260667 | 1.247145 | -5.45907 | 4.79E-08 | 7.75E-06 |
| Gcfc2     | 1834.924663 | 5.213772512  | 0.955446 | 5.456898 | 4.85E-08 | 7.75E-06 |
| Ndufs2    | 826.2482333 | -5.951985349 | 1.091095 | -5.45506 | 4.90E-08 | 7.75E-06 |
| Tpra1     | 2488.374101 | -4.882188036 | 0.901852 | -5.41351 | 6.18E-08 | 9.60E-06 |
| Ier5l     | 801.7633063 | -6.497118427 | 1.205001 | -5.39179 | 6.98E-08 | 1.05E-05 |
| Ccdc38    | 525.7749306 | 6.309689857  | 1.170463 | 5.390766 | 7.02E-08 | 1.05E-05 |
| Rcl1      | 793.8568577 | -7.809641248 | 1.450837 | -5.38285 | 7.33E-08 | 1.08E-05 |
| Plpp6     | 1216.646071 | -5.60669674  | 1.043272 | -5.37414 | 7.69E-08 | 1.11E-05 |
| Stx8      | 585.5136846 | -7.369318191 | 1.375451 | -5.35775 | 8.43E-08 | 1.20E-05 |
| Lactb2    | 595.7217216 | -6.583651847 | 1.233341 | -5.33806 | 9.39E-08 | 1.29E-05 |
| Adcyap1r1 | 640.5731423 | 6.23604388   | 1.168279 | 5.337803 | 9.41E-08 | 1.29E-05 |
| Ccdc62    | 1578.534079 | -5.054964193 | 0.949784 | -5.32223 | 1.03E-07 | 1.38E-05 |
| Cdk20     | 1088.865258 | -5.610068377 | 1.056617 | -5.30946 | 1.10E-07 | 1.46E-05 |
| Avpi1     | 696.550168  | -6.154643098 | 1.161236 | -5.30008 | 1.16E-07 | 1.51E-05 |
| Fkbp8     | 787.6072882 | -5.982707146 | 1.134783 | -5.27212 | 1.35E-07 | 1.72E-05 |
| Poll      | 723.2815421 | -7.352028375 | 1.394844 | -5.27086 | 1.36E-07 | 1.72E-05 |
| 2810004N  | 811.6736771 | -5.743924463 | 1.091031 | -5.26467 | 1.40E-07 | 1.75E-05 |
| Thop1     | 1297.646017 | -5.143919584 | 0.978734 | -5.25569 | 1.47E-07 | 1.81E-05 |
| Dis3      | 1354.078362 | 5.618073976  | 1.070789 | 5.246667 | 1.55E-07 | 1.88E-05 |
| Thap11    | 1834.737491 | -4.867628111 | 0.929038 | -5.23943 | 1.61E-07 | 1.92E-05 |
| Gm38227   | 557.5026339 | 6.403851089  | 1.230991 | 5.20219  | 1.97E-07 | 2.30E-05 |
| Rad51c    | 1854.176093 | -5.070079997 | 0.974833 | -5.20097 | 1.98E-07 | 2.30E-05 |
| Gns       | 761.5722121 | -5.651138219 | 1.09879  | -5.14306 | 2.70E-07 | 3.09E-05 |
| Hsf2      | 726.1859945 | 5.761588861  | 1.126747 | 5.113473 | 3.16E-07 | 3.57E-05 |
| Mrs2      | 735.475763  | -6.233665063 | 1.224497 | -5.0908  | 3.57E-07 | 3.97E-05 |
| Pla2g12a  | 549.043183  | -6.953164136 | 1.367332 | -5.0852  | 3.67E-07 | 3.98E-05 |
| Rabif     | 1130.126514 | -5.215600825 | 1.025775 | -5.08455 | 3.69E-07 | 3.98E-05 |
| Mtmr12    | 544.2791223 | -6.45273192  | 1.26957  | -5.08261 | 3.72E-07 | 3.98E-05 |
| Cd96      | 552.8999885 | -7.28639456  | 1.436199 | -5.07339 | 3.91E-07 | 4.13E-05 |
| Zfp46     | 1047.600423 | -5.441574897 | 1.074489 | -5.06434 | 4.10E-07 | 4.24E-05 |
| Pard6b    | 3008.233803 | -4.464025776 | 0.881601 | -5.06355 | 4.12E-07 | 4.24E-05 |
| Asnsd1    | 448.4933033 | -6.983283404 | 1.380359 | -5.05903 | 4.21E-07 | 4.28E-05 |
| Nutm1     | 1347.16664  | 5.001159453  | 0.992472 | 5.039093 | 4.68E-07 | 4.69E-05 |
| Elk1      | 829.725468  | -6.870457378 | 1.364907 | -5.03365 | 4.81E-07 | 4.69E-05 |
| Mib1      | 808.5687    | -5.430337426 | 1.078851 | -5.03345 | 4.82E-07 | 4.69E-05 |
| Tbc1d20   | 1678.343438 | 4.68776454   | 0.931488 | 5.032554 | 4.84E-07 | 4.69E-05 |
| Mrpl21    | 768.968247  | -5.847398676 | 1.165319 | -5.01785 | 5.23E-07 | 4.95E-05 |
| Cox6b2    | 926.6815309 | -5.434385375 | 1.083023 | -5.01779 | 5.23E-07 | 4.95E-05 |
| Dscr3     | 1384.112832 | -6.801026469 | 1.358121 | -5.00767 | 5.51E-07 | 5.15E-05 |
| Tmco3     | 474.8250575 | -7.066000047 | 1.416448 | -4.98853 | 6.08E-07 | 5.57E-05 |
| Meg3      | 533.1182042 | -6.228809383 | 1.249066 | -4.98677 | 6.14E-07 | 5.57E-05 |
| Slc6a20b  | 624.8277688 | -6.135272532 | 1.230468 | -4.98613 | 6.16E-07 | 5.57E-05 |
| Slc16a5   | 432.0288182 | -6.929139014 | 1.392637 | -4.97555 | 6.51E-07 | 5.82E-05 |
| Anapc2    | 924.0329349 | -5.153745285 | 1.039772 | -4.95661 | 7.17E-07 | 6.30E-05 |

|           |             |              |          |          |          |          |
|-----------|-------------|--------------|----------|----------|----------|----------|
| Gm7706    | 477.5134355 | -6.750899215 | 1.362116 | -4.95618 | 7.19E-07 | 6.30E-05 |
| 3110043O  | 695.4134549 | -6.025706461 | 1.21761  | -4.9488  | 7.47E-07 | 6.47E-05 |
| 9330175E: | 488.0241159 | -6.518098561 | 1.318705 | -4.9428  | 7.70E-07 | 6.60E-05 |
| Fra10ac1  | 474.7686571 | -6.478048058 | 1.312155 | -4.93695 | 7.94E-07 | 6.72E-05 |
| Pcbp1     | 2157.383157 | -4.509553855 | 0.913691 | -4.93553 | 7.99E-07 | 6.72E-05 |
| 5530601H  | 557.9654185 | -5.970662736 | 1.2106   | -4.93199 | 8.14E-07 | 6.77E-05 |
| Ccdc88c   | 636.5443306 | -6.162272367 | 1.250238 | -4.92888 | 8.27E-07 | 6.81E-05 |
| Glb1l2    | 494.0146541 | -6.311997209 | 1.288096 | -4.90025 | 9.57E-07 | 7.80E-05 |
| St18      | 896.0970598 | 4.987148704  | 1.01927  | 4.892864 | 9.94E-07 | 8.02E-05 |
| Trpc5     | 603.4399818 | -6.237738142 | 1.275371 | -4.89092 | 1.00E-06 | 8.02E-05 |
| Ago2      | 498.7065049 | -6.32583211  | 1.297146 | -4.87673 | 1.08E-06 | 8.54E-05 |
| Golt1b    | 610.9108282 | 5.674206344  | 1.164917 | 4.870912 | 1.11E-06 | 8.71E-05 |
| Col9a3    | 1188.561743 | -5.088644738 | 1.046596 | -4.86209 | 1.16E-06 | 9.02E-05 |
| Fam72a    | 1184.701412 | -4.874137856 | 1.003554 | -4.85688 | 1.19E-06 | 9.18E-05 |
| Larp1     | 619.8621152 | -6.276733527 | 1.294586 | -4.84845 | 1.24E-06 | 9.49E-05 |
| Fth1      | 474.3015049 | -6.2528824   | 1.290605 | -4.84492 | 1.27E-06 | 9.57E-05 |
| Mrp158    | 510.6878103 | -6.848059581 | 1.417063 | -4.83257 | 1.35E-06 | 0.000101 |
| Zfp472    | 554.0795637 | -6.966405105 | 1.447179 | -4.81378 | 1.48E-06 | 0.00011  |
| Mtfr1     | 547.0123139 | -5.941801763 | 1.235901 | -4.80767 | 1.53E-06 | 0.000112 |
| Oard1     | 558.0430106 | -7.299590435 | 1.518941 | -4.80571 | 1.54E-06 | 0.000112 |
| Tfap2c    | 522.3359503 | -6.027997174 | 1.255591 | -4.80092 | 1.58E-06 | 0.000114 |
| Mapre3    | 467.5611125 | -6.720202783 | 1.4033   | -4.78886 | 1.68E-06 | 0.00012  |
| Sys1      | 423.6640858 | -6.900878121 | 1.443467 | -4.78076 | 1.75E-06 | 0.000124 |
| B3gnt7    | 512.0644313 | -5.845803896 | 1.225504 | -4.77012 | 1.84E-06 | 0.00013  |
| Nanos1    | 1284.007151 | -4.645059194 | 0.97441  | -4.76705 | 1.87E-06 | 0.00013  |
| Htra1     | 461.0896059 | -6.435594702 | 1.350948 | -4.76376 | 1.90E-06 | 0.00013  |
| Fam114a2  | 455.4799387 | -6.417983227 | 1.347254 | -4.76375 | 1.90E-06 | 0.00013  |
| Vamp4     | 700.2265598 | -6.300758287 | 1.326871 | -4.74858 | 2.05E-06 | 0.000139 |
| Pccb      | 2459.537344 | -5.497633367 | 1.159489 | -4.74143 | 2.12E-06 | 0.000143 |
| Ppid      | 2406.08207  | 4.224633689  | 0.89307  | 4.73046  | 2.24E-06 | 0.00015  |
| Srrt      | 480.356874  | -6.495160309 | 1.374882 | -4.72416 | 2.31E-06 | 0.000153 |
| A430005L: | 481.8688784 | -6.499527921 | 1.379302 | -4.71219 | 2.45E-06 | 0.000161 |
| Trmt10b   | 1762.75131  | -4.438913216 | 0.942869 | -4.70788 | 2.50E-06 | 0.000164 |
| Slc7a8    | 438.9803209 | -6.952342655 | 1.47736  | -4.70592 | 2.53E-06 | 0.000164 |
| Xpa       | 2244.479884 | 4.207845193  | 0.897257 | 4.689678 | 2.74E-06 | 0.000176 |
| Timd4     | 402.12407   | -6.82509859  | 1.456593 | -4.68566 | 2.79E-06 | 0.000178 |
| Tollip    | 1929.851625 | -4.78298918  | 1.021269 | -4.68338 | 2.82E-06 | 0.000179 |
| Fam162a   | 506.0314393 | -7.15796396  | 1.53089  | -4.67569 | 2.93E-06 | 0.000184 |
| Pkp2      | 2115.353169 | 5.042645494  | 1.079644 | 4.670654 | 3.00E-06 | 0.000187 |
| Emg1      | 1165.954526 | -5.261134506 | 1.126731 | -4.66938 | 3.02E-06 | 0.000187 |
| Zfp618    | 679.4211481 | -5.247448535 | 1.125861 | -4.66083 | 3.15E-06 | 0.000194 |
| Atp2b4    | 968.2472596 | -5.326588647 | 1.14365  | -4.65754 | 3.20E-06 | 0.000195 |
| Hnrnpdl   | 2657.1726   | -4.280660599 | 0.920157 | -4.6521  | 3.29E-06 | 0.000199 |
| Cenpt     | 419.7173288 | -6.299281645 | 1.354584 | -4.65034 | 3.31E-06 | 0.000199 |
| Pxmp4     | 489.6861651 | -6.522863514 | 1.403664 | -4.64703 | 3.37E-06 | 0.000201 |
| Zfp703    | 866.9330672 | -6.472205454 | 1.397213 | -4.63223 | 3.62E-06 | 0.000213 |
| 4921529LC | 792.1290733 | -5.890554726 | 1.271779 | -4.63174 | 3.63E-06 | 0.000213 |

|          |             |              |          |          |          |          |
|----------|-------------|--------------|----------|----------|----------|----------|
| Hars     | 441.4175808 | -5.954432276 | 1.289976 | -4.61593 | 3.91E-06 | 0.000228 |
| Kif21a   | 325.1848734 | 6.179029953  | 1.338918 | 4.614942 | 3.93E-06 | 0.000228 |
| Ttc4     | 438.3416009 | -5.944303995 | 1.289857 | -4.6085  | 4.06E-06 | 0.000234 |
| Wbp4     | 822.3145823 | -5.142936021 | 1.116468 | -4.60643 | 4.10E-06 | 0.000234 |
| Elf1     | 899.0120676 | -4.924328032 | 1.069266 | -4.60533 | 4.12E-06 | 0.000234 |
| Tspan33  | 2283.517618 | -4.336004397 | 0.942428 | -4.60089 | 4.21E-06 | 0.000237 |
| Ell2     | 523.6777097 | -6.031575229 | 1.317784 | -4.57706 | 4.72E-06 | 0.000264 |
| Bank1    | 3617.324795 | 4.306413726  | 0.942137 | 4.570899 | 4.86E-06 | 0.00027  |
| Mgat5    | 914.6752979 | -4.742557917 | 1.03885  | -4.5652  | 4.99E-06 | 0.000274 |
| Txnip    | 2360.999734 | -4.176253874 | 0.915284 | -4.56279 | 5.05E-06 | 0.000274 |
| Figla    | 465.6976373 | -5.707635727 | 1.251013 | -4.56241 | 5.06E-06 | 0.000274 |
| Lsm10    | 1391.043662 | -4.418721034 | 0.968523 | -4.56233 | 5.06E-06 | 0.000274 |
| Siva1    | 1031.821275 | -4.607127555 | 1.011087 | -4.55661 | 5.20E-06 | 0.000279 |
| Nr2c1    | 533.6562469 | -5.767115356 | 1.265816 | -4.55605 | 5.21E-06 | 0.000279 |
| Tmem42   | 478.9260435 | -6.073117295 | 1.335448 | -4.54762 | 5.43E-06 | 0.000287 |
| Med26    | 2499.768171 | -5.053784409 | 1.11139  | -4.54726 | 5.43E-06 | 0.000287 |
| 3830406C | 620.4223321 | -5.635273705 | 1.242137 | -4.53676 | 5.71E-06 | 0.0003   |
| Plcg2    | 369.4843004 | -6.378883094 | 1.406854 | -4.53415 | 5.78E-06 | 0.000301 |
| Pip5k1a  | 602.1957627 | -7.086996136 | 1.567617 | -4.52087 | 6.16E-06 | 0.000319 |
| Rpl22l1  | 399.6899005 | -6.492761197 | 1.438353 | -4.51403 | 6.36E-06 | 0.000327 |
| Mrpl9    | 398.7167932 | -6.812739023 | 1.512925 | -4.50302 | 6.70E-06 | 0.000343 |
| Cdca7    | 455.935549  | 5.389086433  | 1.197256 | 4.501196 | 6.76E-06 | 0.000343 |
| Dnal4    | 871.7298227 | -5.018873201 | 1.119262 | -4.48409 | 7.32E-06 | 0.00037  |
| Ubac2    | 1795.660788 | -4.370967881 | 0.976484 | -4.47623 | 7.60E-06 | 0.000381 |
| Sema5b   | 422.942621  | 5.626873351  | 1.257932 | 4.473114 | 7.71E-06 | 0.000385 |
| Mrnip    | 672.7802735 | -5.307943754 | 1.187224 | -4.47089 | 7.79E-06 | 0.000386 |
| Zfp964   | 394.0529515 | -5.983608364 | 1.338971 | -4.46881 | 7.87E-06 | 0.000388 |
| Letm1    | 834.2651786 | -4.814647901 | 1.078304 | -4.46502 | 8.01E-06 | 0.000392 |
| Foxc1    | 510.2946175 | 5.235254169  | 1.177438 | 4.446309 | 8.74E-06 | 0.000424 |
| Jazf1    | 3591.879688 | -4.015908644 | 0.903327 | -4.44569 | 8.76E-06 | 0.000424 |
| Rae1     | 1877.159729 | -4.143795787 | 0.932641 | -4.44308 | 8.87E-06 | 0.000427 |
| Lpl      | 1232.003352 | -4.899358508 | 1.103169 | -4.44117 | 8.95E-06 | 0.000428 |
| Pla2g15  | 688.7003615 | -5.06284938  | 1.140533 | -4.43902 | 9.04E-06 | 0.00043  |
| AC118476 | 727.8178912 | -4.855452865 | 1.098021 | -4.422   | 9.78E-06 | 0.000462 |
| Tmem43   | 1563.943978 | 4.223849695  | 0.95552  | 4.42047  | 9.85E-06 | 0.000462 |
| Pnpla2   | 1029.404151 | -7.862544007 | 1.778926 | -4.41983 | 9.88E-06 | 0.000462 |
| Gltf     | 679.1900407 | -5.87512676  | 1.330556 | -4.41554 | 1.01E-05 | 0.000464 |
| Csk      | 444.0053507 | -5.638182806 | 1.27723  | -4.41438 | 1.01E-05 | 0.000464 |
| C2cd2    | 737.5167715 | -4.823372496 | 1.0927   | -4.41418 | 1.01E-05 | 0.000464 |
| Mettl6   | 1510.58478  | -4.31274831  | 0.977083 | -4.4139  | 1.02E-05 | 0.000464 |
| Trmt11   | 446.1663425 | -5.970112611 | 1.353976 | -4.40932 | 1.04E-05 | 0.000472 |
| AW55198  | 718.9640434 | 4.800048484  | 1.090534 | 4.401558 | 1.07E-05 | 0.000486 |
| Ugt8a    | 606.8454671 | -5.954108243 | 1.353038 | -4.40055 | 1.08E-05 | 0.000486 |
| A330093E | 706.9425578 | -4.812682116 | 1.095727 | -4.39223 | 1.12E-05 | 0.000502 |
| Hnf1b    | 332.7299839 | -6.550496424 | 1.491977 | -4.39048 | 1.13E-05 | 0.000503 |
| Zfp628   | 541.9233902 | -6.252661595 | 1.427144 | -4.38124 | 1.18E-05 | 0.000521 |
| Ssna1    | 662.8210856 | -4.94427939  | 1.128799 | -4.38012 | 1.19E-05 | 0.000521 |

|           |             |              |          |          |          |          |
|-----------|-------------|--------------|----------|----------|----------|----------|
| Ino80e    | 911.8194579 | -5.036710219 | 1.150112 | -4.37932 | 1.19E-05 | 0.000521 |
| Stk39     | 891.4699689 | -5.718598768 | 1.308999 | -4.36868 | 1.25E-05 | 0.000545 |
| Pqbp1     | 782.5519748 | -4.910377417 | 1.12537  | -4.36335 | 1.28E-05 | 0.000555 |
| Glrx5     | 781.7575883 | -4.764281956 | 1.09225  | -4.3619  | 1.29E-05 | 0.000556 |
| Krt12     | 842.2215291 | -4.621130346 | 1.060668 | -4.35681 | 1.32E-05 | 0.000566 |
| Apaf1     | 462.356419  | -6.439767941 | 1.478818 | -4.35467 | 1.33E-05 | 0.000569 |
| Nup37     | 1404.33561  | -4.240529308 | 0.97627  | -4.3436  | 1.40E-05 | 0.000595 |
| Cbr1      | 660.5370789 | -4.821833104 | 1.11064  | -4.34149 | 1.42E-05 | 0.000598 |
| Eef1e1    | 537.779938  | -6.658931786 | 1.534317 | -4.34    | 1.42E-05 | 0.000599 |
| Cenpm     | 558.4385814 | -6.296036218 | 1.452102 | -4.33581 | 1.45E-05 | 0.000606 |
| Dusp16    | 348.8064972 | -6.03037216  | 1.391175 | -4.33473 | 1.46E-05 | 0.000606 |
| Gemin7    | 313.7777153 | -6.465531736 | 1.491831 | -4.33396 | 1.46E-05 | 0.000606 |
| Bcat1     | 497.6307496 | -5.313546989 | 1.2267   | -4.33158 | 1.48E-05 | 0.000609 |
| Scarb1    | 1254.403434 | 4.379109584  | 1.011542 | 4.329141 | 1.50E-05 | 0.000613 |
| Ildr1     | 454.3626826 | -6.414223839 | 1.482566 | -4.32643 | 1.52E-05 | 0.000618 |
| Ddx17     | 1058.151746 | -5.035689913 | 1.164842 | -4.32307 | 1.54E-05 | 0.000624 |
| Pdzd8     | 1832.5752   | -3.986203948 | 0.922875 | -4.31933 | 1.57E-05 | 0.000631 |
| Exd2      | 242.0132656 | 6.324686761  | 1.464551 | 4.318515 | 1.57E-05 | 0.000631 |
| Zfp691    | 1754.581075 | 3.967658639  | 0.921217 | 4.306976 | 1.66E-05 | 0.000662 |
| Ap1m2     | 591.3932621 | -5.565413785 | 1.301479 | -4.27622 | 1.90E-05 | 0.000756 |
| Cops7b    | 590.622206  | -6.377376806 | 1.492059 | -4.27421 | 1.92E-05 | 0.000759 |
| Fcho1     | 454.6997451 | -5.290051942 | 1.238159 | -4.27251 | 1.93E-05 | 0.000761 |
| Fbxo46    | 1246.454019 | 4.10385446   | 0.961213 | 4.269456 | 1.96E-05 | 0.000765 |
| Thgl1     | 419.8341924 | -6.887757086 | 1.613321 | -4.2693  | 1.96E-05 | 0.000765 |
| Pramef8   | 739.0080878 | -4.826248506 | 1.131762 | -4.26437 | 2.00E-05 | 0.000779 |
| Sec11a    | 1484.122721 | -4.415281163 | 1.037063 | -4.25748 | 2.07E-05 | 0.000799 |
| Metap1    | 432.8461514 | -5.335032994 | 1.257789 | -4.24159 | 2.22E-05 | 0.000854 |
| Pold2     | 489.1096009 | -6.521139227 | 1.539409 | -4.23613 | 2.27E-05 | 0.000871 |
| Preb      | 455.7450556 | -6.418629269 | 1.515689 | -4.23479 | 2.29E-05 | 0.000872 |
| Dnmt3l    | 1922.806536 | -4.353714136 | 1.030217 | -4.22602 | 2.38E-05 | 0.000903 |
| Tmem128   | 420.6669618 | -5.559355366 | 1.319557 | -4.21305 | 2.52E-05 | 0.000952 |
| Klhl25    | 727.8547755 | -6.218542697 | 1.476548 | -4.21154 | 2.54E-05 | 0.000954 |
| 4833439L1 | 451.0593176 | -5.661001057 | 1.345607 | -4.20702 | 2.59E-05 | 0.000968 |
| Ndufv2    | 298.0590637 | -6.390986824 | 1.521354 | -4.20085 | 2.66E-05 | 0.000991 |
| Plcb3     | 427.4036772 | -6.589968056 | 1.570442 | -4.19625 | 2.71E-05 | 0.001002 |
| Hspa2     | 709.688061  | 4.712298883  | 1.122994 | 4.196194 | 2.71E-05 | 0.001002 |
| Sec24d    | 302.5017444 | -6.412480328 | 1.531312 | -4.18757 | 2.82E-05 | 0.001035 |
| Tceanc2   | 494.987909  | -5.021788323 | 1.199415 | -4.18686 | 2.83E-05 | 0.001035 |
| Twsg1     | 594.1864165 | -4.783879824 | 1.14308  | -4.18508 | 2.85E-05 | 0.001039 |
| Abcb9     | 437.5724042 | -6.359570941 | 1.520878 | -4.18151 | 2.90E-05 | 0.001046 |
| Tbc1d10b  | 527.5808649 | -6.407565845 | 1.532366 | -4.18149 | 2.90E-05 | 0.001046 |
| D11Wsu47  | 916.1581905 | -4.529109293 | 1.083426 | -4.18036 | 2.91E-05 | 0.001047 |
| Cacfd1    | 418.6405752 | -5.413412674 | 1.295601 | -4.1783  | 2.94E-05 | 0.001051 |
| AC153816  | 335.1019749 | -6.23714536  | 1.494749 | -4.1727  | 3.01E-05 | 0.001073 |
| Irf3      | 443.7798876 | -6.380262988 | 1.529928 | -4.1703  | 3.04E-05 | 0.00108  |
| Git1      | 2604.522363 | -4.6150362   | 1.107682 | -4.16639 | 3.09E-05 | 0.001094 |
| Actn3     | 729.6631506 | -4.573734549 | 1.099945 | -4.15815 | 3.21E-05 | 0.001122 |

|            |             |              |          |          |          |          |
|------------|-------------|--------------|----------|----------|----------|----------|
| Prkx       | 442.4527555 | -5.367012068 | 1.29103  | -4.15715 | 3.22E-05 | 0.001122 |
| Tfap2a     | 984.6610339 | -4.930066544 | 1.185966 | -4.15701 | 3.22E-05 | 0.001122 |
| Lrrc47     | 1269.027553 | -4.07228195  | 0.97969  | -4.15671 | 3.23E-05 | 0.001122 |
| Bgn        | 1432.924993 | 4.168939082  | 1.003583 | 4.154056 | 3.27E-05 | 0.00113  |
| Pdgfb      | 1797.637171 | 4.275411526  | 1.029757 | 4.151864 | 3.30E-05 | 0.001136 |
| Ranbp3     | 3220.898886 | -4.264897483 | 1.030331 | -4.13935 | 3.48E-05 | 0.001195 |
| 9430021V   | 304.9916165 | -6.424174745 | 1.555195 | -4.13078 | 3.62E-05 | 0.001235 |
| Gfra4      | 867.2643064 | -4.415144942 | 1.069325 | -4.12891 | 3.64E-05 | 0.00124  |
| Inafm1     | 589.044412  | -4.711122073 | 1.141499 | -4.12714 | 3.67E-05 | 0.001245 |
| Elk3       | 620.5121272 | -5.635663359 | 1.367267 | -4.12184 | 3.76E-05 | 0.001268 |
| Kcnn2      | 4008.127179 | 3.534432135  | 0.858344 | 4.117735 | 3.83E-05 | 0.001286 |
| Plagl1     | 1099.153676 | 4.036802223  | 0.981403 | 4.113295 | 3.90E-05 | 0.001306 |
| Dctn3      | 699.1428955 | 4.581877913  | 1.114986 | 4.10936  | 3.97E-05 | 0.001322 |
| Tmem178l   | 300.2806593 | -6.077581567 | 1.479265 | -4.10851 | 3.98E-05 | 0.001322 |
| Mecom      | 405.4140546 | 5.071113661  | 1.235226 | 4.105413 | 4.04E-05 | 0.001335 |
| Popdc2     | 416.2514415 | -6.875084081 | 1.676591 | -4.10063 | 4.12E-05 | 0.001357 |
| Fkrp       | 514.3228852 | -4.839681017 | 1.181028 | -4.09785 | 4.17E-05 | 0.001368 |
| Nacad      | 1202.578094 | 3.98858161   | 0.97399  | 4.095093 | 4.22E-05 | 0.001379 |
| Tmem143    | 1538.215704 | -5.582224164 | 1.363544 | -4.09391 | 4.24E-05 | 0.00138  |
| Anapc7     | 1053.156372 | -4.091371901 | 1.00054  | -4.08917 | 4.33E-05 | 0.001403 |
| Nrcam      | 634.6757765 | 5.572718405  | 1.365978 | 4.079655 | 4.51E-05 | 0.001456 |
| Dnm3       | 402.8484951 | -6.504144193 | 1.60056  | -4.06367 | 4.83E-05 | 0.001546 |
| Mkl1       | 2769.946855 | -3.677742225 | 0.905155 | -4.06311 | 4.84E-05 | 0.001546 |
| Cpsf4      | 479.6343119 | -5.484959318 | 1.349977 | -4.063   | 4.84E-05 | 0.001546 |
| Cops7a     | 3565.696643 | -3.773372352 | 0.930237 | -4.05636 | 4.98E-05 | 0.001578 |
| Usp11      | 2118.573795 | -3.984415736 | 0.982404 | -4.05578 | 5.00E-05 | 0.001578 |
| Shisa8     | 345.7763983 | -6.606485378 | 1.629014 | -4.05551 | 5.00E-05 | 0.001578 |
| Fam13b     | 660.2629551 | -4.47036223  | 1.102511 | -4.05471 | 5.02E-05 | 0.001578 |
| Hectd3     | 2324.566219 | -3.923739759 | 0.969306 | -4.04799 | 5.17E-05 | 0.001617 |
| Rfx1       | 337.9506844 | -5.76019531  | 1.423525 | -4.04643 | 5.20E-05 | 0.001622 |
| Tifab      | 739.2785994 | 4.272221036  | 1.057389 | 4.040349 | 5.34E-05 | 0.001655 |
| Dph7       | 367.2919833 | -6.105289378 | 1.511227 | -4.03996 | 5.35E-05 | 0.001655 |
| I830077J0: | 1482.825398 | -5.269376932 | 1.305029 | -4.03775 | 5.40E-05 | 0.001664 |
| Akr7a5     | 1975.062593 | 3.840839652  | 0.956817 | 4.014186 | 5.97E-05 | 0.001828 |
| Hmgn1      | 1147.924207 | -3.977845123 | 0.991022 | -4.01388 | 5.97E-05 | 0.001828 |
| Sgcd       | 513.0751401 | -4.764490231 | 1.187673 | -4.01162 | 6.03E-05 | 0.001833 |
| Rgs19      | 394.7171722 | -5.200225219 | 1.296305 | -4.01157 | 6.03E-05 | 0.001833 |
| Wbp1l      | 1496.337132 | -3.967672588 | 0.992742 | -3.99668 | 6.42E-05 | 0.00194  |
| Tmem151:   | 607.9093748 | -5.084821145 | 1.272366 | -3.99635 | 6.43E-05 | 0.00194  |
| Mthfs1     | 271.7591041 | 5.844092902  | 1.464224 | 3.991255 | 6.57E-05 | 0.001975 |
| Zbtb14     | 386.0185664 | -5.167703096 | 1.296545 | -3.98575 | 6.73E-05 | 0.002014 |
| Sri        | 337.750715  | -5.983408792 | 1.501508 | -3.98493 | 6.75E-05 | 0.002014 |
| Mrpl3      | 959.6574375 | -4.241476889 | 1.066289 | -3.97779 | 6.96E-05 | 0.002068 |
| Zbtb6      | 339.6656998 | -5.991884197 | 1.506794 | -3.97658 | 6.99E-05 | 0.002071 |
| Dclre1c    | 3008.744365 | 4.515307095  | 1.136726 | 3.972205 | 7.12E-05 | 0.002102 |
| Cpne3      | 4589.570696 | 3.652024229  | 0.919628 | 3.971196 | 7.15E-05 | 0.002103 |
| Arhgef16   | 1113.878938 | -3.914518169 | 0.987252 | -3.96507 | 7.34E-05 | 0.002147 |

|           |             |              |          |          |          |          |
|-----------|-------------|--------------|----------|----------|----------|----------|
| Ddx41     | 2287.680564 | 3.692379045  | 0.931346 | 3.964562 | 7.35E-05 | 0.002147 |
| Mrpl48    | 1812.574097 | -4.017455318 | 1.014482 | -3.96011 | 7.49E-05 | 0.002176 |
| Lysmd4    | 1587.175281 | -3.759993652 | 0.949579 | -3.95964 | 7.51E-05 | 0.002176 |
| 4930558C: | 391.3696832 | 4.897254927  | 1.237049 | 3.958819 | 7.53E-05 | 0.002176 |
| Rbm5      | 630.8227872 | 4.455565478  | 1.126956 | 3.95363  | 7.70E-05 | 0.002216 |
| Tpgs1     | 256.7604828 | -6.174336999 | 1.56328  | -3.9496  | 7.83E-05 | 0.002246 |
| Cnpy2     | 385.4367957 | 5.188675007  | 1.314384 | 3.947609 | 7.89E-05 | 0.002257 |
| Ift46     | 334.948885  | -6.560060508 | 1.663055 | -3.94458 | 7.99E-05 | 0.002275 |
| Pigc      | 1329.312799 | -4.020936676 | 1.019644 | -3.94347 | 8.03E-05 | 0.002275 |
| Mrgbp     | 1256.744923 | -4.094087822 | 1.038257 | -3.94323 | 8.04E-05 | 0.002275 |
| Pdlim2    | 523.0593181 | -4.659002807 | 1.182759 | -3.9391  | 8.18E-05 | 0.002304 |
| Rps20     | 271.9288797 | -5.933417101 | 1.506506 | -3.93853 | 8.20E-05 | 0.002304 |
| Cmklr1    | 2635.635323 | -4.905427793 | 1.246419 | -3.93562 | 8.30E-05 | 0.002324 |
| Smco4     | 1796.199267 | -3.697814025 | 0.940886 | -3.93014 | 8.49E-05 | 0.002368 |
| Rnf167    | 513.4757129 | -5.467431486 | 1.391376 | -3.92951 | 8.51E-05 | 0.002368 |
| Zzef1     | 1088.492122 | -6.352505805 | 1.619247 | -3.92312 | 8.74E-05 | 0.002418 |
| Pds5a     | 571.2142054 | -4.499054255 | 1.146894 | -3.92281 | 8.75E-05 | 0.002418 |
| Sntg2     | 334.3901838 | -5.37831268  | 1.372765 | -3.91787 | 8.93E-05 | 0.002453 |
| Dlgap1    | 563.4910837 | -5.985116392 | 1.527695 | -3.91774 | 8.94E-05 | 0.002453 |
| Mrpl39    | 2384.995309 | 3.493177121  | 0.891989 | 3.916164 | 9.00E-05 | 0.002461 |
| Ccnh      | 476.3795644 | -5.054372302 | 1.29115  | -3.91463 | 9.05E-05 | 0.002469 |
| Dact3     | 566.1616646 | -4.485948877 | 1.147814 | -3.90826 | 9.30E-05 | 0.002526 |
| Kctd2     | 340.8597356 | -6.261628235 | 1.604438 | -3.90269 | 9.51E-05 | 0.002577 |
| Asna1     | 2897.545293 | -3.488518256 | 0.897563 | -3.88666 | 0.000102 | 0.002744 |
| Ccdc158   | 761.5498747 | -4.360658818 | 1.122479 | -3.88485 | 0.000102 | 0.002747 |
| Zmiz2     | 2071.631387 | -4.002572014 | 1.030326 | -3.88476 | 0.000102 | 0.002747 |
| Rpl17     | 489.0605545 | -4.625540527 | 1.191704 | -3.88145 | 0.000104 | 0.002768 |
| Pou2f2    | 10006.0564  | 3.877639144  | 0.99904  | 3.881364 | 0.000104 | 0.002768 |
| 1300002E: | 2425.513929 | 3.679725995  | 0.950607 | 3.870922 | 0.000108 | 0.002877 |
| Cd9       | 444.0351206 | -5.045919066 | 1.303724 | -3.87039 | 0.000109 | 0.002877 |
| Pop4      | 835.1047156 | -4.173970907 | 1.079803 | -3.86549 | 0.000111 | 0.002926 |
| AC107662  | 271.4723613 | -6.255418044 | 1.620025 | -3.86131 | 0.000113 | 0.002967 |
| Csnk1g2   | 1167.907126 | -3.87855612  | 1.006844 | -3.85219 | 0.000117 | 0.00307  |
| Klhl12    | 338.6433917 | -5.987511456 | 1.555024 | -3.85043 | 0.000118 | 0.003082 |
| Rbbp5     | 3838.629466 | 3.404586592  | 0.884762 | 3.848027 | 0.000119 | 0.003103 |
| Usp5      | 832.3706959 | -4.003974232 | 1.042096 | -3.84223 | 0.000122 | 0.003167 |
| Nadsyn1   | 896.2163471 | -3.964986239 | 1.032355 | -3.84072 | 0.000123 | 0.003176 |
| Snph      | 331.9422901 | -5.734111223 | 1.493674 | -3.83893 | 0.000124 | 0.00318  |
| Gm45903   | 582.7191528 | 5.35668575   | 1.39544  | 3.838706 | 0.000124 | 0.00318  |
| Strn4     | 1921.093494 | -3.594646314 | 0.936554 | -3.83816 | 0.000124 | 0.00318  |
| Tpm1      | 902.0819553 | -4.409080986 | 1.149961 | -3.83411 | 0.000126 | 0.003216 |
| R3hcc1l   | 1345.591337 | -3.699426555 | 0.964933 | -3.83387 | 0.000126 | 0.003216 |
| Spa17     | 388.8393395 | -5.770040817 | 1.505985 | -3.83141 | 0.000127 | 0.003238 |
| Arl15     | 963.1671003 | -3.873365932 | 1.011922 | -3.82773 | 0.000129 | 0.003277 |
| Ttc38     | 719.1970079 | -5.655961263 | 1.481789 | -3.81698 | 0.000135 | 0.003412 |
| Fbp2      | 503.0628452 | -4.538939386 | 1.19058  | -3.81238 | 0.000138 | 0.003466 |
| Ano10     | 301.2034722 | -5.81680308  | 1.526286 | -3.81108 | 0.000138 | 0.003473 |

|            |             |              |          |          |          |          |
|------------|-------------|--------------|----------|----------|----------|----------|
| Cisd2      | 635.9222098 | -4.206277173 | 1.106955 | -3.79986 | 0.000145 | 0.003623 |
| Nsdhl      | 2752.558495 | 4.00985017   | 1.05875  | 3.787344 | 0.000152 | 0.003799 |
| Rab11fip3  | 562.1262198 | -5.716272228 | 1.510749 | -3.78373 | 0.000154 | 0.003843 |
| Rit1       | 1008.40497  | -4.262767825 | 1.128785 | -3.77642 | 0.000159 | 0.003946 |
| Nefh       | 486.2819818 | 4.602913772  | 1.219879 | 3.773255 | 0.000161 | 0.003984 |
| Jmjd6      | 1276.10485  | -3.729942309 | 0.98914  | -3.77089 | 0.000163 | 0.00401  |
| Prr5       | 1328.103598 | -4.019591632 | 1.066396 | -3.76932 | 0.000164 | 0.004023 |
| Rpl41      | 1130.092082 | -3.713711043 | 0.989924 | -3.75151 | 0.000176 | 0.004297 |
| Six1       | 508.8959664 | 5.292059778  | 1.410689 | 3.751401 | 0.000176 | 0.004297 |
| Det1       | 342.9409287 | -5.587058855 | 1.494624 | -3.7381  | 0.000185 | 0.004517 |
| B530045E:  | 231.9998085 | -6.027055682 | 1.613132 | -3.73624 | 0.000187 | 0.004537 |
| Zfp612     | 666.5248002 | 4.015105055  | 1.075578 | 3.732976 | 0.000189 | 0.004583 |
| Tmod2      | 1743.027118 | -4.166289757 | 1.116307 | -3.73221 | 0.00019  | 0.004583 |
| Mapk14     | 2385.175823 | 3.745359715  | 1.004233 | 3.729574 | 0.000192 | 0.004618 |
| Sbno1      | 1929.645355 | -3.875967611 | 1.040329 | -3.72571 | 0.000195 | 0.004675 |
| Hpse       | 484.9245834 | -4.424611412 | 1.188546 | -3.72271 | 0.000197 | 0.004718 |
| Gk5        | 1026.831051 | -4.143851938 | 1.113952 | -3.71995 | 0.000199 | 0.004738 |
| Pkib       | 557.7737199 | -6.488285306 | 1.74432  | -3.71966 | 0.000199 | 0.004738 |
| Slc25a26   | 247.3510582 | -5.795527301 | 1.558177 | -3.71943 | 0.0002   | 0.004738 |
| Ndufb8     | 257.1430724 | -5.586571635 | 1.503809 | -3.71495 | 0.000203 | 0.0048   |
| Cep44      | 317.0707086 | -5.300492663 | 1.426909 | -3.71467 | 0.000203 | 0.0048   |
| Suds3      | 553.5278195 | -4.255261477 | 1.145802 | -3.71378 | 0.000204 | 0.004804 |
| Gmcl1      | 2766.721359 | -3.462575895 | 0.932605 | -3.7128  | 0.000205 | 0.004809 |
| S100a16    | 226.3807349 | -5.991373358 | 1.61501  | -3.70981 | 0.000207 | 0.004852 |
| Ddx4       | 590.6961882 | -4.177074614 | 1.127186 | -3.70575 | 0.000211 | 0.004916 |
| Josd1      | 1075.794664 | -3.688535156 | 0.997541 | -3.69763 | 0.000218 | 0.005062 |
| Olfr650-ps | 2337.006151 | 4.385554086  | 1.186817 | 3.695222 | 0.00022  | 0.005096 |
| Cmtm6      | 292.5792831 | -6.039715059 | 1.637508 | -3.68836 | 0.000226 | 0.00522  |
| Oosp1      | 3028.367837 | -4.108584413 | 1.114621 | -3.68608 | 0.000228 | 0.005253 |
| Rps9       | 990.4188811 | -3.834270375 | 1.042187 | -3.67906 | 0.000234 | 0.005384 |
| Ahsa2      | 447.8451784 | 4.530848362  | 1.232685 | 3.675593 | 0.000237 | 0.005443 |
| Nphp4      | 1099.86673  | 3.637217808  | 0.989882 | 3.674395 | 0.000238 | 0.005451 |
| Hist1h2aa  | 742.0165697 | -3.913370699 | 1.065218 | -3.67377 | 0.000239 | 0.005451 |
| C130074G   | 580.4814133 | -4.471090591 | 1.218063 | -3.67065 | 0.000242 | 0.005486 |
| Tnfsf13b   | 272.6791264 | -5.447230844 | 1.484157 | -3.67025 | 0.000242 | 0.005486 |
| Umps       | 387.6611132 | -5.59404098  | 1.524245 | -3.67004 | 0.000243 | 0.005486 |
| Gpm6a      | 1609.075774 | -3.927482282 | 1.070368 | -3.66928 | 0.000243 | 0.005487 |
| Prkab2     | 1504.366216 | 4.170313074  | 1.139553 | 3.659605 | 0.000253 | 0.005683 |
| Apip       | 1276.064741 | -3.529485423 | 0.964925 | -3.65778 | 0.000254 | 0.005708 |
| Nprl2      | 568.8046424 | -4.659620814 | 1.274667 | -3.65556 | 0.000257 | 0.005742 |
| Slc6a20a   | 907.0216794 | -4.184615067 | 1.145699 | -3.65246 | 0.00026  | 0.005796 |
| Slc25a44   | 960.4901322 | -3.693119675 | 1.013342 | -3.64449 | 0.000268 | 0.005962 |
| Hykk       | 462.9238548 | -5.852192902 | 1.609609 | -3.63579 | 0.000277 | 0.006151 |
| Ndufa1     | 475.0551734 | -5.144974033 | 1.415809 | -3.63395 | 0.000279 | 0.006178 |
| Cbfa2t3    | 963.3292913 | -3.773297345 | 1.038918 | -3.63195 | 0.000281 | 0.006209 |
| St6gal1    | 1591.306446 | -3.496077838 | 0.962882 | -3.63085 | 0.000282 | 0.006219 |
| Rnf139     | 1736.306097 | -3.382453586 | 0.933597 | -3.62303 | 0.000291 | 0.006393 |



|           |             |              |          |          |          |          |
|-----------|-------------|--------------|----------|----------|----------|----------|
| Ube4a     | 2475.293802 | 3.272772204  | 0.903821 | 3.621041 | 0.000293 | 0.006426 |
| Spata2    | 419.9065793 | -4.617014141 | 1.275592 | -3.61951 | 0.000295 | 0.006447 |
| 8430429Kl | 949.4417045 | 3.780989628  | 1.045281 | 3.617198 | 0.000298 | 0.006487 |
| Inpp1     | 270.597289  | -5.926451002 | 1.640015 | -3.61366 | 0.000302 | 0.006559 |
| Pcbp2     | 3960.561354 | -3.284577759 | 0.909446 | -3.61162 | 0.000304 | 0.006593 |
| Pwwp2a    | 671.8201679 | -4.287659249 | 1.187903 | -3.60944 | 0.000307 | 0.006632 |
| Ralgapa2  | 220.0384672 | -5.950115686 | 1.648829 | -3.60869 | 0.000308 | 0.006633 |
| Celf3     | 216.6261746 | -5.927230507 | 1.643496 | -3.60648 | 0.00031  | 0.006673 |
| Pdcd4     | 5325.094281 | 3.050809311  | 0.846083 | 3.605802 | 0.000311 | 0.006673 |
| 0610010Fc | 516.8264885 | -4.29936514  | 1.194766 | -3.5985  | 0.00032  | 0.006845 |
| Pde1b     | 713.3283689 | 3.81343122   | 1.060222 | 3.596824 | 0.000322 | 0.006871 |
| Gprasp1   | 352.7135749 | 4.963748566  | 1.38052  | 3.595565 | 0.000324 | 0.006887 |
| Tfip11    | 1124.454291 | -3.722209695 | 1.037144 | -3.5889  | 0.000332 | 0.007047 |
| Ndufa8    | 561.24583   | -4.967626399 | 1.384812 | -3.58722 | 0.000334 | 0.007071 |
| Sphk2     | 1365.96375  | -3.465791468 | 0.966367 | -3.58641 | 0.000335 | 0.007071 |
| BC005537  | 367.7110757 | 4.819199505  | 1.343884 | 3.586023 | 0.000336 | 0.007071 |
| Tmem9     | 868.5511585 | -4.120190792 | 1.150219 | -3.58209 | 0.000341 | 0.00716  |
| Sh3gl1    | 1595.627323 | -3.815457381 | 1.069138 | -3.56872 | 0.000359 | 0.007516 |
| Mfap3l    | 552.9916102 | -4.451292265 | 1.247618 | -3.56783 | 0.00036  | 0.007522 |
| Pinlyp    | 985.7988614 | -3.659870031 | 1.027086 | -3.56335 | 0.000366 | 0.007633 |
| Zc3h3     | 712.0982742 | -4.413144164 | 1.240876 | -3.55647 | 0.000376 | 0.007815 |
| Prdm6     | 937.9867626 | -3.733491796 | 1.050613 | -3.55363 | 0.00038  | 0.00788  |
| Cep85l    | 1007.375404 | -3.557254693 | 1.00332  | -3.54548 | 0.000392 | 0.008108 |
| H1f0      | 2130.798654 | -3.334572019 | 0.940698 | -3.54478 | 0.000393 | 0.008109 |
| Tor1aip1  | 6530.606455 | 3.132834998  | 0.884441 | 3.542164 | 0.000397 | 0.008169 |
| Lsm6      | 1049.251784 | -3.555210076 | 1.005583 | -3.53547 | 0.000407 | 0.008358 |
| Papss2    | 327.906714  | 4.857972444  | 1.377798 | 3.525896 | 0.000422 | 0.008628 |
| Rusc2     | 1202.621291 | 3.428280983  | 0.972351 | 3.525765 | 0.000422 | 0.008628 |
| Slc37a3   | 341.3525757 | -5.580300414 | 1.583797 | -3.52337 | 0.000426 | 0.008684 |
| Zfp939    | 1147.703394 | -3.48721443  | 0.990372 | -3.52112 | 0.00043  | 0.008737 |
| Ddx23     | 738.5577606 | -4.112850061 | 1.169816 | -3.51581 | 0.000438 | 0.008891 |
| Lrrc32    | 350.8606342 | -6.627627219 | 1.886992 | -3.51227 | 0.000444 | 0.008977 |
| Ankrd50   | 309.8479569 | -5.858258548 | 1.668353 | -3.5114  | 0.000446 | 0.008977 |
| BB557941  | 391.1705139 | -4.59208965  | 1.3078   | -3.51131 | 0.000446 | 0.008977 |
| Rab5c     | 4156.67061  | -3.129576503 | 0.892089 | -3.50814 | 0.000451 | 0.009062 |
| Dgke      | 1590.218843 | -3.283370494 | 0.938046 | -3.50022 | 0.000465 | 0.009313 |
| Fbxw23    | 1007.937736 | -3.94103432  | 1.130045 | -3.4875  | 0.000488 | 0.009744 |
| Mfsd13a   | 628.9301102 | 3.808142427  | 1.093225 | 3.483401 | 0.000495 | 0.009871 |
| Aig1      | 3963.775036 | 3.493647778  | 1.004042 | 3.479584 | 0.000502 | 0.009988 |
| S100pbb   | 1110.181621 | 3.418051091  | 0.984117 | 3.473215 | 0.000514 | 0.010203 |
| Gm5       | 339.7874905 | -5.108470899 | 1.471401 | -3.47184 | 0.000517 | 0.010231 |
| Mmp2      | 270.272494  | -5.434225878 | 1.566853 | -3.46824 | 0.000524 | 0.010344 |
| Mcat      | 375.0219087 | -4.450360432 | 1.284245 | -3.46535 | 0.00053  | 0.010431 |
| Nufip1    | 409.6996711 | -5.254597735 | 1.517164 | -3.46344 | 0.000533 | 0.010467 |
| Dnm2      | 943.4301433 | -3.507908191 | 1.012928 | -3.46314 | 0.000534 | 0.010467 |
| Tead3     | 287.4358399 | 5.128245358  | 1.481425 | 3.461699 | 0.000537 | 0.010492 |
| Eef1b2    | 729.7732399 | -4.15960959  | 1.20177  | -3.46123 | 0.000538 | 0.010492 |

|           |             |              |          |          |          |          |
|-----------|-------------|--------------|----------|----------|----------|----------|
| Ebna1bp2  | 914.8982663 | -4.068178834 | 1.175788 | -3.45996 | 0.00054  | 0.010498 |
| Tox       | 4285.449299 | 4.241815997  | 1.226032 | 3.459791 | 0.000541 | 0.010498 |
| Fbxl7     | 580.07329   | -6.545128027 | 1.893345 | -3.45691 | 0.000546 | 0.01058  |
| Minos1    | 567.6047662 | -4.037655036 | 1.168153 | -3.45644 | 0.000547 | 0.01058  |
| Dyrk1b    | 908.9362725 | -5.746711966 | 1.666228 | -3.44893 | 0.000563 | 0.010853 |
| 2700099C: | 338.694714  | -4.553496183 | 1.321128 | -3.44667 | 0.000568 | 0.010902 |
| Gm7073    | 308.0502123 | -5.258555311 | 1.525789 | -3.44645 | 0.000568 | 0.010902 |
| Rab4a     | 3125.805442 | 3.310077498  | 0.961209 | 3.443659 | 0.000574 | 0.010989 |
| Farp1     | 3686.039352 | -3.158134666 | 0.918575 | -3.43808 | 0.000586 | 0.011192 |
| Zfp341    | 718.2687223 | -4.238475597 | 1.233501 | -3.43613 | 0.00059  | 0.011247 |
| Tmem135   | 1229.793809 | -3.329852204 | 0.969394 | -3.43498 | 0.000593 | 0.011269 |
| Mlh1      | 4681.115126 | 3.489907982  | 1.016414 | 3.433549 | 0.000596 | 0.011286 |
| Psd2      | 2037.975946 | 4.46740051   | 1.301192 | 3.433313 | 0.000596 | 0.011286 |
| 2810021J2 | 194.5823911 | -5.771132732 | 1.682472 | -3.43015 | 0.000603 | 0.011393 |
| Gm11827   | 3120.315175 | -3.207640428 | 0.935668 | -3.42818 | 0.000608 | 0.011449 |
| Prr13     | 225.722787  | -5.662201907 | 1.652934 | -3.42555 | 0.000614 | 0.011534 |
| Slc25a1   | 368.8634695 | -4.425929486 | 1.292918 | -3.42321 | 0.000619 | 0.011605 |
| Exosc7    | 266.0073952 | -5.635801628 | 1.646621 | -3.42265 | 0.00062  | 0.011605 |
| Adgrl2    | 834.4728357 | -3.835157605 | 1.122089 | -3.41787 | 0.000631 | 0.011784 |
| AC156832  | 856.2102274 | -3.520495535 | 1.031142 | -3.41417 | 0.00064  | 0.011918 |
| Ncoa5     | 833.6799458 | -3.537161208 | 1.03652  | -3.41254 | 0.000644 | 0.011963 |
| Agpat3    | 563.9509911 | -4.067706074 | 1.19541  | -3.40277 | 0.000667 | 0.012371 |
| Ggta1     | 7290.513539 | -2.857629803 | 0.84009  | -3.40157 | 0.00067  | 0.012397 |
| Dennd1a   | 5111.055482 | -2.989308073 | 0.880007 | -3.39691 | 0.000682 | 0.012582 |
| Utp11     | 560.0502559 | -3.941378129 | 1.160804 | -3.39539 | 0.000685 | 0.012616 |
| Timm17a   | 2786.033304 | -3.017993815 | 0.888967 | -3.39494 | 0.000686 | 0.012616 |
| Gm44621   | 552.3258705 | -3.883842775 | 1.144481 | -3.39354 | 0.00069  | 0.012653 |
| Rit2      | 1828.634223 | 4.6724943    | 1.377233 | 3.392669 | 0.000692 | 0.012665 |
| Cap1      | 736.8407129 | 3.832725161  | 1.13193  | 3.386008 | 0.000709 | 0.012948 |
| Ranbp1    | 501.0866384 | -4.359453972 | 1.288214 | -3.38411 | 0.000714 | 0.013009 |
| Sssca1    | 481.2248839 | -6.497581528 | 1.923841 | -3.3774  | 0.000732 | 0.013292 |
| Pts       | 670.3370248 | 4.213569477  | 1.247906 | 3.376513 | 0.000734 | 0.013292 |
| Cldn8     | 396.4962358 | -4.315942861 | 1.278325 | -3.37625 | 0.000735 | 0.013292 |
| Ppm1l     | 1171.132654 | -3.302403375 | 0.978271 | -3.37576 | 0.000736 | 0.013292 |
| Ralgds    | 1111.096693 | -3.333130171 | 0.987781 | -3.37436 | 0.00074  | 0.013331 |
| 0610012G  | 596.6259229 | -3.827180291 | 1.134832 | -3.37246 | 0.000745 | 0.013363 |
| Rpa3      | 755.9788492 | -3.941072068 | 1.16877  | -3.37198 | 0.000746 | 0.013363 |
| Nfkbiz    | 1483.103217 | -3.409761196 | 1.01123  | -3.3719  | 0.000747 | 0.013363 |
| Dab2      | 20664.09604 | 2.7680743    | 0.821615 | 3.369065 | 0.000754 | 0.013472 |
| Pnpla6    | 2254.47708  | -3.12447511  | 0.928512 | -3.36503 | 0.000765 | 0.01364  |
| Vps8      | 1660.592177 | 3.107501945  | 0.92505  | 3.35928  | 0.000781 | 0.013897 |
| Crtc1     | 671.10379   | -3.682395037 | 1.100827 | -3.34512 | 0.000822 | 0.014595 |
| Nedd8     | 1779.750917 | -3.550958131 | 1.06221  | -3.34299 | 0.000829 | 0.014676 |
| Chmp1b    | 1199.030396 | 3.573589458  | 1.069863 | 3.340231 | 0.000837 | 0.014755 |
| Tsga10    | 1246.659351 | -3.481829023 | 1.042418 | -3.34015 | 0.000837 | 0.014755 |
| Trmt10a   | 509.6655784 | -3.957893195 | 1.185101 | -3.33971 | 0.000839 | 0.014755 |
| Dtx3l     | 489.9312152 | 3.863266857  | 1.157797 | 3.336738 | 0.000848 | 0.014862 |

|           |             |              |          |          |          |          |
|-----------|-------------|--------------|----------|----------|----------|----------|
| Zfp345    | 5902.079685 | 2.893431059  | 0.867201 | 3.336516 | 0.000848 | 0.014862 |
| Lima1     | 810.8969418 | -3.554439979 | 1.06562  | -3.33556 | 0.000851 | 0.014882 |
| Ttc39aos1 | 335.468519  | -6.238739927 | 1.872231 | -3.33225 | 0.000861 | 0.015028 |
| ldh1      | 212.1581636 | -5.305908731 | 1.592882 | -3.33101 | 0.000865 | 0.015063 |
| Obox5     | 23058.25417 | -2.906569475 | 0.872953 | -3.32958 | 0.00087  | 0.015082 |
| Mfn2      | 1649.366273 | -3.464004984 | 1.040501 | -3.32917 | 0.000871 | 0.015082 |
| Zfhx2     | 284.630813  | -4.720867415 | 1.418143 | -3.32891 | 0.000872 | 0.015082 |
| Dnah14    | 337.3537794 | -6.570690465 | 1.974894 | -3.32711 | 0.000878 | 0.015148 |
| Haus1     | 318.2550669 | -5.012328944 | 1.506966 | -3.32611 | 0.000881 | 0.015171 |
| Gls       | 515.016839  | 3.795044728  | 1.141676 | 3.324098 | 0.000887 | 0.015248 |
| Map3k12   | 833.3999179 | 3.413828974  | 1.027415 | 3.322737 | 0.000891 | 0.015285 |
| Kpna6     | 16102.75657 | 2.907069242  | 0.87516  | 3.321759 | 0.000895 | 0.015285 |
| Rc3h2     | 205.5405115 | -5.851033407 | 1.761467 | -3.32168 | 0.000895 | 0.015285 |
| Stim2     | 987.5528794 | -3.329827037 | 1.00329  | -3.31891 | 0.000904 | 0.015406 |
| Zc3h7b    | 1301.129389 | -3.201320208 | 0.965713 | -3.31498 | 0.000916 | 0.015592 |
| Phtf2     | 8764.761641 | -2.860717397 | 0.86368  | -3.31224 | 0.000926 | 0.015713 |
| Mtif3     | 450.747403  | -4.148681118 | 1.253166 | -3.31056 | 0.000931 | 0.015775 |
| Selenow   | 683.8535422 | -3.906333524 | 1.181578 | -3.30603 | 0.000946 | 0.015999 |
| Igkv13-87 | 202.0013978 | 5.129620708  | 1.552239 | 3.30466  | 0.000951 | 0.016045 |
| Adam32    | 221.173137  | -5.141458705 | 1.556482 | -3.30326 | 0.000956 | 0.016092 |
| Gnptg     | 571.552728  | -4.302794632 | 1.303587 | -3.30073 | 0.000964 | 0.016205 |
| Hvcn1     | 2342.201703 | -3.840416601 | 1.164386 | -3.29823 | 0.000973 | 0.016316 |
| Gm29595   | 308.444087  | -4.612268683 | 1.399692 | -3.2952  | 0.000984 | 0.01646  |
| Bcl7b     | 333.2365483 | -5.219425016 | 1.584586 | -3.29387 | 0.000988 | 0.016504 |
| Rps6ka3   | 3064.295791 | 3.812607216  | 1.157892 | 3.292715 | 0.000992 | 0.016539 |
| Cluap1    | 260.7957346 | -5.382427107 | 1.63608  | -3.28983 | 0.001002 | 0.016675 |
| Rheb      | 828.3475155 | -3.527454316 | 1.074698 | -3.28227 | 0.00103  | 0.017094 |
| Snrpd3    | 398.468373  | -5.341111766 | 1.627583 | -3.28162 | 0.001032 | 0.0171   |
| Rab3b     | 1282.978646 | -3.262078525 | 0.995663 | -3.27629 | 0.001052 | 0.017391 |
| Tarbp2    | 374.0321273 | -5.004454585 | 1.529965 | -3.27096 | 0.001072 | 0.017686 |
| Tbrg1     | 476.4104972 | -5.054671504 | 1.548969 | -3.26325 | 0.001101 | 0.018138 |
| Ak7       | 320.394487  | -6.171965091 | 1.892627 | -3.26106 | 0.00111  | 0.018243 |
| Ppp6r1    | 938.2910507 | -5.176072686 | 1.588057 | -3.25937 | 0.001117 | 0.018315 |
| Sel1l     | 4875.537331 | 2.788314173  | 0.857451 | 3.251865 | 0.001147 | 0.018768 |
| Rab1b     | 750.994525  | -3.438851181 | 1.058339 | -3.24929 | 0.001157 | 0.018901 |
| Dhcr7     | 452.1139597 | 3.828386499  | 1.179583 | 3.245542 | 0.001172 | 0.019114 |
| Dsc2      | 616.1281717 | -3.908096916 | 1.204481 | -3.24463 | 0.001176 | 0.019137 |
| Kin       | 1352.397457 | 3.41004046   | 1.053024 | 3.238332 | 0.001202 | 0.019512 |
| Axin1     | 964.02433   | -4.329683779 | 1.337159 | -3.23797 | 0.001204 | 0.019512 |
| Hspb11    | 296.7566913 | 4.755732963  | 1.469647 | 3.235969 | 0.001212 | 0.019611 |
| Braf      | 1532.737958 | 3.50864398   | 1.085353 | 3.232723 | 0.001226 | 0.019797 |
| Tubb3     | 5546.167122 | -2.743619709 | 0.848937 | -3.23183 | 0.00123  | 0.01982  |
| Lhb       | 408.2801029 | -4.922848676 | 1.524552 | -3.22905 | 0.001242 | 0.019975 |
| Cenpi     | 543.2615329 | 4.094248429  | 1.269074 | 3.22617  | 0.001255 | 0.020114 |
| Ninj1     | 1793.847714 | -3.039518794 | 0.942213 | -3.22593 | 0.001256 | 0.020114 |
| Anapc11   | 556.1822176 | -3.658469989 | 1.134301 | -3.22531 | 0.001258 | 0.020119 |
| Ubb       | 5551.706454 | -2.74161226  | 0.850582 | -3.22322 | 0.001268 | 0.020227 |

|          |             |              |          |          |          |          |
|----------|-------------|--------------|----------|----------|----------|----------|
| Gm14085  | 679.4831166 | -5.176118757 | 1.607285 | -3.22041 | 0.00128  | 0.020387 |
| Ift140   | 836.8734506 | -3.960748069 | 1.232852 | -3.21267 | 0.001315 | 0.020904 |
| Sass6    | 184.4843853 | 5.102592577  | 1.589043 | 3.211111 | 0.001322 | 0.020972 |
| Tril     | 699.1427959 | -4.905083881 | 1.527761 | -3.21064 | 0.001324 | 0.020972 |
| Extl1    | 196.9142564 | -5.463133707 | 1.701895 | -3.21003 | 0.001327 | 0.020976 |
| Tbl3     | 926.6486812 | -3.566852399 | 1.111461 | -3.20916 | 0.001331 | 0.020999 |
| Mthfd2   | 1465.609837 | -3.042497058 | 0.949011 | -3.20597 | 0.001346 | 0.021188 |
| Apool    | 223.1734467 | -5.970410689 | 1.862567 | -3.20547 | 0.001348 | 0.021188 |
| C130073F | 312.4128844 | -4.344868942 | 1.356947 | -3.20194 | 0.001365 | 0.021409 |
| AC149586 | 753.7896499 | -3.964752803 | 1.238552 | -3.20112 | 0.001369 | 0.02143  |
| Fam217a  | 7422.53967  | 2.67757744   | 0.836991 | 3.199051 | 0.001379 | 0.021543 |
| Trim35   | 249.9842639 | 4.997630258  | 1.563795 | 3.195835 | 0.001394 | 0.021743 |
| Itns1    | 5785.627458 | 2.849637137  | 0.892529 | 3.192766 | 0.001409 | 0.021894 |
| Rcc2     | 2512.582928 | -3.278423289 | 1.026836 | -3.19274 | 0.001409 | 0.021894 |
| Asah2    | 1474.238837 | 3.210956827  | 1.006108 | 3.191464 | 0.001416 | 0.02195  |
| Ppef1    | 1716.340839 | 2.942322451  | 0.922225 | 3.190462 | 0.00142  | 0.021955 |
| Otub2    | 2295.254576 | -3.869664127 | 1.212943 | -3.19031 | 0.001421 | 0.021955 |
| Inpp5b   | 896.8101494 | -3.287321003 | 1.030648 | -3.18957 | 0.001425 | 0.021971 |
| Slc38a7  | 227.3603442 | -5.181633512 | 1.625061 | -3.18858 | 0.00143  | 0.022005 |
| Fgf1     | 700.5009857 | -3.720682129 | 1.16722  | -3.18765 | 0.001434 | 0.02202  |
| Gm11639  | 993.1997382 | 3.871491599  | 1.214664 | 3.187296 | 0.001436 | 0.02202  |
| 4930522H | 649.0399504 | -4.4905631   | 1.410726 | -3.18316 | 0.001457 | 0.022296 |
| Kif1c    | 468.0983476 | -3.87308627  | 1.21758  | -3.18097 | 0.001468 | 0.022423 |
| Erg      | 4657.891926 | 2.806009193  | 0.882507 | 3.179588 | 0.001475 | 0.022489 |
| Cntnap3  | 525.5238526 | 3.608258589  | 1.135255 | 3.178368 | 0.001481 | 0.022542 |
| Ccdc93   | 1092.494065 | -3.320401006 | 1.045443 | -3.17607 | 0.001493 | 0.022679 |
| Rdh12    | 7456.349011 | 2.675987511  | 0.843239 | 3.173462 | 0.001506 | 0.022842 |
| Ppan     | 1127.398997 | -3.305172025 | 1.042051 | -3.17179 | 0.001515 | 0.022928 |
| Adhfe1   | 848.8753136 | -3.884210042 | 1.2248   | -3.1713  | 0.001518 | 0.022928 |
| Rasl11b  | 394.6670218 | -4.605140924 | 1.452472 | -3.17055 | 0.001521 | 0.022945 |
| Tgoln1   | 1770.78992  | 3.197268309  | 1.009271 | 3.167898 | 0.001535 | 0.023094 |
| Skiv2l2  | 8507.071722 | 3.001521214  | 0.947568 | 3.167605 | 0.001537 | 0.023094 |
| Rps5     | 322.9731388 | -4.229394027 | 1.338082 | -3.16079 | 0.001573 | 0.023598 |
| Ndufc1   | 1559.74504  | 3.095621444  | 0.979592 | 3.160113 | 0.001577 | 0.02361  |
| Gm19757  | 347.9912234 | 4.117618867  | 1.303431 | 3.159063 | 0.001583 | 0.023653 |
| Nlrp9a   | 85735.02465 | 2.575807305  | 0.815963 | 3.156771 | 0.001595 | 0.023796 |
| Nudt2    | 207.1803899 | -5.537576439 | 1.755482 | -3.15445 | 0.001608 | 0.023943 |
| Mrpl50   | 780.8560682 | 3.777320827  | 1.199127 | 3.150059 | 0.001632 | 0.024262 |
| Ednrb    | 250.6003543 | -4.661555325 | 1.480705 | -3.1482  | 0.001643 | 0.024364 |
| Rpp21    | 349.8277445 | -4.600986012 | 1.461663 | -3.14777 | 0.001645 | 0.024364 |
| BC024978 | 238.7505492 | 4.725631456  | 1.501694 | 3.146867 | 0.00165  | 0.024396 |
| Esr2     | 2508.985916 | 2.880742469  | 0.916155 | 3.144382 | 0.001664 | 0.02456  |
| Gm12328  | 485.3047703 | -3.690425343 | 1.174089 | -3.14322 | 0.001671 | 0.02457  |
| Atp6v0a1 | 607.8868864 | -4.393890672 | 1.397898 | -3.14321 | 0.001671 | 0.02457  |
| Agk      | 652.0210551 | -3.562179859 | 1.133582 | -3.14241 | 0.001676 | 0.024594 |
| Adm2     | 1340.954991 | -3.318689438 | 1.056709 | -3.14059 | 0.001686 | 0.024699 |
| Tomm22   | 1572.865461 | -2.932948777 | 0.934024 | -3.14012 | 0.001689 | 0.024699 |

|           |             |              |          |          |          |          |
|-----------|-------------|--------------|----------|----------|----------|----------|
| Dfna5     | 2019.691903 | 2.86378416   | 0.912235 | 3.139306 | 0.001693 | 0.024724 |
| Gm15592   | 165.4968981 | -5.535219879 | 1.76406  | -3.13777 | 0.001702 | 0.024809 |
| Trmt12    | 1473.850487 | 4.056060671  | 1.293987 | 3.134546 | 0.001721 | 0.02504  |
| Ogg1      | 911.9507354 | -4.858857432 | 1.550671 | -3.13339 | 0.001728 | 0.025094 |
| Trp73     | 295.3976465 | -5.196936658 | 1.661334 | -3.12817 | 0.001759 | 0.025466 |
| Crb3      | 240.7171542 | -5.265069386 | 1.683188 | -3.12803 | 0.00176  | 0.025466 |
| Mrpl13    | 557.2502091 | -5.830077077 | 1.86484  | -3.12632 | 0.00177  | 0.02557  |
| Npat      | 1628.48187  | 2.963690397  | 0.948286 | 3.125313 | 0.001776 | 0.025613 |
| Atic      | 297.2940615 | -4.271429383 | 1.36908  | -3.11993 | 0.001809 | 0.02604  |
| Ikbkb     | 446.4323899 | -3.802205557 | 1.221174 | -3.11357 | 0.001848 | 0.026562 |
| Gm7353    | 549.1574475 | -4.243641703 | 1.364429 | -3.1102  | 0.00187  | 0.02682  |
| Chtop     | 707.2591981 | -3.328116843 | 1.070459 | -3.10906 | 0.001877 | 0.026877 |
| Cct4      | 531.614931  | 3.742180191  | 1.203849 | 3.108512 | 0.00188  | 0.026879 |
| Zswim4    | 812.8890967 | -3.266041849 | 1.051509 | -3.10605 | 0.001896 | 0.027057 |
| Hist1h1a  | 950.5734195 | -3.81273489  | 1.228304 | -3.10406 | 0.001909 | 0.027146 |
| Dpysl5    | 800.3876771 | 3.444284648  | 1.109609 | 3.104053 | 0.001909 | 0.027146 |
| Gid8      | 594.0349164 | 3.518173045  | 1.134131 | 3.102086 | 0.001922 | 0.02728  |
| Rnase6    | 1180.826216 | 3.011870851  | 0.971456 | 3.100368 | 0.001933 | 0.027392 |
| Dpy19l3   | 1282.032772 | -3.053550444 | 0.986582 | -3.09508 | 0.001968 | 0.027837 |
| Eif2b4    | 1250.147381 | -3.024362716 | 0.978006 | -3.09238 | 0.001986 | 0.028009 |
| St3gal5   | 862.3896153 | 4.173579232  | 1.349698 | 3.092233 | 0.001987 | 0.028009 |
| Plekho1   | 247.9214053 | -4.517647684 | 1.461586 | -3.09092 | 0.001995 | 0.028085 |
| Klf7      | 4637.974746 | 2.871904207  | 0.929723 | 3.08899  | 0.002008 | 0.02822  |
| Eif3k     | 1253.930152 | -3.105381494 | 1.005734 | -3.08768 | 0.002017 | 0.028231 |
| Rps3a1    | 261.2325634 | -4.862565831 | 1.574887 | -3.08756 | 0.002018 | 0.028231 |
| Trmt1l    | 1579.583702 | 2.964139084  | 0.960089 | 3.08736  | 0.002019 | 0.028231 |
| Nmnat2    | 179.1337349 | -5.65045478  | 1.834379 | -3.08031 | 0.002068 | 0.028859 |
| Col6a5    | 1308.748884 | 3.262783848  | 1.059487 | 3.079589 | 0.002073 | 0.02888  |
| Gm5177    | 1303.667817 | -3.204315892 | 1.041501 | -3.07663 | 0.002094 | 0.029078 |
| Csnk1d    | 1791.981228 | -3.263049287 | 1.060697 | -3.07633 | 0.002096 | 0.029078 |
| 2610507B: | 2382.564111 | 2.753950457  | 0.895309 | 3.075977 | 0.002098 | 0.029078 |
| Arhgap5   | 1159.266684 | 3.756341884  | 1.221358 | 3.075545 | 0.002101 | 0.029078 |
| Gtpbp1    | 1323.917242 | -2.986687979 | 0.97137  | -3.07472 | 0.002107 | 0.029109 |
| Lrp11     | 896.8625619 | -3.685949519 | 1.199906 | -3.07186 | 0.002127 | 0.02934  |
| U2af2     | 505.7610358 | -3.86587868  | 1.259198 | -3.07011 | 0.00214  | 0.029463 |
| Gm15564   | 2748.453392 | 2.703951836  | 0.881288 | 3.068182 | 0.002154 | 0.029605 |
| Tmem150:  | 589.9304655 | -3.68550691  | 1.20256  | -3.06472 | 0.002179 | 0.0299   |
| Lypd6     | 671.4592455 | -3.373926256 | 1.102362 | -3.06063 | 0.002209 | 0.03026  |
| Slc25a15  | 2817.923019 | -2.745580887 | 0.897654 | -3.05862 | 0.002224 | 0.030414 |
| Cdpf1     | 1056.618465 | -3.348873243 | 1.095399 | -3.05722 | 0.002234 | 0.030506 |
| Add2      | 638.9364732 | -3.38782922  | 1.108957 | -3.05497 | 0.002251 | 0.030676 |
| Gpr27     | 305.2230711 | -5.416818628 | 1.773358 | -3.05456 | 0.002254 | 0.030676 |
| Fpgs      | 986.4935532 | -3.065219476 | 1.003827 | -3.05353 | 0.002262 | 0.03073  |
| Smim26    | 298.096436  | -4.190837178 | 1.373484 | -3.05125 | 0.002279 | 0.030914 |
| Krcc1     | 1737.696522 | -2.864223602 | 0.939219 | -3.04958 | 0.002292 | 0.03102  |
| Ccdc170   | 1603.325139 | 3.786065229  | 1.241645 | 3.049233 | 0.002294 | 0.03102  |
| Cacna1b   | 172.0008428 | -5.591245133 | 1.834619 | -3.04763 | 0.002307 | 0.031134 |

|           |             |              |          |          |          |          |
|-----------|-------------|--------------|----------|----------|----------|----------|
| Rpl22     | 1307.435647 | -2.924896288 | 0.960898 | -3.04392 | 0.002335 | 0.031469 |
| Cul4a     | 3057.64422  | 3.185911187  | 1.046912 | 3.04315  | 0.002341 | 0.031498 |
| Prkrip1   | 3028.458483 | -2.672608997 | 0.879209 | -3.03979 | 0.002367 | 0.0318   |
| Bbip1     | 987.0416636 | -3.245596762 | 1.067922 | -3.03917 | 0.002372 | 0.031814 |
| Ppif      | 1337.74602  | -3.184674384 | 1.050226 | -3.03237 | 0.002426 | 0.032486 |
| Rps3      | 920.4603453 | -3.487681871 | 1.152522 | -3.02613 | 0.002477 | 0.033081 |
| Shroom3   | 4390.153222 | -3.186163594 | 1.05296  | -3.02591 | 0.002479 | 0.033081 |
| Oxa1l     | 172.3681301 | -5.268753569 | 1.742496 | -3.02368 | 0.002497 | 0.033272 |
| Alg8      | 6006.785471 | 2.566973487  | 0.849953 | 3.020137 | 0.002527 | 0.033609 |
| Cux2      | 227.2543505 | -4.812981036 | 1.594258 | -3.01895 | 0.002537 | 0.033687 |
| Rabl6     | 365.6235508 | 4.320495618  | 1.431577 | 3.017998 | 0.002545 | 0.033738 |
| Cmc2      | 279.9305123 | -4.578504176 | 1.518644 | -3.01486 | 0.002571 | 0.034034 |
| Lmna      | 309.2151363 | -4.615882446 | 1.531387 | -3.01418 | 0.002577 | 0.034045 |
| Zmat3     | 823.0745905 | 3.175950262  | 1.053805 | 3.013793 | 0.00258  | 0.034045 |
| Eif3h     | 1350.004252 | -3.060137057 | 1.016237 | -3.01124 | 0.002602 | 0.034277 |
| Pskh1     | 1293.363519 | -3.295503369 | 1.094665 | -3.01051 | 0.002608 | 0.034305 |
| Slc25a38  | 735.273653  | -3.693187327 | 1.228018 | -3.00744 | 0.002635 | 0.034561 |
| Map1s     | 1182.758793 | -3.353234171 | 1.115037 | -3.00728 | 0.002636 | 0.034561 |
| Pygo2     | 488.4670282 | -3.894425416 | 1.295427 | -3.00629 | 0.002645 | 0.034619 |
| Gm14004   | 236.5613563 | -4.448483252 | 1.481363 | -3.00297 | 0.002674 | 0.034944 |
| AC101677  | 428.1571756 | -3.827628626 | 1.275677 | -3.00047 | 0.002696 | 0.035176 |
| Ptpdc1    | 1943.710223 | 2.846683366  | 0.950168 | 2.995978 | 0.002736 | 0.035641 |
| Adam7     | 335.058853  | 3.837186149  | 1.282627 | 2.991662 | 0.002775 | 0.036092 |
| Cpox      | 799.8071344 | -3.327216802 | 1.112401 | -2.99102 | 0.00278  | 0.036111 |
| Prmt5     | 177.1023325 | -5.308618815 | 1.776564 | -2.98814 | 0.002807 | 0.036396 |
| Mlx       | 790.5394716 | -3.142337525 | 1.052244 | -2.98632 | 0.002824 | 0.036556 |
| Klf16     | 1015.400754 | -2.981293433 | 0.99859  | -2.9855  | 0.002831 | 0.036596 |
| Lrp2      | 1213.666085 | 3.226780948  | 1.082615 | 2.980543 | 0.002877 | 0.037131 |
| Nucb1     | 2138.220531 | 2.742330626  | 0.920214 | 2.9801   | 0.002882 | 0.037131 |
| Gpr63     | 243.4127546 | -4.913467768 | 1.649704 | -2.97839 | 0.002898 | 0.037229 |
| Tm9sf3    | 1462.036239 | 2.815885089  | 0.945458 | 2.978331 | 0.002898 | 0.037229 |
| Olfm1     | 803.6939978 | -3.623510802 | 1.216849 | -2.97778 | 0.002903 | 0.037238 |
| Wdr92     | 493.5700143 | -3.478929663 | 1.169195 | -2.97549 | 0.002925 | 0.037459 |
| Rpl32     | 1184.962249 | -2.905124875 | 0.976968 | -2.97361 | 0.002943 | 0.03763  |
| Hid1      | 2986.29705  | 2.675139441  | 0.900287 | 2.971429 | 0.002964 | 0.03784  |
| Aff3      | 1655.87171  | 2.782485382  | 0.937276 | 2.968692 | 0.002991 | 0.038111 |
| Cnih4     | 1679.829262 | -2.874191339 | 0.968298 | -2.96829 | 0.002995 | 0.038111 |
| 1700084F2 | 525.7481699 | 3.535760734  | 1.191527 | 2.967419 | 0.003003 | 0.03816  |
| Aasdhppt  | 772.5405541 | 3.157551065  | 1.064275 | 2.966858 | 0.003009 | 0.038171 |
| Limd2     | 379.119372  | -3.739360575 | 1.261109 | -2.96514 | 0.003025 | 0.038326 |
| Trim30d   | 346.9174229 | 4.377518462  | 1.477882 | 2.962022 | 0.003056 | 0.038619 |
| Trim31    | 550.0577063 | -3.464634954 | 1.169793 | -2.96175 | 0.003059 | 0.038619 |
| Cd55      | 38194.93125 | 2.518325986  | 0.850391 | 2.961372 | 0.003063 | 0.038619 |
| C77370    | 749.6503049 | 3.109201693  | 1.050345 | 2.960172 | 0.003075 | 0.038711 |
| Lsm3      | 319.8143151 | -3.931057506 | 1.328207 | -2.95967 | 0.00308  | 0.038715 |
| Ccdc122   | 229.2404776 | -4.530347512 | 1.531912 | -2.95732 | 0.003103 | 0.038952 |
| Lhfp      | 836.353525  | -3.621016064 | 1.225855 | -2.95387 | 0.003138 | 0.03933  |

|          |             |              |          |          |          |          |
|----------|-------------|--------------|----------|----------|----------|----------|
| Zfp553   | 1286.012774 | 2.917293137  | 0.987896 | 2.953037 | 0.003147 | 0.039337 |
| Atp5g1   | 210.0773279 | -4.697461185 | 1.590809 | -2.95288 | 0.003148 | 0.039337 |
| Mipep    | 2484.066307 | -3.052131684 | 1.034125 | -2.95141 | 0.003163 | 0.039464 |
| Mapk11   | 380.422054  | -3.896606155 | 1.320677 | -2.95046 | 0.003173 | 0.039526 |
| Zfp541   | 212.0482637 | -5.571071457 | 1.890823 | -2.94637 | 0.003215 | 0.039991 |
| Gm44398  | 972.1615698 | -3.030708289 | 1.03017  | -2.94195 | 0.003262 | 0.040506 |
| Nqo1     | 546.2204793 | -3.346180867 | 1.137665 | -2.94127 | 0.003269 | 0.040534 |
| Cpb1     | 277.5497935 | -4.951749337 | 1.684409 | -2.93976 | 0.003285 | 0.040604 |
| Arhgef7  | 7327.229747 | -2.689831716 | 0.91519  | -2.9391  | 0.003292 | 0.040604 |
| Ctif     | 1835.865221 | -2.930696258 | 0.997211 | -2.93889 | 0.003294 | 0.040604 |
| Ubqln4   | 2921.836056 | -2.619901249 | 0.891465 | -2.93887 | 0.003294 | 0.040604 |
| Vps37c   | 1260.668411 | -3.133334979 | 1.0666   | -2.93768 | 0.003307 | 0.040625 |
| Mau2     | 1380.196685 | -2.910459569 | 0.990779 | -2.93755 | 0.003308 | 0.040625 |
| Cenpe    | 52668.96538 | 2.414792907  | 0.822108 | 2.93732  | 0.003311 | 0.040625 |
| Ssr2     | 710.0660571 | 3.161827286  | 1.077241 | 2.935117 | 0.003334 | 0.040854 |
| Cyth2    | 583.6054811 | -3.420336026 | 1.166386 | -2.93242 | 0.003363 | 0.041082 |
| Tubd1    | 628.6057027 | -3.295948304 | 1.124103 | -2.93207 | 0.003367 | 0.041082 |
| Gatsl2   | 409.148687  | -4.233852067 | 1.444012 | -2.93201 | 0.003368 | 0.041082 |
| Upp1     | 1271.371368 | -3.346099322 | 1.141697 | -2.93081 | 0.003381 | 0.04118  |
| Omt2b    | 5700.074863 | -2.473073426 | 0.84477  | -2.92751 | 0.003417 | 0.041558 |
| Gtf2h5   | 536.5553827 | -3.345445873 | 1.14314  | -2.92654 | 0.003428 | 0.041597 |
| Nfe2l2   | 3535.582607 | 2.811745843  | 0.960855 | 2.926295 | 0.00343  | 0.041597 |
| Ddx19a   | 40027.18112 | 2.376167279  | 0.813189 | 2.922036 | 0.003478 | 0.042109 |
| Srp54a   | 254.4577656 | -4.684261815 | 1.604597 | -2.91928 | 0.003508 | 0.042421 |
| Mbd4     | 320.8673164 | -4.29992385  | 1.473234 | -2.9187  | 0.003515 | 0.042437 |
| Ift22    | 1334.229623 | -2.796212178 | 0.960008 | -2.9127  | 0.003583 | 0.043198 |
| Pabpn1l  | 2213.093994 | -2.633191877 | 0.904459 | -2.91135 | 0.003599 | 0.04326  |
| Dnajc11  | 1673.784017 | -2.699848448 | 0.927358 | -2.91133 | 0.003599 | 0.04326  |
| Klhl32   | 667.1799709 | -3.161635933 | 1.087442 | -2.90741 | 0.003644 | 0.043743 |
| Cnm2     | 1249.578798 | 2.803962138  | 0.965692 | 2.903578 | 0.003689 | 0.044217 |
| Eefsec   | 616.6396303 | -3.844476871 | 1.324367 | -2.90288 | 0.003697 | 0.044252 |
| Prss37   | 327.3920898 | -4.10104591  | 1.414409 | -2.89948 | 0.003738 | 0.044641 |
| Cdk6     | 144.3303935 | -5.335520044 | 1.840392 | -2.89912 | 0.003742 | 0.044641 |
| Hmgn5    | 3067.076434 | 2.532104781  | 0.87351  | 2.898771 | 0.003746 | 0.044641 |
| Ddx56    | 222.4102517 | -4.485743326 | 1.549547 | -2.89487 | 0.003793 | 0.045133 |
| Slc16a12 | 364.0632384 | 3.732686787  | 1.289777 | 2.894056 | 0.003803 | 0.045186 |
| AU015836 | 207810.5124 | 2.363791974  | 0.818593 | 2.887629 | 0.003882 | 0.045988 |
| Smco2    | 178.4965703 | -5.645642758 | 1.955117 | -2.88762 | 0.003882 | 0.045988 |
| Fkbp14   | 487.935312  | 3.901290187  | 1.351415 | 2.886819 | 0.003892 | 0.046039 |
| Zfp956   | 984.7290283 | -3.444049379 | 1.193436 | -2.88583 | 0.003904 | 0.046091 |
| Eri3     | 507.9526619 | -3.586285227 | 1.242838 | -2.88556 | 0.003907 | 0.046091 |
| Carmil2  | 533.1622606 | 3.27311369   | 1.134588 | 2.884848 | 0.003916 | 0.04613  |
| Manf     | 233.874671  | -5.223262184 | 1.811034 | -2.88413 | 0.003925 | 0.046169 |
| Cyp2b23  | 230.5546807 | -4.292238386 | 1.490596 | -2.87955 | 0.003982 | 0.046772 |
| Limk1    | 531.0412975 | -3.620555917 | 1.257512 | -2.87914 | 0.003988 | 0.046772 |
| Pycr1    | 1076.758278 | 3.439821548  | 1.195409 | 2.877527 | 0.004008 | 0.046792 |
| Pygo1    | 962.0263816 | -2.932392501 | 1.019081 | -2.87749 | 0.004009 | 0.046792 |

|          |             |              |          |          |          |          |
|----------|-------------|--------------|----------|----------|----------|----------|
| Xpo5     | 2008.355558 | 2.656971811  | 0.923397 | 2.877388 | 0.00401  | 0.046792 |
| Trmu     | 177.934706  | -4.82253459  | 1.676114 | -2.87721 | 0.004012 | 0.046792 |
| AU040320 | 719.305279  | -3.096673663 | 1.077321 | -2.87442 | 0.004048 | 0.047141 |
| Lrrc41   | 386.0813021 | -3.584612047 | 1.24834  | -2.8715  | 0.004085 | 0.047462 |
| Ciapi1   | 1635.083836 | -2.680795195 | 0.933625 | -2.87138 | 0.004087 | 0.047462 |
| Map3k10  | 527.3788762 | -4.230731319 | 1.473847 | -2.87054 | 0.004098 | 0.047477 |
| Zfp735   | 11818.35234 | 2.422798315  | 0.844065 | 2.870393 | 0.0041   | 0.047477 |
| Wwp2     | 667.9387787 | -3.24130092  | 1.129708 | -2.86915 | 0.004116 | 0.047597 |
| Setdb2   | 412.0478612 | -3.598994569 | 1.254926 | -2.86789 | 0.004132 | 0.04772  |
| Nrip1    | 2420.938314 | 3.12435348   | 1.090319 | 2.86554  | 0.004163 | 0.048008 |
| Aurkaip1 | 529.4898063 | -3.27313373  | 1.14624  | -2.85554 | 0.004296 | 0.049451 |
| Ccdc85c  | 5056.095068 | -2.874990527 | 1.006907 | -2.85527 | 0.0043   | 0.049451 |
| Smpd1    | 2389.343815 | -2.54583254  | 0.892376 | -2.85287 | 0.004333 | 0.049637 |
| Fam206a  | 2285.016349 | 2.562578392  | 0.898322 | 2.852627 | 0.004336 | 0.049637 |
| Gm340    | 273.5208213 | -3.982707469 | 1.396243 | -2.85245 | 0.004338 | 0.049637 |
| Zpr1     | 1099.769395 | 2.800185807  | 0.981728 | 2.852302 | 0.00434  | 0.049637 |
| Txndc11  | 2419.881037 | -2.584146772 | 0.906398 | -2.85101 | 0.004358 | 0.04977  |
