# Supplementary material for: The RNA-binding protein DAZL functions as repressor and activator of mRNA translation during oocyte maturation
Source: PubMed Central journal article supplement (PMC7070028; doi:10.1038/s41467-020-15209-9), 2020-03-13
Supplement: 41467_2020_15209_MOESM4_ESM.pdf [file 41467_2020_15209_MOESM4_ESM.pdf]

| probe set | gene                                                                   | Accession    | Ab/IgG      | P value     |
|-----------|------------------------------------------------------------------------|--------------|-------------|-------------|
| 10471072  | Tor1b: torsin family 1, member B                                       | NM_133673    | 2.108065318 | 4.97813E-06 |
| 10454469  | Ammecr1: AMME chromosomal region gene 1-like                           | NM_153515    | 1.52884762  | 6.19826E-05 |
| 10508770  | Gm13033: prostaglandin-endoperoxide synthase 2 pseudogene              | AK142202     | 1.642683608 | 8.40924E-05 |
| 10545524  | 4931417E11Rik: RIKEN cDNA 4931417E11 gene                              | BC048456     | 1.512632486 | 0.000151504 |
| 10569011  | Ifitm5: interferon induced transmembrane protein 5                     | NM_053088    | 1.700227613 | 0.000167583 |
| 10428211  | Zfp706: zinc finger protein 706                                        | NM_026521    | 2.24143774  | 0.000187763 |
| 10415784  | Trim13: tripartite motif-containing 13                                 | NM_001164220 | 2.112437322 | 0.000201784 |
| 10422518  | Tmtc4: transmembrane and tetratricopeptide repeat containing 4         | NM_028651    | 2.086653045 | 0.000228858 |
| 10584124  | Arhgap32: Rho GTPase activating protein 32                             | NM_177379    | 1.53256733  | 0.000230605 |
| 10367673  | Plekhhg1: pleckstrin homology domain containing, family G (with RhoG   | NM_001033253 | 1.833878221 | 0.00026236  |
| 10374500  | Vps54: vacuolar protein sorting 54 (yeast)                             | NM_139061    | 2.188027378 | 0.000347876 |
| 10440099  | St3gal6: ST3 beta-galactoside alpha-2,3-sialyltransferase 6            | NM_018784    | 1.991791166 | 0.00036693  |
| 10376685  | Alkbh5: alkB, alkylation repair homolog 5 (E. coli)                    | NM_172943    | 1.526370677 | 0.000378759 |
| 10600377  | Atp6ap1: ATPase, H+ transporting, lysosomal accessory protein 1        | NM_018794    | 1.539651715 | 0.000393188 |
| 10542108  | Tom1: target of myb1 homolog (chicken)                                 | NM_011622    | 2.099725944 | 0.000417052 |
| 10603362  | Ccdc120: coiled-coil domain containing 120                             | NM_207202    | 1.553199067 | 0.000452869 |
| 10573803  | Cyld: cylindromatosis (turban tumor syndrome)                          | NM_001128169 | 1.586143951 | 0.00050062  |
| 10591164  | Zfp558: zinc finger protein 558                                        | NM_028935    | 2.2384443   | 0.000517256 |
| 10527713  | Rxfp2: relaxin/insulin-like family peptide receptor 2                  | NM_080468    | 1.892546101 | 0.000543274 |
| 10368981  | Lin28b: lin-28 homolog B (C. elegans)                                  | NM_001031772 | 1.722991396 | 0.000611455 |
| 10447224  | Dync2li1: dynein cytoplasmic 2 light intermediate chain 1              | NM_172256    | 1.602660976 | 0.000646601 |
| 10457918  | Gm5064: predicted gene 5064                                            | XR_031138    | 1.647811537 | 0.000688464 |
| 10357630  | Srgap2: SLIT-ROBO Rho GTPase activating protein 2                      | NM_001081011 | 1.984622967 | 0.000711682 |
| 10567423  | Dcun1d3: DCN1, defective in cullin neddylation 1, domain containing 3  | NM_173408    | 1.589198348 | 0.000715749 |
| 10484648  | Olfr1104: olfactory receptor 1104                                      | NM_146767    | 1.790784247 | 0.000777442 |
| 10515242  | Nsun4: NOL1/NOP2/Sun domain family, member 4                           | NM_028142    | 1.785225582 | 0.000807404 |
| 10422760  | Fyb: FYN binding protein                                               | NM_011815    | 1.630780028 | 0.000884325 |
| 10501104  | Slc6a17: solute carrier family 6 (neurotransmitter transporter), membe | NM_172271    | 1.955850571 | 0.000925787 |
| 10604038  | Sfrs17b: splicing factor, arginine/serine-rich 17b                     | NM_001081956 | 1.930616252 | 0.000997379 |
| 10373778  | Morc2a: microorchidia 2A                                               | NM_001159288 | 1.763401987 | 0.001198559 |
| 10540241  | Arl6ip5: ADP-ribosylation factor-like 6 interacting protein 5          | NM_022992    | 1.534792671 | 0.001282616 |
| 10350753  | Glul: glutamate-ammonia ligase (glutamine synthetase)                  | NM_008131    | 1.640934405 | 0.001309735 |
| 10357124  | Tsn: translin                                                          | NM_011650    | 2.125699481 | 0.001316266 |
| 10571984  | Ddx60: DEAD (Asp-Glu-Ala-Asp) box polypeptide 60                       | NM_001081215 | 1.592800872 | 0.001327755 |
| 10538927  | Amd1: S-adenosylmethionine decarboxylase 1                             | NM_009665    | 1.526723851 | 0.001344636 |
| 10512226  | Dcaf12: DDB1 and CUL4 associated factor 12                             | NM_026893    | 1.589015033 | 0.001359695 |
| 10479752  | Olah: oleoyl-ACP hydrolase                                             | NM_145921    | 1.789585925 | 0.001430493 |
| 10369752  | Lrrtm3: leucine rich repeat transmembrane neuronal 3                   | NM_178678    | 1.732075472 | 0.001523116 |
| 10530089  | Cckar: cholecystokinin A receptor                                      | NM_009827    | 1.554893785 | 0.001563321 |
| 10490078  | Sumo1: SMT3 suppressor of mif two 3 homolog 1 (yeast)                  | NM_009460    | 2.004066563 | 0.001580727 |
| 10563722  | Mrgpra3: MAS-related GPR, member A3                                    | NM_153067    | 1.767819026 | 0.001597371 |
| 10502355  | Gm4861: predicted gene 4861                                            | NM_177665    | 1.64717879  | 0.001598877 |
| 10497250  | Pag1: phosphoprotein associated with glycosphingolipid microdomain     | BC145761     | 1.814009505 | 0.001631502 |
| 10369890  | Cisd1: CDGSH iron sulfur domain 1                                      | BC013522     | 1.567545897 | 0.001640222 |
| 10537934  | Zfp212: Zinc finger protein 212                                        | NM_145576    | 2.213405797 | 0.001728864 |
| 10580082  | Rfx1: regulatory factor X, 1 (influences HLA class II expression)      | NM_009055    | 1.881306983 | 0.001752752 |
| 10546056  | Rab43: RAB43, member RAS oncogene family                               | NM_001039394 | 1.869826488 | 0.001765379 |
| 10408487  | Uqcrrf1: ubiquinol-cytochrome c reductase, Rieske iron-sulfur polypep  | NM_025710    | 2.16726     | 0.001776114 |
| 10416956  | Mir19b-1: microRNA 19b-1                                               | NR_029815    | 1.757267442 | 0.001799081 |
| 10422628  | Plcx3: phosphatidylinositol-specific phospholipase C, X domain conta   | NM_177355    | 1.833794557 | 0.001828254 |
| 10372618  | Frs2: fibroblast growth factor receptor substrate 2                    | NM_177798    | 1.62630937  | 0.001884104 |
| 10543226  | 2610001J05Rik: RIKEN cDNA 2610001J05 gene                              | NR_024619    | 1.506547641 | 0.001923556 |
| 10404578  | Cdyl: chromodomain protein, Y chromosome-like                          | NM_009881    | 1.562197924 | 0.001925785 |
| 10356172  | Pid1: phosphotyrosine interaction domain containing 1                  | NM_001003948 | 1.824939428 | 0.001940007 |
| 10459389  | Amd1: S-adenosylmethionine decarboxylase 1                             | NM_009665    | 1.527614372 | 0.001994837 |
| 10415608  | Ift88: intraflagellar transport 88 homolog (Chlamydomonas)             | NM_009376    | 1.701922635 | 0.002238547 |
| 10518805  | Vamp3: vesicle-associated membrane protein 3                           | NM_009498    | 2.173909813 | 0.002286511 |
| 10427849  | 6030458C11Rik: RIKEN cDNA 6030458C11 gene                              | NM_029998    | 1.513496965 | 0.00228704  |
| 10458424  | Taf7: TAF7 RNA polymerase II, TATA box binding protein (TBP)-associa   | NM_175770    | 2.012294038 | 0.002339944 |
| 10526487  | Alkbh4: alkB, alkylation repair homolog 4 (E. coli)                    | NM_028070    | 1.526144584 | 0.002384788 |
| 10464479  | Saps3: SAPS domain family, member 3                                    | NM_028999    | 1.893369808 | 0.002396355 |
| 10400795  | Sav1: salvador homolog 1 (Drosophila)                                  | NM_022028    | 1.894190643 | 0.002404217 |
| 10503023  | Cth: cystathionase (cystathionine gamma-lyase)                         | NM_145953    | 1.581623961 | 0.002434731 |
| 10357952  | Ppp1r12b: protein phosphatase 1, regulatory (inhibitor) subunit 12B    | NM_001081307 | 1.848843295 | 0.002517102 |

|          |                                                                          |                 |             |             |
|----------|--------------------------------------------------------------------------|-----------------|-------------|-------------|
| 10560015 | Rnf141: ring finger protein 141                                          | NM_025999       | 1.883988996 | 0.002517951 |
| 10586933 | Nedd4: neural precursor cell expressed, developmentally down-regula      | NM_010890       | 1.777419994 | 0.00264115  |
| 10457872 | Slc39a6: solute carrier family 39 (metal ion transporter), member 6      | NM_139143       | 1.955373319 | 0.002654611 |
| 10484773 | Olfr1214: olfactory receptor 1214                                        | NM_146897       | 1.793109059 | 0.002676724 |
| 10396862 | Actn1: actinin, alpha 1                                                  | NM_134156       | 1.518101628 | 0.00282699  |
| 10557754 | Orai3: ORAI calcium release-activated calcium modulator 3                | NM_198424       | 1.807764233 | 0.002850344 |
| 10428534 | Trps1: trichorhinophalangeal syndrome I (human)                          | NM_032000       | 2.123986454 | 0.002892178 |
| 10575120 | Sntb2: syntrophin, basic 2                                               | NM_009229       | 1.973889603 | 0.003072352 |
| 10492720 | Mtap9: microtubule-associated protein 9                                  | NM_001081230    | 1.770448117 | 0.003097439 |
| 10490955 | Mtfr1: mitochondrial fission regulator 1                                 | NM_026182       | 1.771411351 | 0.0031542   |
| 10476033 | Stk35: serine/threonine kinase 35                                        | NM_183262       | 1.999150806 | 0.003239278 |
| 10453026 | Prkd3: protein kinase D3                                                 | NM_001171004    | 1.852598287 | 0.003242785 |
| 10446656 | Lpin2: lipin 2                                                           | NM_001164885    | 1.727475877 | 0.003333779 |
| 10374453 | Glul: glutamate-ammonia ligase (glutamine synthetase)                    | NM_008131       | 1.641489046 | 0.003373734 |
| 10607747 | Siah1b: seven in absentia 1B                                             | NM_009173       | 1.937746918 | 0.00339946  |
| 10522250 | Tmem33: transmembrane protein 33                                         | NM_028975       | 2.066338601 | 0.003414258 |
| 10388591 | Cpd: carboxypeptidase D                                                  | NM_007754       | 1.573678129 | 0.003417887 |
| 10584162 | Tmed2: transmembrane emp24 domain trafficking protein 2                  | NM_019770       | 2.035264142 | 0.003530727 |
| 10353320 | Crisp4: cysteine-rich secretory protein 4                                | NM_030033       | 1.576520921 | 0.003539522 |
| 10556463 | Arntl: aryl hydrocarbon receptor nuclear translocator-like               | NM_007489       | 1.535301178 | 0.003574932 |
| 10585494 | Ube2q2: ubiquitin-conjugating enzyme E2Q (putative) 2                    | NM_180600       | 2.156659196 | 0.003608488 |
| 10428933 | H2afy3: H2A histone family, member Y3                                    | NR_003523       | 1.674247879 | 0.003619667 |
| 10413596 | Sfmbt1: Scm-like with four mbt domains 1                                 | NM_001166532    | 1.928972577 | 0.003751201 |
| 10583242 | Sesn3: sestrin 3                                                         | NM_030261       | 1.922004831 | 0.003760121 |
| 10411690 | Rad17: RAD17 homolog (S. pombe)                                          | NM_011233       | 1.872200403 | 0.003801179 |
| 10587023 | Rab27a: RAB27A, member RAS oncogene family                               | NM_023635       | 1.863286089 | 0.003831363 |
| 10517159 | Lin28a: lin-28 homolog A (C. elegans)                                    | NM_145833       | 1.722455037 | 0.003877865 |
| 10515943 | Ctps: cytidine 5'-triphosphate synthase                                  | NM_016748       | 1.582246914 | 0.00393068  |
| 10468519 | Smnnc1: survival motor neuron domain containing 1                        | NM_172429       | 1.970126466 | 0.003975558 |
| 10603746 | Maob: monoamine oxidase B                                                | NM_172778       | 1.740468591 | 0.003980338 |
| 10425114 | Tmed2: transmembrane emp24 domain trafficking protein 2                  | NM_019770       | 2.036967844 | 0.004020747 |
| 10509113 | Sfrs13a: splicing factor, arginine/serine-rich 13A                       | NM_010178       | 1.930220075 | 0.004065816 |
| 10417253 | Gm1973: predicted gene 1973                                              | NM_029288       | 1.644290494 | 0.004123254 |
| 10604405 | Aifm1: apoptosis-inducing factor, mitochondrion-associated 1             | NM_012019       | 1.52261571  | 0.004123819 |
| 10453544 | Mettl4: methyltransferase like 4                                         | NM_176917       | 1.747395112 | 0.004146054 |
| 10497878 | Il2: interleukin 2                                                       | NM_008366       | 1.703261516 | 0.004167378 |
| 10606619 | Sytl4: synaptotagmin-like 4                                              | NM_013757       | 2.012096455 | 0.00417194  |
| 10540911 | Tsen2: tRNA splicing endonuclease 2 homolog (S. cerevisiae)              | NM_199033       | 2.124958402 | 0.004236993 |
| 10523670 | Aff1: AF4/FMR2 family, member 1                                          | NM_001080798    | 1.520392808 | 0.004287144 |
| 10484581 | Olfr1053: olfactory receptor 1053                                        | NM_001177857    | 1.790327048 | 0.004298499 |
| 10599537 | Slc25a14: solute carrier family 25 (mitochondrial carrier, brain), memb  | NM_011398       | 1.94242597  | 0.004413129 |
| 10444394 | Pbx2: pre B-cell leukemia transcription factor 2                         | NM_017463       | 1.814415144 | 0.004447655 |
| 10425801 | Bik: BCL2-interacting killer                                             | NM_007546       | 1.542498568 | 0.004458078 |
| 10407513 | Wdr37: WD repeat domain 37                                               | NM_172445       | 2.191631287 | 0.004536476 |
| 10486499 | Tmem87a: transmembrane protein 87A                                       | NM_173734       | 2.079287725 | 0.004554368 |
| 10414590 | Ear6: eosinophil-associated, ribonuclease A family, member 6             | NM_053111       | 1.603689691 | 0.004628747 |
| 10525744 | Tmed2: transmembrane emp24 domain trafficking protein 2                  | NM_019770       | 2.034752414 | 0.004738225 |
| 10607910 | Msl3: male-specific lethal 3 homolog (Drosophila)                        | NM_010832       | 1.769872064 | 0.004748363 |
| 10516884 | Trnau1ap: tRNA selenocysteine 1 associated protein 1                     | NM_027925       | 2.121664268 | 0.00479644  |
| 10461012 | Trmt112: tRNA methyltransferase 11-2 homolog (S. cerevisiae)             | NM_001166370    | 2.121664268 | 0.00479644  |
| 10511062 | Tmem52: transmembrane protein 52                                         | NM_027161       | 2.072819034 | 0.004874711 |
| 10559238 | Igf2as: insulin-like growth factor 2, antisense                          | NR_002855       | 1.702017793 | 0.004893888 |
| 10551355 | Sertad3: SERTA domain containing 3                                       | NM_133210       | 1.921252322 | 0.004973209 |
| 10596988 | Plxn1: plexin B1                                                         | NM_172775       | 1.836815632 | 0.004977343 |
| 10363563 | Slc25a16: solute carrier family 25 (mitochondrial carrier, Graves diseas | NM_175194       | 1.943492568 | 0.005035462 |
| 10479297 | Lsm14b: LSM14 homolog B (SCD6, S. cerevisiae)                            | NM_177727       | 1.733120827 | 0.005045725 |
| 10431154 | Phf21b: PHD finger protein 21B                                           | NR_030731       | 1.82126117  | 0.005067706 |
| 10569085 | Lrrc56: leucine rich repeat containing 56                                | NM_001172064    | 1.731522444 | 0.005190518 |
| 10512030 | 3110043O21Rik: RIKEN cDNA 3110043O21 gene                                | BC076612        | 1.508960573 | 0.005236059 |
| 10484884 | Olfr1272: olfactory receptor 1272                                        | NM_146980       | 1.79443371  | 0.005263072 |
| 10507273 | Pik3r3: phosphatidylinositol 3 kinase, regulatory subunit, polypeptide : | NM_181585       | 1.82685328  | 0.005385125 |
| 10496629 | Sep15: selenoprotein                                                     | NM_053102       | 1.913669138 | 0.005387189 |
| 10498919 | Gm9989: predicted gene 9989                                              | ENSMUST00000069 | 1.66129204  | 0.005390323 |
| 10355017 | Sumo1: SMT3 suppressor of mif two 3 homolog 1 (yeast)                    | NM_009460       | 2.00258653  | 0.005463216 |
| 10459611 | Mc2r: melanocortin 2 receptor                                            | NM_008560       | 1.746437531 | 0.005466741 |

|          |                                                                          |                  |             |             |
|----------|--------------------------------------------------------------------------|------------------|-------------|-------------|
| 10407145 | Mier3: mesoderm induction early response 1, family member 3              | NM_172593        | 1.750968175 | 0.005507928 |
| 10466888 | Glis3: GLIS family zinc finger 3                                         | NM_175459        | 1.638783346 | 0.005520381 |
| 10407209 | Slc38a9: solute carrier family 38, member 9                              | NM_178746        | 1.952990751 | 0.005529344 |
| 10397912 | Unc79: unc-79 homolog (C. elegans)                                       | NM_001081017     | 2.164472481 | 0.00553044  |
| 10598638 | Mid1ip1: Mid1 interacting protein 1 (gastrulation specific G12-like (zet | NM_001166635     | 1.750270233 | 0.005540502 |
| 10419073 | Tspan14: tetraspanin 14                                                  | NM_145928        | 2.134047906 | 0.005568254 |
| 10606195 | Rlim: ring finger protein, LIM domain interacting                        | NM_011276        | 1.882379336 | 0.005574826 |
| 10530558 | Slain2: SLAIN motif family, member 2                                     | NM_153567        | 1.940781234 | 0.005576518 |
| 10412755 | Gm8471: predicted gene 8471                                              | XR_033275        | 1.65766366  | 0.005605346 |
| 10466282 | Olfr1426: olfactory receptor 1426                                        | NM_146809        | 1.799223702 | 0.005612489 |
| 10447490 | Pja2: praja 2, RING-H2 motif containing                                  | NM_001025309     | 1.830509138 | 0.005626048 |
| 10514201 | Haus6: HAUS augmin-like complex, subunit 6                               | NM_173400        | 1.676976182 | 0.005844097 |
| 10567412 | Eri2: exoribonuclease 2                                                  | NM_027698        | 1.608801466 | 0.005885808 |
| 10530045 | Sepsecs: Sep (O-phosphoserine) tRNA:Sec (selenocysteine) tRNA synth      | NM_172490        | 1.914152305 | 0.005933954 |
| 10599863 | 4931400O07Rik: RIKEN cDNA 4931400O07 gene                                | ENSMUST000000033 | 1.511634128 | 0.005950623 |
| 10547191 | Tmem72: transmembrane protein 72                                         | NM_178768        | 2.076858093 | 0.00610749  |
| 10502961 | Lhx8: LIM homeobox protein 8                                             | NM_010713        | 1.719577874 | 0.006121694 |
| 10420316 | Atp12a: ATPase, H+/K+ transporting, nongastric, alpha polypeptide        | NM_138652        | 1.539222205 | 0.006145077 |
| 10430711 | Slc25a17: solute carrier family 25 (mitochondrial carrier, peroxisomal i | NM_011399        | 1.945112157 | 0.00615871  |
| 10593526 | Atm: ataxia telangiectasia mutated homolog (human)                       | NM_007499        | 1.538633888 | 0.006183976 |
| 10405400 | Nsd1: nuclear receptor-binding SET-domain protein 1                      | NM_008739        | 1.782869665 | 0.006289772 |
| 10555407 | Chchd8: coiled-coil-helix-coiled-coil-helix domain containing 8          | NM_183270        | 1.565972412 | 0.006292596 |
| 10433352 | Ubn1: ubinuclein 1                                                       | NM_026666        | 2.162316093 | 0.006351065 |
| 10440993 | Rcan1: regulator of calcineurin 1                                        | NM_001081549     | 1.875106712 | 0.006491726 |
| 10458033 | Stard4: StAR-related lipid transfer (START) domain containing 4          | NM_133774        | 1.996890404 | 0.006554782 |
| 10351099 | Tnfsf18: tumor necrosis factor (ligand) superfamily, member 18           | NM_183391        | 2.099247649 | 0.006573962 |
| 10439835 | Gm4802: predicted gene 4802                                              | XM_126432        | 1.647070305 | 0.006597274 |
| 10400515 | Sec23a: SEC23A (S. cerevisiae)                                           | NM_009147        | 1.903091312 | 0.006613731 |
| 10557139 | Ubf1: ubiquitin family domain containing 1                               | NM_138589        | 2.159353736 | 0.006695573 |
| 10408142 | Vmn1r206: vomeronasal 1 receptor 206                                     | NM_134216        | 2.176046226 | 0.006768379 |
| 10449935 | Zfp870: zinc finger protein 870                                          | NM_207245        | 2.245957103 | 0.006913114 |
| 10549497 | Fam60a: family with sequence similarity 60, member A                     | NM_019643        | 1.620012868 | 0.006998401 |
| 10585572 | Hmg20a: high mobility group 20A                                          | NM_025812        | 1.688606625 | 0.007086861 |
| 10459705 | Smad4: MAD homolog 4 (Drosophila)                                        | NM_008540        | 1.963295106 | 0.007096098 |
| 10503150 | Rab2a: RAB2A, member RAS oncogene family                                 | NM_021518        | 1.866000725 | 0.007111821 |
| 10458583 | Yipf5: Yip1 domain family, member 5                                      | NM_023311        | 2.20018406  | 0.007181241 |
| 10563314 | Dhdh: dihydroadiol dehydrogenase (dimeric)                               | NM_027903        | 1.59446048  | 0.0072074   |
| 10533989 | LOC639341: similar to Spindlin-like protein 2 (SPIN-2)                   | XM_915736        | 1.724796898 | 0.007226869 |
| 10599192 | Lonrf3: LON peptidase N-terminal domain and ring finger 3                | NM_028894        | 1.726215026 | 0.007251791 |
| 10501661 | Sfrs3: splicing factor, arginine/serine-rich 3 (SRp20)                   | BC083316         | 1.933720034 | 0.007252792 |
| 10476759 | Rin2: Ras and Rab interactor 2                                           | NM_028724        | 1.881962852 | 0.007283302 |
| 10443940 | Zfp422-rs1: zinc finger protein 422, related sequence 1                  | NM_029952        | 2.230105839 | 0.007318316 |
| 10529581 | Mrfap1: Morf4 family associated protein 1                                | NM_026242        | 1.76519359  | 0.00732324  |
| 10584416 | Olfr905: olfactory receptor 905                                          | NM_146804        | 1.805828428 | 0.007378412 |
| 10385479 | Ibt: inhibitor of Bruton agammaglobulinemia tyrosine kinase              | NM_001081282     | 1.69827204  | 0.007490054 |
| 10433077 | Smug1: single-strand selective monofunctional uracil DNA glycosylase     | NM_027885        | 1.970212205 | 0.007584985 |
| 10363860 | Slc16a9: solute carrier family 16 (monocarboxylic acid transporters), nr | NM_025807        | 1.942260477 | 0.007609024 |
| 10390153 | Myst2: MYST histone acetyltransferase 2                                  | NM_177619        | 1.775266116 | 0.007642333 |
| 10414355 | Mapk1ip11: mitogen-activated protein kinase 1 interacting protein 1-lil  | NM_178684        | 1.743246471 | 0.007657724 |
| 10413897 | Erc6: excision repair cross-complementing rodent repair deficiency, c    | NM_001081221     | 1.608604134 | 0.007704813 |
| 10453166 | Cdk14: cyclin-dependent kinase-like 4                                    | NM_001033443     | 1.561846496 | 0.007717696 |
| 10546134 | Kbtbd12: kelch repeat and BTB (POZ) domain containing 12                 | NM_029013        | 1.706613542 | 0.007804527 |
| 10487945 | Gpcpd1: glycerophosphocholine phosphodiesterase GDE1 homolog (S.         | NM_028802        | 1.666119183 | 0.007810965 |
| 10368486 | Rnf146: ring finger protein 146                                          | NM_001110197     | 1.885320263 | 0.007826514 |
| 10457385 | Ccny: cyclin Y                                                           | NM_026484        | 1.556449276 | 0.007833393 |
| 10606217 | Abcb7: ATP-binding cassette, sub-family B (MDR/TAP), member 7            | NM_009592        | 1.51594868  | 0.007910038 |
| 10349793 | Dsty: dual serine/threonine and tyrosine protein kinase                  | NM_172516        | 1.598978476 | 0.007923582 |
| 10446581 | Zfp161: zinc finger protein 161                                          | NM_009547        | 2.212787814 | 0.007977156 |
| 10458767 | Trim36: tripartite motif-containing 36                                   | NM_178872        | 2.115854686 | 0.008017732 |
| 10536595 | Naa38: N(alpha)-acetyltransferase 38, NatC auxiliary subunit             | NM_133939        | 1.775414215 | 0.008042891 |
| 10549794 | Gm5065: predicted gene 5065                                              | NR_003622        | 1.648089138 | 0.008059064 |
| 10412454 | Ctsm: cathepsin M                                                        | NM_022326        | 1.58280343  | 0.008069265 |
| 10491231 | Mynn: myoneurin                                                          | NM_030557        | 1.773642448 | 0.008358382 |
| 10354258 | Uxs1: UDP-glucuronate decarboxylase 1                                    | NM_026430        | 2.168486299 | 0.008440438 |
| 10475912 | Tmem87b: transmembrane protein 87B                                       | NM_028248        | 2.085231089 | 0.008540489 |

|          |                                                                           |              |             |             |
|----------|---------------------------------------------------------------------------|--------------|-------------|-------------|
| 10424126 | Depdc6: DEP domain containing 6                                           | NM_001037937 | 1.59328638  | 0.008566478 |
| 10521589 | Cir1: corepressor interacting with RBPJ, 1                                | NM_025854    | 1.566867761 | 0.008766063 |
| 10441330 | Zfp295: zinc finger protein 295                                           | NM_175428    | 2.22202228  | 0.008777114 |
| 10428020 | March6: membrane-associated ring finger (C3HC4) 6                         | NM_172606    | 1.745737866 | 0.008858686 |
| 10399841 | Cbl1: Casitas B-lineage lymphoma-like 1                                   | NM_134048    | 1.551969915 | 0.008975319 |
| 10369655 | Stox1: storkhead box 1                                                    | NM_001033260 | 2.001678783 | 0.009072277 |
| 10539813 | Ccdc48: coiled-coil domain containing 48                                  | NM_001159697 | 1.554163076 | 0.009150711 |
| 10398678 | Eif5: eukaryotic translation initiation factor 5                          | NM_173363    | 1.605709845 | 0.0091529   |
| 10492582 | Mir15b: microRNA 15b                                                      | NR_029529    | 1.753880495 | 0.009217065 |
| 10554839 | Picalm: phosphatidylinositol binding clathrin assembly protein            | NM_146194    | 1.823435395 | 0.009222789 |
| 10502079 | 5730508B09Rik: RIKEN cDNA 5730508B09 gene                                 | BC116791     | 1.51339091  | 0.009295684 |
| 10425357 | Smcr7l: Smith-Magenis syndrome chromosome region, candidate 7-lik         | NM_178719    | 1.964048029 | 0.00933654  |
| 10545623 | Dok1: docking protein 1                                                   | NM_010070    | 1.597779548 | 0.009353169 |
| 10505451 | Orm2: orosomucoid 2                                                       | NM_011016    | 1.808720398 | 0.009382233 |
| 10584138 | Kcnj1: potassium inwardly-rectifying channel, subfamily J, member 1       | NM_001168354 | 1.708200814 | 0.009413332 |
| 10484237 | Zfp385b: zinc finger protein 385B                                         | NM_178723    | 2.226669428 | 0.009449778 |
| 10369844 | Bicc1: bicaudal C homolog 1 (Drosophila)                                  | NM_031397    | 1.542323774 | 0.009477202 |
| 10447356 | Socs5: suppressor of cytokine signaling 5                                 | NM_019654    | 1.976728199 | 0.009581045 |
| 10566686 | Olfr490: olfactory receptor 490                                           | NM_146498    | 1.802946651 | 0.009611375 |
| 10437765 | Cpped1: calcineurin-like phosphoesterase domain containing 1              | NM_146067    | 1.575040169 | 0.009770667 |
| 10571142 | Gpr124: G protein-coupled receptor 124                                    | NM_054044    | 1.66705892  | 0.009781979 |
| 10467068 | Sgms1: sphingomyelin synthase 1                                           | NM_001168525 | 1.934158007 | 0.009902849 |
| 10593159 | Pafah1b2: platelet-activating factor acetylhydrolase, isoform 1b, subunit | NM_008775    | 1.811506106 | 0.009912039 |
| 10504422 | Olfr155: olfactory receptor 155                                           | NM_019473    | 1.800982997 | 0.010019166 |
| 10400967 | Six1: sine oculis-related homeobox 1 homolog (Drosophila)                 | NM_009189    | 1.93995644  | 0.01012216  |
| 10407833 | Ggps1: geranylgeranyl diphosphate synthase 1                              | NM_010282    | 1.636788304 | 0.01014866  |
| 10463227 | Gm6937: predicted pseudogene 6937                                         | BC089359     | 1.654519671 | 0.010278967 |
| 10457644 | Cdh2: cadherin 2                                                          | NM_007664    | 1.561116401 | 0.010340929 |
| 10460371 | Ptprcap: protein tyrosine phosphatase, receptor type, C polypeptide-a     | NM_016933    | 1.857160886 | 0.010504522 |
| 10604958 | Magea10: melanoma antigen family A, 10                                    | NM_001085506 | 1.737466986 | 0.010600388 |
| 10369116 | Mcm9: minichromosome maintenance complex component 9                      | NM_027830    | 1.746749376 | 0.010612798 |
| 10473622 | Olfr1255: olfactory receptor 1255                                         | NM_146977    | 1.794382914 | 0.010672869 |
| 10570573 | Agpat5: 1-acylglycerol-3-phosphate O-acyltransferase 5 (lysophosphat      | NM_026792    | 1.520519077 | 0.010684195 |
| 10498500 | Vmn2r1: vomeronasal 2, receptor 1                                         | NM_019918    | 2.179607176 | 0.010826711 |
| 10508454 | Bsdcl: BSD domain containing 1                                            | NM_133889    | 1.543654647 | 0.01084101  |
| 10433088 | Cbx5: chromobox homolog 5 (Drosophila HP1a)                               | NM_007626    | 1.552092439 | 0.010876249 |
| 10437942 | Ube2v2: ubiquitin-conjugating enzyme E2 variant 2                         | NM_023585    | 2.157478897 | 0.010880205 |
| 10368670 | Amd1: S-adenosylmethionine decarboxylase 1                                | NM_009665    | 1.527240895 | 0.010948528 |
| 10492846 | Pet112l: PET112-like (yeast)                                              | NM_144896    | 1.819084193 | 0.010969512 |
| 10585428 | Dnaja4: DnaJ (Hsp40) homolog, subfamily A, member 4                       | NM_021422    | 1.595720474 | 0.010982673 |
| 10403248 | Speer6-ps1: spermatogenesis associated glutamate (E)-rich protein 6,      | NR_001581    | 1.981896357 | 0.011127812 |
| 10566417 | Olfr675: olfactory receptor 675                                           | NM_001011848 | 1.805487748 | 0.011167746 |
| 10422854 | Nup155: nucleoporin 155                                                   | NM_133227    | 1.788359    | 0.011182181 |
| 10532741 | Tmem119: transmembrane protein 119                                        | NM_146162    | 2.037529995 | 0.011198259 |
| 10409905 | Ctsr: cathepsin R                                                         | NM_020284    | 1.583988772 | 0.011217643 |
| 10470296 | Mir126: microRNA 126                                                      | NR_029541    | 1.752866291 | 0.011244119 |
| 10592515 | Ubash3b: ubiquitin associated and SH3 domain containing, B                | NM_176860    | 2.143771842 | 0.011287365 |
| 10354868 | Fam126b: family with sequence similarity 126, member B                    | NM_172513    | 1.615819366 | 0.011308605 |
| 10522024 | Tbc1d1: TBC1 domain family, member 1                                      | NM_019636    | 2.013598681 | 0.011345015 |
| 10514985 | Zyg11b: zyg-11 homolog B (C. elegans)                                     | NM_001033634 | 2.254898187 | 0.011445906 |
| 10455813 | Lmnb1: lamin B1                                                           | NM_010721    | 1.723828556 | 0.011473942 |
| 10382284 | Prkar1a: protein kinase, cAMP dependent regulatory, type I, alpha         | NM_021880    | 1.850193058 | 0.011494232 |
| 10458555 | Spry4: sprouty homolog 4 (Drosophila)                                     | NM_011898    | 1.983547926 | 0.01150069  |
| 10532275 | Smndc1: survival motor neuron domain containing 1                         | NM_172429    | 1.969377829 | 0.011525925 |
| 10468311 | Sh3pxd2a: SH3 and PX domains 2A                                           | NM_008018    | 1.934300486 | 0.011552877 |
| 10422244 | Slitrk6: SLIT and NTRK-like family, member 6                              | NM_175499    | 1.962999131 | 0.011565332 |
| 10576661 | Itgb1: integrin beta 1 (fibronectin receptor beta)                        | NM_010578    | 1.706264474 | 0.011580218 |
| 10608138 | Ddx3y: DEAD (Asp-Glu-Ala-Asp) box polypeptide 3, Y-linked                 | NM_012008    | 1.59278544  | 0.011581449 |
| 10421685 | Serp2: stress-associated endoplasmic reticulum protein family member      | NR_027699    | 1.919281971 | 0.011621316 |
| 10603109 | Piga: phosphatidylinositol glycan anchor biosynthesis, class A            | NM_011081    | 1.825008094 | 0.011707907 |
| 10436442 | Fam60a: family with sequence similarity 60, member A                      | NM_019643    | 1.621421021 | 0.011745126 |
| 10480878 | Camsap1: calmodulin regulated spectrin-associated protein 1               | NM_001115076 | 1.550484815 | 0.011861566 |
| 10558285 | Zranb1: zinc finger, RAN-binding domain containing 1                      | NM_207302    | 2.250266972 | 0.011893862 |
| 10346298 | Coq10b: coenzyme Q10 homolog B (S. cerevisiae)                            | NM_001039710 | 1.571426875 | 0.011907355 |
| 10548667 | Tas2r136: taste receptor, type 2, member 136                              | NM_181276    | 2.013557421 | 0.011927845 |

|          |                                                                       |              |             |             |
|----------|-----------------------------------------------------------------------|--------------|-------------|-------------|
| 10476886 | Sstr4: somatostatin receptor 4                                        | NM_009219    | 1.988686585 | 0.012036438 |
| 10417492 | Gm5458: predicted gene 5458                                           | NM_001024706 | 1.64979197  | 0.012054832 |
| 10487564 | Zc3h8: zinc finger CCCH type containing 8                             | NM_020594    | 2.208878444 | 0.012179519 |
| 10591517 | Cdkn2d: cyclin-dependent kinase inhibitor 2D (p19, inhibits CDK4)     | NM_009878    | 1.562025554 | 0.012246702 |
| 10485294 | Hsd17b12: hydroxysteroid (17-beta) dehydrogenase 12                   | NM_019657    | 1.696141282 | 0.012247913 |
| 10399198 | Ncoa4: nuclear receptor coactivator 4                                 | NM_019744    | 1.77637106  | 0.012356564 |
| 10368748 | Amd1: S-adenosylmethionine decarboxylase 1                            | NM_009665    | 1.527275001 | 0.012367583 |
| 10545038 | Vmn1r30: vomeronasal 1 receptor 30                                    | NM_134177    | 2.179317351 | 0.012377641 |
| 10498350 | P2ry14: purinergic receptor P2Y, G-protein coupled, 14                | NM_133200    | 1.810872742 | 0.012386829 |
| 10445953 | Emr4: EGF-like module containing, mucin-like, hormone receptor-like   | NM_139138    | 1.607531272 | 0.012428018 |
| 10388290 | Olfir393: olfactory receptor 393                                      | NM_147008    | 1.802264843 | 0.012483154 |
| 10565330 | Zfand6: zinc finger, AN1-type domain 6                                | NM_022985    | 2.210388428 | 0.012545544 |
| 10439208 | Sec22a: SEC22 vesicle trafficking protein homologue A (S. cerevisiae) | NM_133704    | 1.897631514 | 0.012643187 |
| 10476252 | Cdc25b: cell division cycle 25 homolog B (S. pombe)                   | NM_023117    | 1.558379841 | 0.012677379 |
| 10606376 | 2610002M06Rik: RIKEN cDNA 2610002M06 gene                             | NM_025921    | 1.507189965 | 0.012705365 |
| 10540265 | Mitf: microphthalmia-associated transcription factor                  | NM_001113198 | 1.760758934 | 0.012900883 |
| 10359961 | Uhmk1: U2AF homology motif (UHM) kinase 1                             | NM_010633    | 2.163886188 | 0.012918959 |
| 10541910 | Vwfr: Von Willebrand factor homolog                                   | NM_011708    | 2.191051498 | 0.013059253 |
| 10345777 | Il1rl2: interleukin 1 receptor-like 2                                 | NM_133193    | 1.70315856  | 0.01310813  |
| 10522712 | Rest: RE1-silencing transcription factor                              | NM_011263    | 1.878161404 | 0.013108396 |
| 10506843 | Cc2d1b: coiled-coil and C2 domain containing 1B                       | NM_177045    | 1.552427303 | 0.013190593 |
| 10541112 | Hnrnpf: heterogeneous nuclear ribonucleoprotein F                     | BC018185     | 1.694469208 | 0.013313643 |
| 10528880 | Lmbr1: limb region 1                                                  | NM_020295    | 1.723088937 | 0.01331607  |
| 10440669 | 2310057N15Rik: RIKEN cDNA 2310057N15 gene                             | BC104341     | 1.506472888 | 0.013441187 |
| 10539773 | Gfpt1: glutamine fructose-6-phosphate transaminase 1                  | NM_013528    | 1.635469725 | 0.013476442 |
| 10498907 | Glrb: glycine receptor, beta subunit                                  | NM_010298    | 1.638979217 | 0.013518524 |
| 10396125 | Atl1: atlastin GTPase 1                                               | NM_178628    | 1.538378029 | 0.013680089 |
| 10442292 | Vmn2r113: vomeronasal 2, receptor 113                                 | NM_001104578 | 2.18286518  | 0.013725773 |
| 10542650 | Golt1b: golgi transport 1 homolog B (S. cerevisiae)                   | NM_025872    | 1.665482816 | 0.01378129  |
| 10582123 | Hsd1l: hydroxysteroid dehydrogenase like 1                            | NM_175185    | 1.696460997 | 0.013969971 |
| 10380109 | Hsf5: heat shock transcription factor family member 5                 | NM_001045527 | 1.696460997 | 0.013969971 |
| 10360957 | Kctd3: potassium channel tetramerisation domain containing 3          | NM_172650    | 1.708887222 | 0.013989399 |
| 10589929 | Cmtm6: CKLF-like MARVEL transmembrane domain containing 6             | NM_026036    | 1.569849634 | 0.014046873 |
| 10354432 | Myo1b: myosin IB                                                      | NM_001161817 | 1.773993076 | 0.014196542 |
| 10422946 | Ranbp3l: RAN binding protein 3-like                                   | NM_198024    | 1.873132737 | 0.014316384 |
| 10500610 | Fam46c: family with sequence similarity 46, member C                  | NM_001142952 | 1.618537257 | 0.014391198 |
| 10352092 | Zfp238: zinc finger protein 238                                       | NM_001012330 | 2.215959574 | 0.014699295 |
| 10467191 | Ankrd1: ankyrin repeat domain 1 (cardiac muscle)                      | NM_013468    | 1.529780829 | 0.014717826 |
| 10528360 | Slc26a5: solute carrier family 26, member 5                           | NM_030727    | 1.946724837 | 0.014723758 |
| 10594840 | Gcom1: GRINL1A complex locus                                          | NM_001033208 | 1.632355437 | 0.01474354  |
| 10531323 | G3bp2: GTPase activating protein (SH3 domain) binding protein 2       | NM_011816    | 1.630921453 | 0.014780202 |
| 10585347 | 4930550C14Rik: RIKEN cDNA 4930550C14 gene                             | BC115639     | 1.510557573 | 0.014800849 |
| 10497203 | Hey1: hairy/enhancer-of-split related with YRPW motif 1               | NM_010423    | 1.682261124 | 0.01482799  |
| 10355227 | 1110028C15Rik: RIKEN cDNA 1110028C15 gene                             | NM_001122738 | 1.501794597 | 0.014858539 |
| 10404836 | Rnf182: ring finger protein 182                                       | NM_183204    | 1.885634646 | 0.014863741 |
| 10598164 | 0610010K06Rik: RIKEN cDNA 0610010K06 gene                             | NM_027861    | 1.501663874 | 0.014871476 |
| 10457040 | Zfp516: zinc finger protein 516                                       | NM_183033    | 2.231070091 | 0.015012592 |
| 10403413 | Idi1: isopentenyl-diphosphate delta isomerase                         | NM_145360    | 1.698975663 | 0.015020929 |
| 10562117 | Ffar2: free fatty acid receptor 2                                     | NM_146187    | 1.624678663 | 0.015453179 |
| 10558992 | Muc2: mucin 2                                                         | NM_023566    | 1.772849946 | 0.015608792 |
| 10351644 | Cd244: CD244 natural killer cell receptor 2B4                         | NM_018729    | 1.55722951  | 0.015671438 |
| 10528200 | Hnrnpa3: heterogeneous nuclear ribonucleoprotein A3                   | NM_053263    | 1.689174485 | 0.015716672 |
| 10538617 | Lanc12: LanC (bacterial lantibiotic synthetase component C)-like 2    | NM_133737    | 1.718154278 | 0.015734923 |
| 10445796 | Al314976: expressed sequence Al314976                                 | BC022574     | 1.521286843 | 0.015875488 |
| 10569998 | Gm5605: predicted gene 5605                                           | XR_031660    | 1.650847085 | 0.015952008 |
| 10481337 | 1700101E01Rik: RIKEN cDNA 1700101E01 gene                             | NM_001166705 | 1.503903259 | 0.015991706 |
| 10489891 | B4galt5: UDP-Gal:betaGlcNAc beta 1,4-galactosyltransferase, polypept  | NM_019835    | 1.541253301 | 0.015995113 |
| 10449920 | Zfp811: zinc finger protein 811                                       | NM_183177    | 2.244304936 | 0.016053826 |
| 10502951 | Acadm: acyl-Coenzyme A dehydrogenase, medium chain                    | NM_007382    | 1.517112712 | 0.016055045 |
| 10420675 | Gucy1b2: guanylate cyclase 1, soluble, beta 2                         | NM_172810    | 1.672730063 | 0.01608441  |
| 10423134 | Zfr: zinc finger RNA binding protein                                  | NM_011767    | 2.246960104 | 0.01617156  |
| 10401997 | Ptpn21: protein tyrosine phosphatase, non-receptor type 21            | NM_011877    | 1.856762716 | 0.016256104 |
| 10404178 | BC005537: cDNA sequence BC005537                                      | NM_024473    | 1.541579607 | 0.016318836 |
| 10529260 | C330019G07Rik: RIKEN cDNA C330019G07 gene                             | NM_194340    | 1.548383681 | 0.01635935  |
| 10361748 | Fbxo30: F-box protein 30                                              | NM_027968    | 1.623474062 | 0.016447455 |

|          |                                                                          |                 |             |             |
|----------|--------------------------------------------------------------------------|-----------------|-------------|-------------|
| 10541484 | M6pr: mannose-6-phosphate receptor, cation dependent                     | NM_010749       | 1.735946059 | 0.016467304 |
| 10531193 | Adamts3: a disintegrin-like and metallopeptidase (reprolysin type) with  | NM_177872       | 1.51848696  | 0.016552815 |
| 10437222 | Hnrnpa3: heterogeneous nuclear ribonucleoprotein A3                      | NM_053263       | 1.689346099 | 0.016964255 |
| 10556442 | Tead1: TEA domain family member 1                                        | NM_001166584    | 2.021620373 | 0.016978472 |
| 10378732 | Crk: v-crk sarcoma virus CT10 oncogene homolog (avian)                   | NM_133656       | 1.576581701 | 0.017033625 |
| 10543680 | Mir182: microRNA 182                                                     | NR_029569       | 1.757094765 | 0.017370944 |
| 10491962 | Foxo1: forkhead box O1                                                   | NM_019739       | 1.626124954 | 0.017387888 |
| 10560242 | C5ar1: complement component 5a receptor 1                                | NM_001173550    | 1.548505432 | 0.017391954 |
| 10435048 | Tctex1d2: Tctex1 domain containing 2                                     | NM_025329       | 2.019411277 | 0.017473194 |
| 10506058 | Inadl: InaD-like (Drosophila)                                            | NM_172696       | 1.705531772 | 0.017496787 |
| 10595863 | Trim42: tripartite motif-containing 42                                   | NM_030219       | 2.118554155 | 0.01757439  |
| 10474490 | Olf1r1283: olfactory receptor 1283                                       | NM_207236       | 1.794459989 | 0.017699234 |
| 10591816 | Dpy19l1: dpy-19-like 1 (C. elegans)                                      | NM_172920       | 1.598168082 | 0.017726338 |
| 10505030 | Fsd1l: fibronectin type III and SPRY domain containing 1-like            | NM_176966       | 1.62713863  | 0.017764928 |
| 10458213 | Etf1: eukaryotic translation termination factor 1                        | NM_144866       | 1.610219479 | 0.017773109 |
| 10428388 | Rspo2: R-spondin 2 homolog (Xenopus laevis)                              | NM_172815       | 1.891652767 | 0.017903961 |
| 10347491 | Wnt6: wingless-related MMTV integration site 6                           | NM_009526       | 2.194503279 | 0.017917002 |
| 10597833 | Sec22c: SEC22 vesicle trafficking protein homolog C (S. cerevisiae)      | NM_178677       | 1.900794204 | 0.017928702 |
| 10585048 | Cadm1: cell adhesion molecule 1                                          | NM_207675       | 1.55031324  | 0.017969761 |
| 10412543 | Gm1973: predicted gene 1973                                              | NM_029288       | 1.644147373 | 0.018139746 |
| 10519855 | Cacna2d1: calcium channel, voltage-dependent, alpha2/delta subunit       | NM_001110843    | 1.549758967 | 0.018161018 |
| 10501265 | Gnai3: guanine nucleotide binding protein (G protein), alpha inhibiting  | NM_010306       | 1.661476413 | 0.018165127 |
| 10570321 | Cul4a: cullin 4A                                                         | NM_146207       | 1.585509401 | 0.018184648 |
| 10401160 | Tmem229b: transmembrane protein 229B                                     | NM_178745       | 2.060798008 | 0.018398541 |
| 10364130 | Zfp280b: zinc finger protein 280B                                        | NM_177475       | 2.221946094 | 0.018428022 |
| 10587085 | BC031353: cDNA sequence BC031353                                         | NM_001113283    | 1.542144233 | 0.018434998 |
| 10526923 | Get4: golgi to ER traffic protein 4 homolog (S. cerevisiae)              | NM_026269       | 1.634311233 | 0.018444525 |
| 10498707 | Slitrk3: SLIT and NTRK-like family, member 3                             | NM_198864       | 1.959186456 | 0.018464984 |
| 10347933 | Sp140: Sp140 nuclear body protein                                        | NM_001013817    | 1.978446818 | 0.018480573 |
| 10466624 | Aldh1a7: aldehyde dehydrogenase family 1, subfamily A7                   | NM_011921       | 1.524805864 | 0.018540775 |
| 10435226 | Snx4: sorting nexin 4                                                    | NM_080557       | 1.974430143 | 0.018592065 |
| 10560111 | Gm5584: predicted gene 5584                                              | NM_001101534    | 1.650328891 | 0.018617804 |
| 10399214 | Rab10: RAB10, member RAS oncogene family                                 | NM_016676       | 1.858531258 | 0.018661274 |
| 10458841 | Ube2l3: ubiquitin-conjugating enzyme E2L 3                               | NM_009456       | 2.156416494 | 0.018686062 |
| 10501778 | Ptbp2: polypyrimidine tract binding protein 2                            | NM_019550       | 1.855401046 | 0.018749031 |
| 10466659 | Gda: guanine deaminase                                                   | NM_010266       | 1.634012295 | 0.018781113 |
| 10531208 | Cox18: COX18 cytochrome c oxidase assembly homolog (S. cerevisiae)       | NM_001163456    | 1.573155362 | 0.018798835 |
| 10594289 | Glce: glucuronyl C5-epimerase                                            | NM_033320       | 1.637560645 | 0.018996687 |
| 10570013 | Abhd13: abhydrolase domain containing 13                                 | NM_001081119    | 1.516093385 | 0.019001114 |
| 10569485 | Tnfrsf26: tumor necrosis factor receptor superfamily, member 26          | NM_175649       | 2.097157856 | 0.019082543 |
| 10379820 | Acaca: acetyl-Coenzyme A carboxylase alpha                               | NM_133360       | 1.516512521 | 0.019089315 |
| 10386824 | Akap10: A kinase (PRKA) anchor protein 10                                | NM_019921       | 1.523339468 | 0.019115293 |
| 10487787 | Gfra4: glial cell line derived neurotrophic factor family receptor alpha | NM_020014       | 1.635701876 | 0.019129893 |
| 10479950 | Celf2: CUGBP, Elav-like family member 2                                  | NM_001110231    | 1.562898138 | 0.019139989 |
| 10385774 | Olf1r1371: olfactory receptor 1371                                       | NM_207253       | 1.798012576 | 0.019176179 |
| 10523281 | Sept11: septin 11                                                        | NM_001009818    | 1.914388945 | 0.019206096 |
| 10529218 | Supt7l: suppressor of Ty 7 (S. cerevisiae)-like                          | NM_028150       | 2.005996077 | 0.019215965 |
| 10368030 | Heca: headcase homolog (Drosophila)                                      | NM_001033432    | 1.679782307 | 0.01922808  |
| 10405488 | Tmed9: transmembrane emp24 protein transport domain containing 9         | NM_026211       | 2.037512894 | 0.019231348 |
| 10489660 | Elmo2: engulfment and cell motility 2, ced-12 homolog (C. elegans)       | NM_207706       | 1.605826554 | 0.019392955 |
| 10521440 | Afap1: actin filament associated protein 1                               | NM_027373       | 1.520016382 | 0.019393591 |
| 10393058 | H3f3b: H3 histone, family 3B                                             | NM_008211       | 1.676811466 | 0.019400341 |
| 10408162 | Zfp322a: zinc finger protein 322A                                        | NM_001111107    | 2.225652801 | 0.019419267 |
| 10408113 | Hist1h4i: histone cluster 1, H4i                                         | NM_175656       | 1.686026833 | 0.019437655 |
| 10376929 | Fam18b: family with sequence similarity 18, member B                     | BC115504        | 1.616950829 | 0.019450075 |
| 10576940 | Fam155a: family with sequence similarity 155, member A                   | AK149049        | 1.616893169 | 0.019556066 |
| 10389326 | Pigw: phosphatidylinositol glycan anchor biosynthesis, class W           | NM_027388       | 1.825269565 | 0.019569398 |
| 10485344 | Api5: apoptosis inhibitor 5                                              | NM_007466       | 1.53037653  | 0.019596016 |
| 10416945 | Mirhg1: microRNA host gene 1 (non-protein coding)                        | NR_029382       | 1.760353508 | 0.019613423 |
| 10469571 | Otud1: OTU domain containing 1                                           | NM_027715       | 1.809973026 | 0.019657215 |
| 10541446 | Cpamd8: C3 and PZP-like, alpha-2-macroglobulin domain containing 8       | NM_008646       | 1.573170732 | 0.019674374 |
| 10348087 | Cops7b: COP9 (constitutive photomorphogenic) homolog, subunit 7b (       | NM_172974       | 1.571032186 | 0.019694813 |
| 10508788 | Ahdcd1: AT hook, DNA binding motif, containing 1                         | NM_146155       | 1.520529908 | 0.01970459  |
| 10535378 | D430018E03Rik: RIKEN cDNA D430018E03 gene                                | ENSMUST00000014 | 1.588150591 | 0.019716339 |
| 10580452 | Siah1a: seven in absentia 1A                                             | NM_009172       | 1.936457012 | 0.019738842 |

|          |                                                                         |                 |             |             |
|----------|-------------------------------------------------------------------------|-----------------|-------------|-------------|
| 10424062 | A930017M01Rik: RIKEN cDNA A930017M01 gene                               | NR_033609       | 1.515638477 | 0.019994179 |
| 10548735 | Dusp16: dual specificity phosphatase 16                                 | NM_130447       | 1.602296753 | 0.019998295 |
| 10544444 | Eapa2: experimental autoimmune prostatitis antigen 2                    | NM_203396       | 1.602997732 | 0.020027739 |
| 10499948 | Lce3a: late cornified envelope 3A                                       | NM_001039594    | 1.719270596 | 0.020085284 |
| 10489413 | Tomm34: translocase of outer mitochondrial membrane 34                  | NM_025996       | 2.099773115 | 0.020107021 |
| 10406226 | Hnrnpa1l2: heterogeneous nuclear ribonucleoprotein A1-like 2            | XM_619124       | 1.689077465 | 0.020142048 |
| 10495685 | Arhgap29: Rho GTPase activating protein 29                              | NM_172525       | 1.532021065 | 0.0201588   |
| 10434302 | Klhl24: kelch-like 24 (Drosophila)                                      | NM_029436       | 1.715493983 | 0.020173374 |
| 10545450 | Tgoln1: trans-golgi network protein                                     | NM_009443       | 2.031970862 | 0.020175786 |
| 10564624 | St8sia2: ST8 alpha-N-acetyl-neuraminide alpha-2,8-sialyltransferase 2   | NM_009181       | 1.994841806 | 0.020194109 |
| 10419674 | Snord8: small nucleolar RNA, C/D box 8                                  | NR_028542       | 1.972749664 | 0.020325033 |
| 10577633 | Golga7: golgi autoantigen, golgin subfamily a, 7                        | NM_020585       | 1.662779302 | 0.02033986  |
| 10416023 | Scara5: scavenger receptor class A, member 5 (putative)                 | NM_028903       | 1.8958469   | 0.020364938 |
| 10395538 | Pnpla8: patatin-like phospholipase domain containing 8                  | NM_026164       | 1.8387684   | 0.020365748 |
| 10510708 | Icmt: isoprenylcysteine carboxyl methyltransferase                      | NM_133788       | 1.698732139 | 0.020501831 |
| 10365471 | Fbxo7: F-box protein 7                                                  | NM_153195       | 1.624127798 | 0.020664386 |
| 10469278 | Il2ra: interleukin 2 receptor, alpha chain                              | NM_008367       | 1.704638231 | 0.020672461 |
| 10569646 | Ccnd1: cyclin D1                                                        | NM_007631       | 1.556227403 | 0.020735234 |
| 10603698 | Gm1549: predicted gene 1549                                             | AJ319753        | 1.643038634 | 0.02080873  |
| 10531197 | Adamts3: a disintegrin-like and metallopeptidase (reprolysin type) with | NM_177872       | 1.519506999 | 0.020912531 |
| 10466372 | Olfr1504: olfactory receptor 1504                                       | NM_146634       | 1.799656949 | 0.021114709 |
| 10481827 | Zbtb34: zinc finger and BTB domain containing 34                        | NM_001085507    | 2.204844576 | 0.021123754 |
| 10438815 | 1600021P15Rik: RIKEN cDNA 1600021P15 gene                               | NM_177718       | 1.503115069 | 0.021202547 |
| 10383833 | Ccdc157: coiled-coil domain containing 157                              | NM_177616       | 1.553420194 | 0.02120611  |
| 10601760 | Hnrnp2: heterogeneous nuclear ribonucleoprotein H2                      | NM_019868       | 1.694778189 | 0.021264685 |
| 10346551 | Cflar: CASP8 and FADD-like apoptosis regulator                          | NM_207653       | 1.565657065 | 0.021379692 |
| 10463070 | Entpd1: ectonucleoside triphosphate diphosphohydrolase 1                | NM_009848       | 1.607610103 | 0.021546119 |
| 10544250 | E330009J07Rik: RIKEN cDNA E330009J07 gene                               | ENSMUST00000101 | 1.602754528 | 0.021649409 |
| 10542575 | Pde3a: phosphodiesterase 3A, cGMP inhibited                             | NM_018779       | 1.816384455 | 0.021679858 |
| 10542407 | Pde6h: phosphodiesterase 6H, cGMP-specific, cone, gamma                 | NM_023898       | 1.816384455 | 0.021679858 |
| 10386470 | 4930412M03Rik: RIKEN cDNA 4930412M03 gene                               | ENSMUST00000057 | 1.509265846 | 0.021796467 |
| 10498337 | Clrn1: clarin 1                                                         | NM_153384       | 1.569129474 | 0.021921856 |
| 10572880 | Tom1: target of myb1 homolog (chicken)                                  | NM_011622       | 2.099429688 | 0.021930113 |
| 10402249 | Atxn3: ataxin 3                                                         | NM_029705       | 1.540111105 | 0.021954142 |
| 10479794 | Prpf18: PRP18 pre-mRNA processing factor 18 homolog (yeast)             | NM_026045       | 1.855269979 | 0.022109393 |
| 10482336 | Lrp1b: low density lipoprotein-related protein 1B (deleted in tumors)   | NM_053011       | 1.730138548 | 0.022158753 |
| 10521972 | Pcdh7: protocadherin 7                                                  | NM_018764       | 1.815914609 | 0.022181504 |
| 10391348 | Fam134c: family with sequence similarity 134, member C                  | BC016089        | 1.615986217 | 0.022255791 |
| 10507284 | Gm12950: predicted gene 12950                                           | XR_031009       | 1.642328016 | 0.022279005 |
| 10366052 | Kitl: kit ligand                                                        | NM_013598       | 1.713542339 | 0.02234109  |
| 10515164 | Cmpk1: cytidine monophosphate (UMP-CMP) kinase 1                        | NM_025647       | 1.569325837 | 0.022505978 |
| 10516551 | S100pbp: S100P binding protein                                          | NM_029036       | 1.893285337 | 0.022517527 |
| 10345083 | Khdc1b: KH domain containing 1B                                         | NM_001113187    | 1.711540411 | 0.022533871 |
| 10394671 | Gm16497: predicted gene 16497                                           | AY512908        | 1.643679308 | 0.02254898  |
| 10592382 | Olfr934: olfactory receptor 934                                         | NM_146442       | 1.806532347 | 0.022589072 |
| 10511975 | Slc35a1: solute carrier family 35 (CMP-sialic acid transporter), member | NM_011895       | 1.952780229 | 0.022671795 |
| 10362803 | Cd164: CD164 antigen                                                    | NM_016898       | 1.557190134 | 0.022709478 |
| 10520952 | Ppp1cb: protein phosphatase 1, catalytic subunit, beta isoform          | NM_172707       | 1.847928616 | 0.022714764 |
| 10463737 | Ina: internexin neuronal intermediate filament protein, alpha           | ENSMUST00000037 | 1.705353479 | 0.022744092 |
| 10498599 | Ift80: intraflagellar transport 80 homolog (Chlamydomonas)              | NM_026641       | 1.700677723 | 0.022786633 |
| 10435841 | Ccdc52: coiled-coil domain containing 52                                | NM_144550       | 1.554390155 | 0.022826971 |
| 10381934 | Tanc2: tetratricopeptide repeat, ankyrin repeat and coiled-coil contain | NM_181071       | 2.012533247 | 0.02290332  |
| 10385052 | Ranbp17: RAN binding protein 17                                         | NM_023146       | 1.873098951 | 0.022913237 |
| 10602428 | Wnk3: WNK lysine deficient protein kinase 3                             | ENSMUST00000096 | 2.191848397 | 0.022925219 |
| 10469335 | Stam: signal transducing adaptor molecule (SH3 domain and ITAM mo       | NM_011484       | 1.995358647 | 0.022934127 |
| 10580649 | Es22: esterase 22                                                       | NM_133660       | 1.610003112 | 0.023070901 |
| 10506050 | Nfia: nuclear factor I/A                                                | NM_001122952    | 1.78028028  | 0.023268688 |
| 10592457 | Olfr976: olfactory receptor 976                                         | NM_146367       | 1.807493333 | 0.02328974  |
| 10358754 | Gm7278: predicted gene 7278                                             | XR_002131       | 1.656766391 | 0.023341634 |
| 10404702 | Gcnt2: glucosaminyl (N-acetyl) transferase 2, I-branching enzyme        | NM_023887       | 1.631447432 | 0.023418586 |
| 10403558 | Ero1lb: ERO1-like beta (S. cerevisiae)                                  | NM_026184       | 1.609215852 | 0.023495976 |
| 10512847 | Alg2: asparagine-linked glycosylation 2 homolog (yeast, alpha-1,3-mar   | NM_019998       | 1.5255942   | 0.023511424 |
| 10563355 | Sec1: secretory blood group 1                                           | NM_019934       | 1.896765381 | 0.023512674 |
| 10357472 | Cxcr4: chemokine (C-X-C motif) receptor 4                               | NM_009911       | 1.585706082 | 0.023529526 |
| 10517173 | Ccdc21: coiled-coil domain containing 21                                | NM_144527       | 1.553801382 | 0.023573143 |

|          |                                                                          |                 |             |             |
|----------|--------------------------------------------------------------------------|-----------------|-------------|-------------|
| 10490773 | Hnrnp2: heterogeneous nuclear ribonucleoprotein H2                       | NM_019868       | 1.694899932 | 0.023646003 |
| 10504817 | Tgfr1: transforming growth factor, beta receptor I                       | NM_009370       | 2.025739987 | 0.02368021  |
| 10434733 | Eif4a2: eukaryotic translation initiation factor 4A2                     | NM_013506       | 1.605556633 | 0.023690809 |
| 10422179 | Pou4f1: POU domain, class 4, transcription factor 1                      | NM_011143       | 1.847174133 | 0.023694931 |
| 10415377 | 2610027L16Rik: RIKEN cDNA 2610027L16 gene                                | NM_026403       | 1.508253983 | 0.023729776 |
| 10388869 | Tnfr1: tumor necrosis factor, alpha-induced protein 1 (endothelial)      | NM_009395       | 2.094664148 | 0.02373848  |
| 10532944 | Mlec: malectin                                                           | NM_175403       | 1.761841637 | 0.023758964 |
| 10378126 | Ankyr1: ankyrin repeat and FYVE domain containing 1                      | NM_009671       | 1.529013204 | 0.023818971 |
| 10600726 | Mageb1: melanoma antigen, family B, 1                                    | NM_010759       | 1.737502067 | 0.023899877 |
| 10607841 | Tceanc: transcription elongation factor A (SII) N-terminal and central d | NM_001007577    | 2.018631458 | 0.024077118 |
| 10458834 | Atg12: autophagy-related 12 (yeast)                                      | NM_026217       | 1.538207597 | 0.024175434 |
| 10397145 | Acot2: acyl-CoA thioesterase 2                                           | NM_134188       | 1.517169061 | 0.024203192 |
| 10557009 | Eef2k: eukaryotic elongation factor-2 kinase                             | NM_007908       | 1.604030432 | 0.024208932 |
| 10454478 | Polr2d: polymerase (RNA) II (DNA directed) polypeptide D                 | NM_027002       | 1.842489074 | 0.024360535 |
| 10414417 | Peli2: pellino 2                                                         | NM_033602       | 1.818683681 | 0.024544893 |
| 10453573 | Olfir3: olfactory receptor 3                                             | NM_146937       | 1.80465127  | 0.024600637 |
| 10586614 | C2cd4b: C2 calcium-dependent domain containing 4B                        | NM_001081314    | 1.547183831 | 0.024611563 |
| 10474508 | Olfir1299: olfactory receptor 1299                                       | NM_146884       | 1.794990154 | 0.024815346 |
| 10458098 | Pkd2l2: polycystic kidney disease 2-like 2                               | NM_016927       | 1.831632653 | 0.024842666 |
| 10352777 | Slc30a1: solute carrier family 30 (zinc transporter), member 1           | NM_009579       | 1.947376261 | 0.024885894 |
| 10465812 | Ttc9c: tetratricopeptide repeat domain 9C                                | NM_027412       | 2.138703091 | 0.024898382 |
| 10554323 | Mir9-3: microRNA 9-3                                                     | NR_029818       | 1.759687106 | 0.024906603 |
| 10393881 | Mafg: v-maf musculoaponeurotic fibrosarcoma oncogene family, proto       | NM_010756       | 1.737033921 | 0.024928451 |
| 10420637 | Kpna3: karyopherin (importin) alpha 3                                    | NM_008466       | 1.717406589 | 0.024965104 |
| 10449284 | Dusp1: dual specificity phosphatase 1                                    | NM_013642       | 1.599888746 | 0.02509238  |
| 10536746 | Arf5: ADP-ribosylation factor 5                                          | NM_007480       | 1.531978022 | 0.025099813 |
| 10417759 | Ube2e2: ubiquitin-conjugating enzyme E2E 2 (UBC4/5 homolog, yeast        | NM_144839       | 2.146750918 | 0.02510939  |
| 10577641 | 1810011O10Rik: RIKEN cDNA 1810011O10 gene                                | NM_026931       | 1.5040257   | 0.025130134 |
| 10440238 | Nsun3: NOL1/NOP2/Sun domain family member 3                              | NM_178925       | 1.784860558 | 0.025184176 |
| 10434778 | Rtp4: receptor transporter protein 4                                     | NM_023386       | 1.892038827 | 0.025189869 |
| 10394862 | Asap2: ArfGAP with SH3 domain, ankyrin repeat and PH domain 2            | NM_001135192    | 1.535700119 | 0.025229012 |
| 10363265 | Lims1: LIM and senescent cell antigen-like domains 1                     | NM_026148       | 1.722299754 | 0.025262572 |
| 10528901 | C79130: expressed sequence C79130                                        | AK147752        | 1.54886258  | 0.025276332 |
| 10600593 | Hnrnpa3: heterogeneous nuclear ribonucleoprotein A3                      | NM_053263       | 1.692654    | 0.025300523 |
| 10366293 | Csrp2: cysteine and glycine-rich protein 2                               | NM_007792       | 1.580633839 | 0.025358073 |
| 10544017 | Svopl: SV2 related protein homolog (rat)-like                            | NM_177200       | 2.009789103 | 0.025413912 |
| 10570955 | Golga7: golgi autoantigen, golgin subfamily a, 7                         | NM_020585       | 1.664493268 | 0.025475715 |
| 10444589 | Hspa1a: heat shock protein 1A                                            | NM_010479       | 1.696661354 | 0.02554515  |
| 10390473 | Pip4k2b: phosphatidylinositol-5-phosphate 4-kinase, type II, beta        | NM_054051       | 1.829113246 | 0.02570994  |
| 10480492 | Ca2v1b: calcium channel, voltage-dependent, N type, alpha 1B subunit     | NM_001042528    | 1.549373152 | 0.02573502  |
| 10493916 | Flg2: filaggrin family member 2                                          | NM_001013804    | 1.625415815 | 0.025741744 |
| 10422272 | Sox21: SRY-box containing gene 21                                        | NM_177753       | 1.977320452 | 0.025748935 |
| 10462521 | Pten: phosphatase and tensin homolog                                     | NM_008960       | 1.856557887 | 0.025765889 |
| 10404187 | Tdp2: tyrosyl-DNA phosphodiesterase 2                                    | NM_019551       | 2.020761796 | 0.025851473 |
| 10413839 | Ncoa4: nuclear receptor coactivator 4                                    | NM_001033988    | 1.776203274 | 0.025900648 |
| 10400981 | D830013O20Rik: RIKEN cDNA D830013O20 gene                                | ENSMUST00000070 | 1.588910561 | 0.026191398 |
| 10555919 | Olfir692: olfactory receptor 692                                         | NM_146355       | 1.805617701 | 0.026404844 |
| 10363161 | Tmem229b: transmembrane protein 229B                                     | NM_178745       | 2.065341213 | 0.026436082 |
| 10352393 | Srp9: signal recognition particle 9                                      | NM_012058       | 1.985387238 | 0.026452088 |
| 10387180 | Ndel1: nuclear distribution gene E-like homolog 1 (A. nidulans)          | NM_023668       | 1.776782524 | 0.026476643 |
| 10508974 | Pafah2: platelet-activating factor acetylhydrolase 2                     | NM_133880       | 1.812310121 | 0.026536225 |
| 10581729 | Ddx19a: DEAD (Asp-Glu-Ala-Asp) box polypeptide 19a                       | NM_007916       | 1.590101354 | 0.026542995 |
| 10582287 | Car5a: carbonic anhydrase 5a, mitochondrial                              | NM_007608       | 1.550994015 | 0.026579416 |
| 10415092 | 4930579G18Rik: RIKEN cDNA 4930579G18 gene                                | ENSMUST00000038 | 1.510776477 | 0.026620916 |
| 10394040 | Csnk1d: casein kinase 1, delta                                           | NM_027874       | 1.580495905 | 0.026724662 |
| 10448811 | Cramp1l: Crm, cramped-like (Drosophila)                                  | NM_020608       | 1.575946217 | 0.026760451 |
| 10564573 | Chd2: chromodomain helicase DNA binding protein 2                        | NM_001081345    | 1.566394645 | 0.026768745 |
| 10409376 | Hk3: hexokinase 3                                                        | NM_001033245    | 1.688158548 | 0.026842549 |
| 10428302 | Klf10: Kruppel-like factor 10                                            | NM_013692       | 1.71359078  | 0.026940885 |
| 10533569 | Kdm2b: lysine (K)-specific demethylase 2B                                | NM_001003953    | 1.71027275  | 0.027016952 |
| 10545672 | Mthfd2: methylenetetrahydrofolate dehydrogenase (NAD+ dependent)         | NM_008638       | 1.771985931 | 0.027042221 |
| 10522192 | Nsun7: NOL1/NOP2/Sun domain family, member 7                             | NM_027602       | 1.785581129 | 0.027191281 |
| 10555848 | Trim6: tripartite motif-containing 6                                     | NM_001013616    | 2.120337557 | 0.027256384 |
| 10460573 | Eif1ad: eukaryotic translation initiation factor 1A domain containing    | NM_027236       | 1.605282974 | 0.027258813 |
| 10546510 | Lrig1: leucine-rich repeats and immunoglobulin-like domains 1            | NM_008377       | 1.729726009 | 0.027405334 |



|          |                                                                                                           |                 |             |             |
|----------|-----------------------------------------------------------------------------------------------------------|-----------------|-------------|-------------|
| 10560117 | Gm6955: predicted gene 6955                                                                               | ENSMUST00000098 | 1.654609262 | 0.027459878 |
| 10567022 | Btbd10: BTB (POZ) domain containing 10                                                                    | NM_133700       | 1.543731579 | 0.027461517 |
| 10444386 | Gpsm3: G-protein signalling modulator 3 (AGS3-like, <i>C. elegans</i> )                                   | NM_134116       | 1.671722365 | 0.027511654 |
| 10380629 | Hoxb8: homeobox B8                                                                                        | NM_010461       | 1.696103896 | 0.027536283 |
| 10383684 | Limk2: LIM motif-containing protein kinase 2                                                              | NM_010718       | 1.721822864 | 0.027598107 |
| 10489078 | Dsn1: DSN1, MIND kinetochore complex component, homolog ( <i>S. cerevisiae</i> )                          | NM_025853       | 1.598761583 | 0.027669268 |
| 10455514 | Kcnn2: potassium intermediate/small conductance calcium-activated channel subfamily C member 2            | NM_080465       | 1.708324025 | 0.027710202 |
| 10353899 | Sema4c: sema domain, immunoglobulin domain (Ig), transmembrane type I domain containing 4c                | NM_001126047    | 1.903855121 | 0.027755087 |
| 10452556 | Rab12: RAB12, member RAS oncogene family                                                                  | NM_024448       | 1.858781405 | 0.027772184 |
| 10494200 | Cdc42se1: CDC42 small effector 1                                                                          | NM_172395       | 1.560367443 | 0.027802884 |
| 10562368 | 4931406P16Rik: RIKEN cDNA 4931406P16 gene                                                                 | BC060233        | 1.512147387 | 0.027817194 |
| 10604974 | Cetn2: centrin 2                                                                                          | NM_019405       | 1.563066007 | 0.027825527 |
| 10496169 | Ppa2: pyrophosphatase (inorganic) 2                                                                       | NM_146141       | 1.847432655 | 0.027956879 |
| 10402117 | Rps6ka5: ribosomal protein S6 kinase, polypeptide 5                                                       | NM_153587       | 1.888570357 | 0.027988955 |
| 10500896 | Gm6485: predicted gene 6485                                                                               | XR_002221       | 1.652751706 | 0.028037207 |
| 10358698 | Rnf2: ring finger protein 2                                                                               | NM_011277       | 1.886780553 | 0.028112474 |
| 10537499 | Tas2r137: taste receptor, type 2, member 137                                                              | NM_001025385    | 2.013584282 | 0.028128204 |
| 10581737 | Ddx19b: DEAD (Asp-Glu-Ala-Asp) box polypeptide 19b                                                        | NM_172284       | 1.5919387   | 0.028197092 |
| 10481393 | Zdhhc12: zinc finger, DHHC domain containing 12                                                           | NM_025428       | 2.210062831 | 0.028266875 |
| 10567043 | Rras2: related RAS viral (r-ras) oncogene homolog 2                                                       | NM_025846       | 1.891584925 | 0.028442    |
| 10414479 | Olfr740: olfactory receptor 740                                                                           | NM_146667       | 1.805800186 | 0.028551148 |
| 10602716 | Ubqln2: ubiquilin 2                                                                                       | NM_018798       | 2.163807024 | 0.028578807 |
| 10545760 | Paip2b: poly(A) binding protein interacting protein 2B                                                    | NM_146169       | 1.814168324 | 0.028617798 |
| 10543204 | Tmem168: transmembrane protein 168                                                                        | NM_028990       | 2.037762773 | 0.028632745 |
| 10451650 | Nfya: nuclear transcription factor-Y alpha                                                                | NM_001110832    | 1.780554094 | 0.028710834 |
| 10439268 | Dtx3l: dexteX 3-like ( <i>Drosophila</i> )                                                                | NM_001013371    | 1.599503207 | 0.028776782 |
| 10389238 | Dusp14: dual specificity phosphatase 14                                                                   | NM_019819       | 1.600749671 | 0.028844717 |
| 10542317 | Cdkn1b: cyclin-dependent kinase inhibitor 1B                                                              | NM_009875       | 1.561860773 | 0.028906362 |
| 10456120 | Csnk1a1: casein kinase 1, alpha 1                                                                         | NM_146087       | 1.5798183   | 0.028935942 |
| 10404049 | Hist1h3d: histone cluster 1, H3d                                                                          | NM_178204       | 1.684186498 | 0.029083797 |
| 10377550 | Trp53: transformation related protein 53                                                                  | NM_001127233    | 2.121682048 | 0.029133399 |
| 10389627 | Rad51c: RAD51 homolog c ( <i>S. cerevisiae</i> )                                                          | NM_053269       | 1.872250297 | 0.029182367 |
| 10453256 | Kcng3: potassium voltage-gated channel, subfamily G, member 3                                             | NM_153512       | 1.707151547 | 0.02922126  |
| 10474207 | Fbxo3: F-box protein 3                                                                                    | NM_212433       | 1.623330342 | 0.029273122 |
| 10576124 | Ctu2: cytosolic thioluridylase subunit 2 homolog ( <i>S. pombe</i> )                                      | NM_153775       | 1.584715822 | 0.029281578 |
| 10368720 | Slc16a10: solute carrier family 16 (monocarboxylic acid transporters), member 10                          | NM_001114332    | 1.940827071 | 0.029286071 |
| 10446739 | Clip4: CAP-GLY domain containing linker protein family, member 4                                          | NM_030179       | 1.569012562 | 0.029366867 |
| 10566926 | Rnf141: ring finger protein 141                                                                           | NM_025999       | 1.883040936 | 0.029430356 |
| 10413989 | Gm626: predicted gene 626                                                                                 | XM_985917       | 1.651500158 | 0.029515279 |
| 10354677 | Ankrd44: ankyrin repeat domain 44                                                                         | NM_001081433    | 1.529838929 | 0.029575675 |
| 10585358 | Npat: nuclear protein in the AT region                                                                    | NM_001081152    | 1.781979188 | 0.02964377  |
| 10554057 | Adamts17: a disintegrin-like and metalloproteinase (reprolysin type) with thrombospondin type 1 motifs 17 | NM_001033877    | 1.518226328 | 0.029725333 |
| 10528527 | Fam126a: family with sequence similarity 126, member A                                                    | NM_053090       | 1.614285714 | 0.029732717 |
| 10458992 | C330018D20Rik: RIKEN cDNA C330018D20 gene                                                                 | NM_029909       | 1.547479387 | 0.029836217 |
| 10471770 | Olfr357: olfactory receptor 357                                                                           | NM_146623       | 1.800992083 | 0.02990865  |
| 10357064 | Vps4b: vacuolar protein sorting 4b (yeast)                                                                | NM_009190       | 2.184706184 | 0.030494607 |
| 10535852 | Slc7a1: solute carrier family 7 (cationic amino acid transporter, y+ system) member 1                     | NM_007513       | 1.955973311 | 0.030522117 |
| 10542112 | Clec2h: C-type lectin domain family 2, member h                                                           | NM_053165       | 1.568114608 | 0.030537753 |
| 10408156 | Vmn1r217: vomeronasal 1 receptor 217                                                                      | NM_134239       | 2.177539254 | 0.030569625 |
| 10422280 | Abcc4: ATP-binding cassette, sub-family C (CFTR/MRP), member 4                                            | NM_001033336    | 1.516086706 | 0.030605211 |
| 10595856 | Slc25a36: solute carrier family 25, member 36                                                             | NM_138756       | 1.945302469 | 0.030625318 |
| 10516241 | Maneal: mannosidase, endo-alpha-like                                                                      | NM_001007573    | 1.739846126 | 0.030704874 |
| 10426110 | Pim3: proviral integration site 3                                                                         | NM_145478       | 1.82698344  | 0.030805533 |
| 10373530 | Cdk2: cyclin-dependent kinase 2                                                                           | NM_183417       | 1.561156231 | 0.030829885 |
| 10347779 | 9830004L10Rik: RIKEN cDNA 9830004L10 gene                                                                 | AK137457        | 1.515406736 | 0.030840639 |
| 10543471 | Pot1a: protection of telomeres 1A                                                                         | NM_133931       | 1.843931538 | 0.030965543 |
| 10389507 | Tmem49: transmembrane protein 49                                                                          | NM_029478       | 2.068641888 | 0.031023892 |
| 10592023 | Aplp2: amyloid beta (A4) precursor-like protein 2                                                         | NM_001102455    | 1.531733574 | 0.031211614 |
| 10595768 | Pls1: plastin 1 (l-isoform)                                                                               | NM_001033210    | 1.836759566 | 0.031337639 |
| 10441511 | Tmem181a: transmembrane protein 181A                                                                      | NM_001033178    | 2.049572744 | 0.031362728 |
| 10462333 | Cdc37l1: cell division cycle 37 homolog ( <i>S. cerevisiae</i> )-like 1                                   | NM_025950       | 1.558809112 | 0.031374618 |
| 10537728 | Casp2: caspase 2                                                                                          | NM_007610       | 1.551889788 | 0.031400991 |
| 10515080 | 4930522H14Rik: RIKEN cDNA 4930522H14 gene                                                                 | BC125547        | 1.510102019 | 0.031428588 |
| 10605664 | Mageb1: melanoma antigen, family B, 1                                                                     | NM_010759       | 1.738304089 | 0.031483803 |
| 10601915 | Fam199x: family with sequence similarity 199, X-linked                                                    | NM_146261       | 1.617831766 | 0.031500815 |

|          |                                                                           |                 |             |             |
|----------|---------------------------------------------------------------------------|-----------------|-------------|-------------|
| 10604595 | Mir106a: microRNA 106a                                                    | NR_029657       | 1.752472008 | 0.031617544 |
| 10390816 | Krt27: keratin 27                                                         | NM_010666       | 1.717790399 | 0.031756562 |
| 10425109 | Elfn2: leucine rich repeat and fibronectin type III, extracellular 2      | NM_183141       | 1.605783147 | 0.031828682 |
| 10553071 | Ntn5: netrin 5                                                            | NM_001033356    | 1.78599055  | 0.031832974 |
| 10468309 | Sh3pxd2a: SH3 and PX domains 2A                                           | NM_008018       | 1.934873863 | 0.031885382 |
| 10525961 | Piwil1: piwi-like homolog 1 (Drosophila)                                  | NM_021311       | 1.830243059 | 0.03193753  |
| 10350823 | Abl2: v-abl Abelson murine leukemia viral oncogene homolog 2 (arg, A      | NM_001136104    | 1.516376054 | 0.03195413  |
| 10578361 | Asah1: N-acylsphingosine amidohydrolase 1                                 | NM_019734       | 1.535597942 | 0.031955003 |
| 10411156 | Scamp1: secretory carrier membrane protein 1                              | NM_029153       | 1.894718059 | 0.032006432 |
| 10607064 | Gucy2f: guanylate cyclase 2f                                              | NM_001007576    | 1.672760703 | 0.032067297 |
| 10588294 | Topbp1: topoisomerase (DNA) II binding protein 1                          | NM_176979       | 2.104110093 | 0.032080924 |
| 10445944 | St6gal2: beta galactoside alpha 2,6 sialyltransferase 2                   | NM_172829       | 1.994457015 | 0.032163214 |
| 10543428 | Iqub: IQ motif and ubiquitin domain containing                            | NM_172535       | 1.706236999 | 0.032166726 |
| 10443449 | Kctd20: potassium channel tetramerisation domain containing 20            | NM_025888       | 1.708856549 | 0.03222751  |
| 10567851 | Nfatc2ip: nuclear factor of activated T-cells, cytoplasmic, calcineurin-d | NM_010900       | 1.778438695 | 0.032252802 |
| 10462973 | Hells: helicase, lymphoid specific                                        | NM_008234       | 1.681582725 | 0.032265497 |
| 10347796 | Rhbdd1: rhomboid domain containing 1                                      | NM_029777       | 1.881708435 | 0.032362047 |
| 10601993 | D330045A20Rik: RIKEN cDNA D330045A20 gene                                 | NM_175326       | 1.587962557 | 0.032443821 |
| 10538932 | Amd1: S-adenosylmethionine decarboxylase 1                                | NM_009665       | 1.526724004 | 0.03250762  |
| 10596347 | Atp2c1: ATPase, Ca++-sequestering                                         | NM_175025       | 1.539630677 | 0.032515478 |
| 10606694 | Btk: Bruton agammaglobulinemia tyrosine kinase                            | NM_013482       | 1.544836481 | 0.032700421 |
| 10555785 | Olf598: olfactory receptor 598                                            | NM_001011793    | 1.803848669 | 0.032846396 |
| 10444719 | Bat3: HLA-B-associated transcript 3                                       | NM_057171       | 1.541568443 | 0.033038244 |
| 10549396 | Gm6288: predicted gene 6288                                               | ENSMUST00000100 | 1.651682507 | 0.03313646  |
| 10601424 | Gpr174: G protein-coupled receptor 174                                    | NM_001177781    | 1.667897948 | 0.033202395 |
| 10440329 | 9330155M09Rik: RIKEN cDNA 9330155M09 gene                                 | AK038707        | 1.51514203  | 0.033250025 |
| 10475932 | Fbln7: fibulin 7                                                          | NM_024237       | 1.621474779 | 0.033276653 |
| 10410892 | Rasa1: RAS p21 protein activator 1                                        | NM_145452       | 1.874184539 | 0.033293108 |
| 10488147 | Flrt3: fibronectin leucine rich transmembrane protein 3                   | NM_001172160    | 1.625661448 | 0.033337716 |
| 10414262 | Ear2: eosinophil-associated, ribonuclease A family, member 2              | NM_007895       | 1.603228789 | 0.033396507 |
| 10447510 | Amd1: S-adenosylmethionine decarboxylase 1                                | NM_009665       | 1.527011743 | 0.033407133 |
| 10412466 | Hmgcs1: 3-hydroxy-3-methylglutaryl-Coenzyme A synthase 1                  | NM_145942       | 1.688899665 | 0.033436159 |
| 10366983 | Tmem194: transmembrane protein 194                                        | NM_001113211    | 2.05956047  | 0.033482658 |
| 10400006 | Ahr: aryl-hydrocarbon receptor                                            | NM_013464       | 1.520539438 | 0.033516719 |
| 10367033 | Zbtb39: zinc finger and BTB domain containing 39                          | NM_198035       | 2.207356586 | 0.03360218  |
| 10581336 | Gfod2: glucose-fructose oxidoreductase domain containing 2                | NM_027469       | 1.634445283 | 0.033715376 |
| 10576772 | Clec4g: C-type lectin domain family 4, member g                           | AK016282        | 1.568367177 | 0.033749277 |
| 10462480 | Cstf2t: cleavage stimulation factor, 3' pre-RNA subunit 2, tau            | NM_031249       | 1.581302414 | 0.033773827 |
| 10497904 | Nudt6: nudix (nucleoside diphosphate linked moiety X)-type motif 6        | NM_153561       | 1.788170369 | 0.033799946 |
| 10535508 | AU022870: expressed sequence AU022870                                     | BC048077        | 1.540503818 | 0.033965634 |
| 10395287 | Atxn7l1: ataxin 7-like 1                                                  | NM_028139       | 1.540503818 | 0.033965634 |
| 10565996 | Inpp1: inositol polyphosphate phosphatase-like 1                          | NM_010567       | 1.706121203 | 0.033973326 |
| 10568221 | Sephs2: selenophosphate synthetase 2                                      | NM_009266       | 1.914000719 | 0.034022773 |
| 10478447 | Stk4: serine/threonine kinase 4                                           | NM_021420       | 2.000187207 | 0.034086345 |
| 10517373 | Rcan3: regulator of calcineurin 3                                         | NM_022980       | 1.87784674  | 0.034220636 |
| 10439744 | Cd96: CD96 antigen                                                        | NM_032465       | 1.557480237 | 0.034488298 |
| 10574436 | Khdrbs1: KH domain containing, RNA binding, signal transduction asso      | NM_011317       | 1.71262431  | 0.034572021 |
| 10406287 | Ttc37: tetratricopeptide repeat domain 37                                 | NM_001081352    | 2.137598959 | 0.034622259 |
| 10419038 | Ghitm: growth hormone inducible transmembrane protein                     | NM_078478       | 1.637363535 | 0.034719508 |
| 10578880 | Tll1: tolloid-like                                                        | NM_009390       | 2.032892217 | 0.034778236 |
| 10479979 | Slc25a36: solute carrier family 25, member 36                             | NM_138756       | 1.945765026 | 0.03488221  |
| 10443459 | Sfrs3: splicing factor, arginine/serine-rich 3 (SRp20)                    | NM_013663       | 1.931431327 | 0.034900099 |
| 10369176 | D630037F22Rik: RIKEN cDNA D630037F22 gene                                 | NM_001033385    | 1.588192998 | 0.034915856 |
| 10483667 | Cir1: corepressor interacting with RBPJ, 1                                | NM_025854       | 1.567453391 | 0.034984086 |
| 10369704 | Hnrnp3: heterogeneous nuclear ribonucleoprotein H3                        | NM_001079824    | 1.694967737 | 0.035024592 |
| 10568464 | Ate1: arginyltransferase 1                                                | NM_013799       | 1.53696882  | 0.035081084 |
| 10394971 | Klf11: Kruppel-like factor 11                                             | NM_178357       | 1.713801245 | 0.035153135 |
| 10557853 | B230325K18Rik: RIKEN cDNA B230325K18 gene                                 | ENSMUST00000079 | 1.541122472 | 0.035207073 |
| 10499981 | Oaz3: ornithine decarboxylase antizyme 3                                  | NM_016901       | 1.788857569 | 0.035242649 |
| 10385004 | Nprl3: nitrogen permease regulator-like 3 (S. cerevisiae)                 | NM_181569       | 1.782029903 | 0.035283893 |
| 10409943 | Ctsm: cathepsin M                                                         | NM_022326       | 1.582674779 | 0.035405946 |
| 10428222 | Ncald: neurocalcin delta                                                  | NM_134094       | 1.775781718 | 0.035493004 |
| 10364293 | Ube2g2: ubiquitin-conjugating enzyme E2G 2                                | NM_019803       | 2.149472821 | 0.035503287 |
| 10585982 | Myo9a: myosin IXa                                                         | NM_173018       | 1.774623315 | 0.035526339 |
| 10530960 | Tmprss11d: transmembrane protease, serine 11d                             | NM_145561       | 2.085521719 | 0.035550709 |

|          |                                                                          |                  |             |             |
|----------|--------------------------------------------------------------------------|------------------|-------------|-------------|
| 10570429 | Zfp828: zinc finger protein 828                                          | NM_181854        | 2.244805781 | 0.035790917 |
| 10498415 | Dhx36: DEAH (Asp-Glu-Ala-His) box polypeptide 36                         | NM_028136        | 1.594973704 | 0.035801084 |
| 10491038 | Tbl1xr1: transducin (beta)-like 1X-linked receptor 1                     | NM_030732        | 2.015380104 | 0.035815776 |
| 10545583 | Pole4: polymerase (DNA-directed), epsilon 4 (p12 subunit)                | NM_025882        | 1.840966461 | 0.035869083 |
| 10576934 | Fam155a: family with sequence similarity 155, member A                   | NM_173446        | 1.616515168 | 0.036065908 |
| 10397054 | Dcaf4: DDB1 and CUL4 associated factor 4                                 | NM_001165256     | 1.589054319 | 0.036122792 |
| 10394922 | Gm6950: predicted pseudogene 6950                                        | ENSMUST000000080 | 1.654592352 | 0.036126413 |
| 10394331 | Pfn4: profilin family, member 4                                          | NM_028376        | 1.819379739 | 0.036223977 |
| 10473760 | Celf1: CUGBP, Elav-like family member 1                                  | NM_017368        | 1.562859882 | 0.036265596 |
| 10440417 | 9430053O09Rik: RIKEN cDNA 9430053O09 gene                                | AK140789         | 1.515324018 | 0.036387996 |
| 10404038 | Hist1h3d: histone cluster 1, H3d                                         | NM_178204        | 1.684309823 | 0.03649379  |
| 10502191 | Ostc: oligosaccharyltransferase complex subunit                          | NM_025509        | 1.808945639 | 0.036641709 |
| 10369867 | Tfam: transcription factor A, mitochondrial                              | NM_009360        | 2.022066349 | 0.036646431 |
| 10428310 | Azin1: antizyme inhibitor 1                                              | NM_001102458     | 1.540516844 | 0.036680153 |
| 10556769 | Acsm3: acyl-CoA synthetase medium-chain family member 3                  | NM_016870        | 1.51768849  | 0.036857965 |
| 10459837 | 8030462N17Rik: RIKEN cDNA 8030462N17 gene                                | BC120889         | 1.514469379 | 0.036883056 |
| 10374466 | Rab1: RAB1, member RAS oncogene family                                   | NM_008996        | 1.85776942  | 0.036899484 |
| 10508907 | Lin28a: lin-28 homolog A (C. elegans)                                    | NM_145833        | 1.722333228 | 0.036954582 |
| 10502451 | Bmpr1b: bone morphogenetic protein receptor, type 1B                     | NM_007560        | 1.542746604 | 0.037053892 |
| 10407993 | Sfrs13a: splicing factor, arginine/serine-rich 13A                       | NM_001080387     | 1.929041639 | 0.037064725 |
| 10590325 | Ctnnb1: catenin (cadherin associated protein), beta 1                    | NM_007614        | 1.581782983 | 0.037272353 |
| 10605662 | Gm5072: predicted gene 5072                                              | NM_001114678     | 1.649652644 | 0.037530175 |
| 10424379 | Sfrs3: splicing factor, arginine/serine-rich 3 (SRp20)                   | NM_013663        | 1.931500689 | 0.037649454 |
| 10594322 | Pias1: protein inhibitor of activated STAT 1                             | NM_019663        | 1.821328078 | 0.037664253 |
| 10429547 | Cyp11b2: cytochrome P450, family 11, subfamily b, polypeptide 2          | NM_009991        | 1.586542758 | 0.037666802 |
| 10347106 | Rpe: ribulose-5-phosphate-3-epimerase                                    | NM_025683        | 1.888436821 | 0.037764829 |
| 10462881 | Gpr120: G protein-coupled receptor 120                                   | NM_181748        | 1.666361574 | 0.037848971 |
| 10466274 | Olfr1419: olfactory receptor 1419                                        | BC147200         | 1.798396465 | 0.037893334 |
| 10517486 | Gm12986: heterogeneous nuclear ribonucleoprotein A3 pseudogene           | XR_031848        | 1.64255729  | 0.038067802 |
| 10498302 | Gm410: predicted gene 410                                                | NM_001033349     | 1.647035782 | 0.038098782 |
| 10458046 | D0H4S114: DNA segment, human D4S114                                      | NM_053078        | 1.586608494 | 0.038106615 |
| 10562416 | Cebpg: CCAAT/enhancer binding protein (C/EBP), gamma                     | NM_009884        | 1.562658556 | 0.038108399 |
| 10347460 | Ttll4: tubulin tyrosine ligase-like family, member 4                     | NM_001014974     | 2.14137648  | 0.038258189 |
| 10561474 | Il28a: interleukin 28A                                                   | NM_001024673     | 1.703541383 | 0.038270286 |
| 10391990 | 1700081L11Rik: RIKEN cDNA 1700081L11 gene                                | BC054752         | 1.503393313 | 0.038312624 |
| 10474524 | Olfr1318: olfactory receptor 1318                                        | NM_001011802     | 1.797177361 | 0.038369585 |
| 10350896 | Astn1: astrotactin 1                                                     | NM_007495        | 1.53608365  | 0.038385017 |
| 10607156 | Dcx: doublecortin                                                        | NM_001110222     | 1.589320537 | 0.038394192 |
| 10379989 | Fam33a: family with sequence similarity 33, member A                     | NM_025377        | 1.618041638 | 0.038443504 |
| 10407022 | Gm4938: H3 histone, family 3 pseudogene                                  | XM_138832        | 1.647469833 | 0.038465159 |
| 10548940 | Lmo3: LIM domain only 3                                                  | NM_207222        | 1.72460666  | 0.038490732 |
| 10368817 | Ccdc162: coiled-coil domain containing 162                               | NM_001177571     | 1.553427437 | 0.038668474 |
| 10404521 | Bphl: biphenyl hydrolase-like (serine hydrolase, breast epithelial mucin | NM_026512        | 1.543185095 | 0.038688864 |
| 10515113 | Hnrnpa3: heterogeneous nuclear ribonucleoprotein A3                      | BC062198         | 1.694280534 | 0.038716546 |
| 10518372 | Miip: migration and invasion inhibitory protein                          | NM_001025365     | 1.751005951 | 0.0387523   |
| 10492220 | 2810407C02Rik: RIKEN cDNA 2810407C02 gene                                | NM_001040396     | 1.508682896 | 0.038807366 |
| 10512935 | Amd1: S-adenosylmethionine decarboxylase 1                               | NM_009665        | 1.528803658 | 0.038975085 |
| 10526520 | Plod3: procollagen-lysine, 2-oxoglutarate 5-dioxygenase 3                | NM_011962        | 1.836695593 | 0.039104321 |
| 10401630 | Acyp1: acylphosphatase 1, erythrocyte (common) type                      | NM_025421        | 1.518211947 | 0.039162933 |
| 10392560 | Abca9: ATP-binding cassette, sub-family A (ABC1), member 9               | NM_147220        | 1.515743269 | 0.039180754 |
| 10433492 | Atf7ip2: activating transcription factor 7 interacting protein 2         | NM_153123        | 1.53815801  | 0.039256997 |
| 10577340 | Defb37: defensin beta 37                                                 | NM_181683        | 1.593273067 | 0.039308301 |
| 10371589 | Gm10763: predicted gene 10763                                            | ENSMUST000000099 | 1.641890589 | 0.039363147 |
| 10367717 | BC013529: cDNA sequence BC013529                                         | NM_145418        | 1.541762276 | 0.039387761 |
| 10410604 | Ahrr: aryl-hydrocarbon receptor repressor                                | NM_009644        | 1.521134431 | 0.039432432 |
| 10574560 | 2310038E17Rik: RIKEN cDNA 2310038E17 gene                                | BC117742         | 1.506050091 | 0.039475784 |
| 10421774 | Dgkh: diacylglycerol kinase, eta                                         | NM_001081336     | 1.593329998 | 0.039650735 |
| 10478875 | Rnf114: ring finger protein 114                                          | NM_030743        | 1.882735716 | 0.039667244 |
| 10417415 | Gm1973: predicted gene 1973                                              | NM_029288        | 1.645276164 | 0.039672898 |
| 10480605 | Cobra1: cofactor of BRCA1                                                | NM_021393        | 1.570536294 | 0.03980066  |
| 10416421 | Lrch1: leucine-rich repeats and calponin homology (CH) domain contai     | NM_001033439     | 1.729667175 | 0.039840002 |
| 10466317 | Zfp91-Cntf: Zfp91-Cntf readthrough transcript                            | NR_024093        | 2.24668913  | 0.039965021 |
| 10510574 | Errfi1: ERBB receptor feedback inhibitor 1                               | NM_133753        | 1.609755423 | 0.039967353 |
| 10399908 | Prkar2b: protein kinase, cAMP dependent regulatory, type II beta         | NM_011158        | 1.850724638 | 0.040069994 |
| 10358607 | Hmcn1: hemicentin 1                                                      | NM_001024720     | 1.688320104 | 0.040154345 |

|          |                                                                        |              |             |             |
|----------|------------------------------------------------------------------------|--------------|-------------|-------------|
| 10398455 | Ppp2r5c: protein phosphatase 2, regulatory subunit B (B56), gamma is   | NM_001135001 | 1.849016549 | 0.040198154 |
| 10550047 | Zscan22: zinc finger and SCAN domain containing 22                     | NM_001001447 | 2.253535432 | 0.04027063  |
| 10521796 | Mir218-1: microRNA 218-1                                               | NR_029798    | 1.759662761 | 0.040337981 |
| 10582862 | Arhgef12: Rho guanine nucleotide exchange factor (GEF) 12              | NM_027144    | 1.53258019  | 0.040369878 |
| 10369911 | 1110038D17Rik: RIKEN cDNA 1110038D17 gene                              | BC118613     | 1.50247861  | 0.04038709  |
| 10546567 | A130022J15Rik: RIKEN cDNA A130022J15 gene                              | BC048939     | 1.515530113 | 0.040434176 |
| 10479627 | Tpd52l2: tumor protein D52-like 2                                      | NM_025482    | 2.109752744 | 0.040459088 |
| 10424370 | Trib1: tribbles homolog 1 (Drosophila)                                 | NM_144549    | 2.109774268 | 0.040460854 |
| 10592154 | Hyls1: hydrolethalus syndrome 1                                        | NM_029762    | 1.696861711 | 0.040513277 |
| 10372417 | 4921506J03Rik: RIKEN cDNA 4921506J03 gene                              | NM_001033474 | 1.509189411 | 0.040553914 |
| 10600341 | Emd: emerlin                                                           | NM_007927    | 1.607193099 | 0.040581312 |
| 10544596 | Tmem176b: transmembrane protein 176B                                   | NM_023056    | 2.044987442 | 0.040649511 |
| 10472350 | Gca: grancalcin                                                        | NM_145523    | 1.631053989 | 0.040653399 |
| 10361712 | Shprh: SNF2 histone linker PHD RING helicase                           | NM_172937    | 1.934953144 | 0.040708055 |
| 10409240 | Sema4d: sema domain, immunoglobulin domain (Ig), transmembrane         | NM_013660    | 1.90513834  | 0.04082031  |
| 10384656 | B3gnt2: UDP-GlcNAc:betaGal beta-1,3-N-acetylglucosaminyltransferas     | NM_016888    | 1.541139955 | 0.040832804 |
| 10449839 | Akap8: A kinase (PRKA) anchor protein 8                                | NM_019774    | 1.524546425 | 0.040947083 |
| 10494857 | Nras: neuroblastoma ras oncogene                                       | NM_010937    | 1.782397627 | 0.041005543 |
| 10607933 | Hccs: holocytochrome c synthetase                                      | NM_008222    | 1.678638726 | 0.041079885 |
| 10395198 | Gm9359: tripartite motif-containing 13 pseudogene                      | XR_032641    | 1.660323089 | 0.041118808 |
| 10484307 | Frzb: frizzled-related protein                                         | NM_011356    | 1.626660979 | 0.041188466 |
| 10357562 | Il20: interleukin 20                                                   | NM_021380    | 1.703284966 | 0.04122377  |
| 10494574 | Prkab2: protein kinase, AMP-activated, beta 2 non-catalytic subunit    | NM_182997    | 1.850166756 | 0.041247755 |
| 10422067 | Fbxl3: F-box and leucine-rich repeat protein 3                         | NM_015822    | 1.622384956 | 0.041302159 |
| 10411751 | Slc30a5: solute carrier family 30 (zinc transporter), member 5         | NM_022885    | 1.949121042 | 0.041330778 |
| 10375634 | Mapk9: mitogen-activated protein kinase 9                              | NM_001163672 | 1.743845878 | 0.041401839 |
| 10345411 | Arhgef4: Rho guanine nucleotide exchange factor (GEF) 4                | NM_183019    | 1.534456578 | 0.041446901 |
| 10573027 | Otud4: OTU domain containing 4                                         | NM_001081164 | 1.810716424 | 0.041477597 |
| 10374773 | Mir216a: microRNA 216a                                                 | NR_029797    | 1.759188847 | 0.041490976 |
| 10557470 | Gdpd3: glycerophosphodiester phosphodiesterase domain containing       | NM_024228    | 1.634058564 | 0.041681043 |
| 10400089 | Gm889: predicted gene 889                                              | BC147387     | 1.659344728 | 0.041772019 |
| 10573160 | 4933434I20Rik: RIKEN cDNA 4933434I20 gene                              | NM_026233    | 1.512994295 | 0.041788605 |
| 10536527 | Capza2: capping protein (actin filament) muscle Z-line, alpha 2        | NM_007604    | 1.550691244 | 0.041826926 |
| 10532308 | 4930522L14Rik: RIKEN cDNA 4930522L14 gene                              | XM_001476915 | 1.510555675 | 0.041998554 |
| 10492045 | Hnrnpa3: heterogeneous nuclear ribonucleoprotein A3                    | NM_053263    | 1.693700639 | 0.042024986 |
| 10345077 | Khdc1a: KH domain containing 1A                                        | NM_183322    | 1.71067685  | 0.042133094 |
| 10400350 | Cfl2: cofilin 2, muscle                                                | NM_007688    | 1.563275706 | 0.042342971 |
| 10368681 | Rfpl4b: ret finger protein-like 4B                                     | NM_001177783 | 1.878913289 | 0.042552571 |
| 10361995 | Fam54a: family with sequence similarity 54, member A                   | NM_027930    | 1.619745777 | 0.042591512 |
| 10501676 | Hiat1: hippocampus abundant gene transcript 1                          | NM_008246    | 1.683905016 | 0.042605206 |
| 10345079 | Khdc1a: KH domain containing 1A                                        | NM_183322    | 1.71053905  | 0.042606029 |
| 10411287 | Btf3l4: basic transcription factor 3-like 4                            | NM_027453    | 1.543992787 | 0.042912961 |
| 10501489 | Hectd1: HECT domain containing 1                                       | NM_144788    | 1.681276805 | 0.043085507 |
| 10417281 | Gm1973: predicted gene 1973                                            | NM_029288    | 1.644660217 | 0.043307579 |
| 10582978 | 8430410K20Rik: RIKEN cDNA 8430410K20 gene                              | BC014729     | 1.514701157 | 0.043328892 |
| 10404848 | Jarid2: jumonji, AT rich interactive domain 2                          | NM_021878    | 1.706544287 | 0.04332935  |
| 10447517 | Pisd-ps2: phosphatidylserine decarboxylase, pseudogene 2               | NR_003519    | 1.829465372 | 0.043581339 |
| 10576532 | Tsnax: translin-associated factor X                                    | NM_016909    | 2.128099602 | 0.043658296 |
| 10379998 | Trim37: tripartite motif-containing 37                                 | NM_197987    | 2.116111945 | 0.043831736 |
| 10573893 | Fto: fat mass and obesity associated                                   | NM_011936    | 1.630703875 | 0.043943685 |
| 10520544 | Mapre3: microtubule-associated protein, RP/EB family, member 3         | NM_133350    | 1.744706831 | 0.043998523 |
| 10410947 | Xrcc4: X-ray repair complementing defective repair in Chinese hamste   | NM_028012    | 2.194889946 | 0.044091237 |
| 10551011 | Dmrtc2: doublesex and mab-3 related transcription factor like family C | NM_027732    | 1.595137615 | 0.044197581 |
| 10430536 | Ddx17: DEAD (Asp-Glu-Ala-Asp) box polypeptide 17                       | NM_199080    | 1.58984101  | 0.044419502 |
| 10564791 | Kif7: kinesin family member 7                                          | NM_010626    | 1.712894072 | 0.044421451 |
| 10367600 | Esr1: estrogen receptor 1 (alpha)                                      | NM_007956    | 1.610145003 | 0.044455293 |
| 10431722 | Gxytl1: glucoside xylosyltransferase 1                                 | NM_001033275 | 1.673685916 | 0.044463602 |
| 10420470 | Gm9022: glyceraldehyde-3-phosphate dehydrogenase pseudogene            | XR_004746    | 1.659757983 | 0.0445021   |
| 10379363 | Atad5: ATPase family, AAA domain containing 5                          | NM_001029856 | 1.536378471 | 0.04450846  |
| 10420390 | Xpo4: exportin 4                                                       | NM_020506    | 2.194690595 | 0.044523408 |
| 10472047 | Tas2r134: taste receptor, type 2, member 134                           | NM_199158    | 2.013531388 | 0.044597663 |
| 10525374 | Pptc7: PTC7 protein phosphatase homolog (S. cerevisiae)                | NM_177242    | 1.849680576 | 0.044651395 |
| 10458999 | Fbn2: fibrillin 2                                                      | NM_010181    | 1.621950262 | 0.044919429 |
| 10594447 | Map2k1: mitogen-activated protein kinase kinase 1                      | NM_008927    | 1.741128811 | 0.044962971 |
| 10415279 | Fitm1: fat storage-inducing transmembrane protein 1                    | NM_026808    | 1.625074272 | 0.045021262 |

|          |                                                                      |                 |             |             |
|----------|----------------------------------------------------------------------|-----------------|-------------|-------------|
| 10373873 | Sf3a1: splicing factor 3a, subunit 1                                 | NM_026175       | 1.923376578 | 0.045098188 |
| 10367830 | Grm1: glutamate receptor, metabotropic 1                             | NM_001114333    | 1.672459893 | 0.045175538 |
| 10476691 | Polr3f: polymerase (RNA) III (DNA directed) polypeptide F            | NM_029763       | 1.843475182 | 0.045355657 |
| 10577973 | Adrb3: adrenergic receptor, beta 3                                   | NM_013462       | 1.519845995 | 0.045412592 |
| 10390574 | Fbxl20: F-box and leucine-rich repeat protein 20                     | NM_028149       | 1.622072956 | 0.04560764  |
| 10491060 | Spin3: spindlin family, member 3                                     | XR_031023       | 1.982563544 | 0.0456614   |
| 10594183 | Senp8: SUMO/sentrin specific peptidase 8                             | NM_001172068    | 1.911256534 | 0.045721246 |
| 10471424 | Fam102a: family with sequence similarity 102, member A               | NM_153560       | 1.613905443 | 0.045793898 |
| 10558614 | Cd163l1: CD163 molecule-like 1                                       | NM_172909       | 1.556466232 | 0.045969219 |
| 10488441 | Zfp120: zinc finger protein 120                                      | NM_181266       | 2.212694215 | 0.046004654 |
| 10520483 | Ept1: ethanolaminephosphotransferase 1 (CDP-ethanolamine-specific)   | NM_027652       | 1.608054463 | 0.046010366 |
| 10357164 | Epb4.1l5: erythrocyte protein band 4.1-like 5                        | NM_145506       | 1.608054463 | 0.046010366 |
| 10607395 | Mageh1: melanoma antigen, family H, 1                                | NM_023788       | 1.739771863 | 0.046014907 |
| 10470283 | Egfl7: EGF-like domain 7                                             | NM_198724       | 1.604708068 | 0.046062152 |
| 10516046 | Gm12877: predicted gene 12877                                        | XM_987282       | 1.642229019 | 0.046125855 |
| 10562599 | Gm16387: predicted gene 16387                                        | ENSMUST00000098 | 1.643589192 | 0.046318938 |
| 10573998 | Ogfod1: 2-oxoglutarate and iron-dependent oxygenase domain containi  | NM_177767       | 1.789197176 | 0.046363664 |
| 10568536 | Cpxm2: carboxypeptidase X 2 (M14 family)                             | NM_018867       | 1.575167153 | 0.046477616 |
| 10454310 | Galnt1: UDP-N-acetyl-alpha-D-galactosamine:polypeptide N-acetylgluc  | NM_013814       | 1.630993813 | 0.046496116 |
| 10472923 | Ak3l1: adenylate kinase 3-like 1                                     | NM_001177602    | 1.523265782 | 0.046559851 |
| 10574976 | Pla2g15: phospholipase A2, group XV                                  | NM_133792       | 1.832353334 | 0.046620106 |
| 10530892 | Cenpc1: centromere protein C1                                        | NM_007683       | 1.563031516 | 0.046635193 |
| 10466314 | Gm6545: predicted gene 6545                                          | XM_889589       | 1.654064138 | 0.046640878 |
| 10533285 | Ptpn11: protein tyrosine phosphatase, non-receptor type 11           | NM_011202       | 1.8567211   | 0.046644985 |
| 10506269 | Ak3l1: adenylate kinase 3-like 1                                     | NM_001177602    | 1.523029696 | 0.046649142 |
| 10479087 | Stx16: syntaxin 16                                                   | NM_172675       | 2.001889282 | 0.046660662 |
| 10420488 | D14Ertd668e: DNA segment, Chr 14, ERATO Doi 668, expressed           | NM_001164323    | 1.586943502 | 0.046698345 |
| 10499187 | Ube2l3: ubiquitin-conjugating enzyme E2L 3                           | NM_009456       | 2.149932743 | 0.046731031 |
| 10529873 | Rab2a: RAB2A, member RAS oncogene family                             | NM_021518       | 1.867241926 | 0.046799542 |
| 10540540 | O610010K06Rik: RIKEN cDNA O610010K06 gene                            | NM_027861       | 1.501462454 | 0.046801397 |
| 10568361 | Yipf5: Yip1 domain family, member 5                                  | NM_023311       | 2.198431628 | 0.046813082 |
| 10418053 | Kcnma1: potassium large conductance calcium-activated channel, sub   | NM_010610       | 1.708248921 | 0.046878091 |
| 10468980 | Fam107b: family with sequence similarity 107, member B               | BC021353        | 1.613921583 | 0.046879141 |
| 10364413 | Olf1355: olfactory receptor 1355                                     | NM_207571       | 1.797384643 | 0.046879759 |
| 10354003 | Mgat4a: mannoside acetylglucosaminyltransferase 4, isoenzyme A       | NM_173870       | 1.748334848 | 0.046948425 |
| 10530641 | Usp46: ubiquitin specific peptidase 46                               | NM_177561       | 2.167421869 | 0.047278288 |
| 10427814 | Golp3: golgi phosphoprotein 3                                        | NM_025673       | 1.664915526 | 0.047278866 |
| 10470200 | Lcn11: lipocalin 11                                                  | NM_001100455    | 1.719286955 | 0.047368439 |
| 10605674 | Pola1: polymerase (DNA directed), alpha 1                            | NM_008892       | 1.840040471 | 0.047371297 |
| 10522075 | Klhl5: kelch-like 5 (Drosophila)                                     | NM_175174       | 1.715860528 | 0.047532492 |
| 10567626 | Gga2: golgi associated, gamma adaptin ear containing, ARF binding pr | NM_028758       | 1.636506736 | 0.047551256 |
| 10473008 | Hnrnpa3: heterogeneous nuclear ribonucleoprotein A3                  | NM_146130       | 1.693171997 | 0.047579078 |
| 10565156 | Homer2: homer homolog 2 (Drosophila)                                 | NM_011983       | 1.695566379 | 0.047596748 |
| 10348817 | Sept2: septin 2                                                      | NM_001159719    | 1.915477149 | 0.047629923 |
| 10597427 | Trim71: tripartite motif-containing 71                               | NM_001042503    | 2.121157028 | 0.047649016 |
| 10522530 | Kit: kit oncogene                                                    | NM_001122733    | 1.713163579 | 0.047689665 |
| 10425046 | Apol7e: apolipoprotein L 7e                                          | XR_004836       | 1.531742458 | 0.047699242 |
| 10456329 | S330437I02Rik: RIKEN cDNA S330437I02 gene                            | NM_177028       | 1.513251128 | 0.047769469 |
| 10499138 | Dcl2: doublecortin-like kinase 2                                     | NM_027539       | 1.58911063  | 0.04777149  |
| 10515090 | Cdkn2c: cyclin-dependent kinase inhibitor 2C (p18, inhibits CDK4)    | NM_007671       | 1.561943789 | 0.047796518 |
| 10496359 | Emcn: endomucin                                                      | NM_001163522    | 1.606660275 | 0.047919873 |
| 10463121 | Zfp518: zinc finger protein 518                                      | NM_028319       | 2.237606361 | 0.047946661 |
| 10352735 | Ints7: integrator complex subunit 7                                  | NM_178632       | 1.706211106 | 0.047978402 |
| 10563745 | Mrgprb5: MAS-related GPR, member B5                                  | NM_207538       | 1.768995602 | 0.048045006 |
| 10565089 | Cpeb1: cytoplasmic polyadenylation element binding protein 1         | NM_007755       | 1.574531164 | 0.048175388 |
| 10570556 | Mcp1: microcephaly, primary autosomal recessive 1                    | NM_173189       | 1.747120165 | 0.048304912 |
| 10518902 | Hes3: hairy and enhancer of split 3 (Drosophila)                     | NM_008237       | 1.681741282 | 0.048399068 |
| 10579976 | Elmod2: ELMO domain containing 2                                     | NM_178736       | 1.606015811 | 0.04841545  |
| 10345869 | Tmem182: transmembrane protein 182                                   | NM_001081198    | 2.05563461  | 0.048433702 |
| 10374485 | Peli1: pellino 1                                                     | NM_023324       | 1.816885473 | 0.048608672 |
| 10484758 | Olf1198: olfactory receptor 1198                                     | NM_207567       | 1.792009868 | 0.048677064 |
| 10458663 | Dpysl3: dihydropyrimidinase-like 3                                   | NM_009468       | 1.598641622 | 0.048824705 |
| 10394593 | Fam49a: family with sequence similarity 49, member A                 | NM_029758       | 1.619137099 | 0.048951437 |
| 10349016 | Z310035C23Rik: RIKEN cDNA Z310035C23 gene                            | NM_173187       | 1.504770525 | 0.048970844 |
| 10577226 | Z610019F03Rik: RIKEN cDNA Z610019F03 gene                            | NM_173744       | 1.507346197 | 0.048980231 |

|          |                                                           |                 |             |             |
|----------|-----------------------------------------------------------|-----------------|-------------|-------------|
| 10448062 | Gm7177: predicted gene 7177                               | XR_032603       | 1.655076346 | 0.049144581 |
| 10548653 | Prpmp5: proline-rich protein MP5                          | NM_001024705    | 1.855358457 | 0.049246104 |
| 10479063 | Rab22a: RAB22A, member RAS oncogene family                | NM_024436       | 1.859689517 | 0.049280314 |
| 10568521 | 2310057M21Rik: RIKEN cDNA 2310057M21 gene                 | BC044749        | 1.50624128  | 0.049308335 |
| 10579736 | 9130011J15Rik: RIKEN cDNA 9130011J15 gene                 | BC055692        | 1.514820499 | 0.049555213 |
| 10518847 | Phf13: PHD finger protein 13                              | NM_172705       | 1.820049273 | 0.049572097 |
| 10437160 | Ets2: E26 avian leukemia oncogene 2, 3' domain            | NM_011809       | 1.612752286 | 0.04965514  |
| 10477924 | Tgif2: TGFB-induced factor homeobox 2                     | NM_173396       | 2.030303224 | 0.049676108 |
| 10407809 | Gpr137b: G protein-coupled receptor 137B                  | ENSMUST00000021 | 1.66730116  | 0.049708255 |
| 10344741 | Hnrnpa3: heterogeneous nuclear ribonucleoprotein A3       | NM_053263       | 1.694063539 | 0.049752522 |
| 10429524 | D730001G18Rik: RIKEN cDNA D730001G18 gene                 | NR_027836       | 1.588511954 | 0.049768991 |
| 10565935 | Arhgef17: Rho guanine nucleotide exchange factor (GEF) 17 | NM_001081116    | 1.532856026 | 0.049963464 |
